# Supplementary material for: Core competencies in neurocritical care training in China: consensus developed by a national Delphi consensus survey combined with nominal group technique
Source: PubMed Central journal article supplement — BMJ Open. 2020 Jan 6;10(1):e033441. doi: 10.1136/bmjopen-2019-033441 (PMC6955523; doi:10.1136/bmjopen-2019-033441), 2020-01-06
Supplement: bmjopen-2019-033441.draft_revisions.pdf [file bmjopen-2019-033441.draft_revisions.pdf]

# BMJ Open

BMJ Open is committed to open peer review. As part of this commitment we make the peer review history of every article we publish publicly available.

When an article is published we post the peer reviewers' comments and the authors' responses online. We also post the versions of the paper that were used during peer review. These are the versions that the peer review comments apply to.

The versions of the paper that follow are the versions that were submitted during the peer review process. They are not the versions of record or the final published versions. They should not be cited or distributed as the published version of this manuscript.

BMJ Open is an open access journal and the full, final, typeset and author-corrected version of record of the manuscript is available on our site with no access controls, subscription charges or pay-per-view fees (<http://bmjopen.bmj.com>).

If you have any questions on BMJ Open's open peer review process please email [editorial.bmjopen@bmj.com](mailto:editorial.bmjopen@bmj.com)

# BMJ Open

## Core competencies in neurocritical care training in China: consensus developed by a national Delphi consensus survey combined with nominal group technique

|                               |                                                                                                                                                                                                                                                                                                                                                                                                                                                                                                                                                                                                                                                                                                                                                                                                                                                                                                                                                                                                                                                                                                                                                     |
|-------------------------------|-----------------------------------------------------------------------------------------------------------------------------------------------------------------------------------------------------------------------------------------------------------------------------------------------------------------------------------------------------------------------------------------------------------------------------------------------------------------------------------------------------------------------------------------------------------------------------------------------------------------------------------------------------------------------------------------------------------------------------------------------------------------------------------------------------------------------------------------------------------------------------------------------------------------------------------------------------------------------------------------------------------------------------------------------------------------------------------------------------------------------------------------------------|
| Journal:                      | <i>BMJ Open</i>                                                                                                                                                                                                                                                                                                                                                                                                                                                                                                                                                                                                                                                                                                                                                                                                                                                                                                                                                                                                                                                                                                                                     |
| Manuscript ID                 | bmjopen-2019-033441                                                                                                                                                                                                                                                                                                                                                                                                                                                                                                                                                                                                                                                                                                                                                                                                                                                                                                                                                                                                                                                                                                                                 |
| Article Type:                 | Research                                                                                                                                                                                                                                                                                                                                                                                                                                                                                                                                                                                                                                                                                                                                                                                                                                                                                                                                                                                                                                                                                                                                            |
| Date Submitted by the Author: | 05-Aug-2019                                                                                                                                                                                                                                                                                                                                                                                                                                                                                                                                                                                                                                                                                                                                                                                                                                                                                                                                                                                                                                                                                                                                         |
| Complete List of Authors:     | Cui, Zhen; Ji Shui Tan Hospital and Fourth Medical College of Peking University, Department of Critical Care Medicine<br>Gao, Liang; Shanghai Tenth People's Hospital, Department of Neurosurgery<br>Huang, Qi Bing; Shandong University Qilu Hospital, Department of Neurosurgery<br>Li, Li Hong; Tangdu Hospital Fourth Military Medical University, Department of Neurosurgery<br>Qiu, Bing Hui; Southern Medical University Nanfang Hospital, Department of Neurosurgery<br>Shi, Guang Zhi; Beijing Tiantan Hospital, Department of Critical Care Medicine<br>Yu, Xiang You; Xinjiang Medical University Affiliated First Hospital, Department of Critical Care Medicine<br>Wang, Yan; Xinjiang Medical University Affiliated First Hospital, Department of Critical Care Medicine<br>Zhang, Li ; Xinjiang Medical University Affiliated First Hospital, Department of Critical Care Medicine<br>Wang, Yumei; Beijing Tiantan Hospital, Department of Critical Care Medicine<br>Zhang, Linlin; Beijing Tiantan Hospital, Department of Critical Care Medicine<br>Zhou, Jian-Xin; Beijing Tiantan Hospital, Department of Critical Care Medicine |
| Keywords:                     | neurocritical care, training, core competency, consensus, Delphi, nominal group                                                                                                                                                                                                                                                                                                                                                                                                                                                                                                                                                                                                                                                                                                                                                                                                                                                                                                                                                                                                                                                                     |
|                               |                                                                                                                                                                                                                                                                                                                                                                                                                                                                                                                                                                                                                                                                                                                                                                                                                                                                                                                                                                                                                                                                                                                                                     |

SCHOLARONE™  
Manuscripts

1  
2  
3 **Core competencies in neurocritical care training in China: consensus developed**  
4  
5 **by a national Delphi consensus survey combined with nominal group technique**  
6

7 Zhen Cui,<sup>1,2</sup> Liang Gao,<sup>3</sup> Qi-Bing Huang,<sup>4</sup> Li-Hong Li,<sup>5</sup> Bing-Hui Qiu,<sup>6</sup> Guang-Zhi Shi,<sup>1</sup> Xiang-You  
8 Yu,<sup>7</sup> Yan Wang,<sup>7</sup> Li Zhang,<sup>7</sup> Yu-Mei Wang,<sup>1</sup> Linlin Zhang,<sup>1,†</sup> Jian-Xin Zhou,<sup>1,\*</sup> On behalf of the  
9 Working Group from Neuro-Critical Care Committee affiliated to the Chinese Association of Critical  
10 Care Physicians and the National Center for Healthcare Quality Management in Neurological Diseases.  
11  
12

13  
14  
15 <sup>1</sup> Department of Critical Care Medicine, Beijing Tiantan Hospital, Capital Medical University, Beijing,  
16 China.  
17

18  
19 <sup>2</sup> Department of Critical Care Medicine, Beijing Jishuitan Hospital, Peking University, Beijing, China.  
20

21 <sup>3</sup> Department of Neurosurgery, Shanghai Tenth people's hospital, Tongji University, Shanghai, China.  
22

23 <sup>4</sup> Department of Neurosurgery, Qilu Hospital, Shandong University, Jinan, Shandong, China.  
24

25 <sup>5</sup> Department of Neurosurgery, Tangdu Hospital, The Fourth Military Medical University, Xi'an,  
26 Shanxi, China.  
27

28 <sup>6</sup> Department of Neurosurgery, Nanfang Hospital, Southern Medical University, Guangzhou,  
29 Guangdong, China.  
30

31 <sup>7</sup> Department of Critical Care Medicine, Xinjiang Medical University 1st Hospital, Urumuqi, Xinjiang,  
32 China.  
33

34  
35  
36 \* Correspondence to

37 Jian-Xin Zhou;

38 Department of Critical Care Medicine, Beijing Tiantan Hospital, Capital Medical University, Beijing,  
39 100070, China  
40

41 Telephone: +8610 59978019  
42

43 Fax: +8610 59978019  
44

45 Email: zhoujx.cn@gmail.com  
46

47  
48  
49 † Equal contribution

50  
51  
52 Keywords: neurocritical care, training, core competency, consensus, Delphi, nominal group

53  
54 Word count: 2960  
55  
56  
57  
58  
59  
60

## ABSTRACT

**Objectives:** To define the core competencies essential for specialist training in neurocritical care in China.

**Design:** Modified Delphi method and nominal group technique.

**Setting:** National.

**Participants:** A nominal group of 11 members organized by the Neuro-Critical Care Committee affiliated with the Chinese Association of Critical Care Physicians and the National Center for Healthcare Quality Management in Neurological Diseases.

**Results:** 1094 respondents from 33 provinces in China participated in the online survey. A formal list containing 329 statements was generated for the rating by a nominal group. After five rounds of nominal group meetings and one round of comments and iterative review, 198 core competencies (54 on neurological diseases, 64 on general medical diseases, 42 on monitoring of practical procedures, 20 on professionalism and system management, 5 on ethical and legal aspects, 3 on the principles of research and certification, and 10 on scoring systems) formed the final list.

**Conclusion:** By using consensus techniques, we have developed a list of core competencies for neurocritical care training, which may serve as a reference for future specialist training programs in China.

**Main strengths and limitations of this study**

1. To the best of our knowledge, this is the first time that core competencies for neurocritical care has been established in China.
2. Consensus techniques were employed in our study, which may serve as a reference for future specialist training programs in China.
3. All of the nominal group members came from tertiary academic hospitals so they might not have represented the views of lower-grade hospitals.

For peer review only

## INTRODUCTION

During the past three decades, neuro-intensive care units (NICUs) in China grew rapidly with the development of neuroscience and critical care medicine [1,2]. A recent survey demonstrated that most of the NICUs in China are operated under a “closed” model and that clinical practice is conducted by full-time dedicated neuro-intensivists [3]. Systemic professional training and the performance assessment of physicians involved in neurocritical care practice are among the cornerstones of the development of the NICU [4]. At present, professional training programs focusing on critical care medicine and neurosurgery have been put into practice in China [5]. However, there is no standardized national training program for neuro-intensivists.

The experience of critical care and neurocritical care training in other countries has already illustrated that identifying core competencies is important for establishing standardized training programs [6-8]. To date, no core competency lists are available for neurocritical care training in China. Recently, a list of competencies for general critical care training has been established [9]. However, since neurocritical care is a multidisciplinary subspecialty that contains the characteristics of neurology, neurosurgery and critical care medicine, it is inappropriate to directly apply critical care or neurological/neurosurgical lists for neurocritical care. The United Council for Neurologic Subspecialties (UCNS) and the American Academy of Neurology (AAN) have published their core competency lists for neurocritical care training, respectively [7,10]. Both were generated based on the opinions of experts. Additionally, due to the diversity of medical resources and educational systems in China, the establishment of NICUs is extremely imbalanced across different regions [3]. Therefore, consensus statements issued by other countries may not be applicable for NICUs in China.

The Neuro-Critical Care Committee affiliated with the Chinese Association of Critical Care Physicians (NCCC-CACCP) and the National Center for Healthcare Quality Management in Neurological Diseases called for a working group to generate a list of fundamental core competencies for neurocritical care training in China. The modified Delphi method and nominal group (NG) technique were used during consensus establishment. The methodology and results of the present study might provide a reference for future specialist training programs in different regions.

## METHODS

The present study was conducted in three phases from February 2018 to May 2019 (Fig. 1). In phase 1 (the first round Delphi), a nationwide questionnaire was published online to collect opinions on the core competencies that provided a basic perspective for the specialists training in neurocritical care. In phase 2, several rounds of voting were conducted by face-to-face NG meetings to generate a core competencies list. Then the minimum level of expertise, which is equated with the ability that should be attained at the end of training, was identified by one round of voting. During phase 3 (the second round Delphi), the draft was posted online for further comments.

### Patient and public involvement

There was no patient or public involvement in this study.

### Phase 1: generation and rearrangement competencies list (first round Delphi)

A list of potential core competencies was developed based on four previous publications, including the list introduced by the Competency-Based Training in Intensive Care Medicine in Europe Collaboration (CoBaTrICE) [6], the guidelines developed by UCNS [7], the Chinese College of Intensive and Critical Care Medicine (CCICCM) [9] and the Critical Care & Emergency Medicine fellowship core curriculum of AAN [10]. In principle, all core competencies proposed by the aforementioned publications were preserved, while the duplicated items were rearranged to simplify the list. Those items with a definition of the level of expertise were modified. For example, the items about shock in CCICCM (To recognize and manage different types of shock) and UCNS (Shock: hypotension) and its complications (vasodilatory and cardiogenic) were rewritten as “different types of shock” in the potential list. Furthermore, five items referring to the scoring system were added.

The potential competencies list was translated into Chinese and organized into an online questionnaire (<https://www.wjx.cn/jq/21776519.aspx>, accessed April 2, 2018), which comprised seven parts (general medical diseases, neurological diseases, monitoring practice, professionalism and system management, ethical and legal, research and certification, and scoring system). The respondents were asked to select “YES” or “NO” for each item. Respondents were also invited to answer an open question: “Which competencies are important for specialist training in neurocritical care, in addition to those listed above”.

The online questionnaire was disseminated via three types of media:

1  
2  
3 (1) Members of the NCCC-CACCP from each province were responsible for the distribution of the  
4 questionnaire via email, WeChat or website links.

5  
6  
7 (2) The questionnaire was posted on the official website of the Chinese Society of Critical Care  
8 Medicine (<http://www.cscem.org.cn>, accessed April 2, 2018).

9  
10 (3) The questionnaire was posted on the WeChat official account of the Department of Critical Care  
11 Medicine of Capital Medical University (<https://www.wjx.cn/jq/21776519.aspx>, accessed April 2,  
12 2018).

13  
14  
15  
16 The questionnaire was posted online for 90 days. After removing duplicate and meaningless responses  
17 from the “open question”, the remaining responses and all those items that received at least one “YES”  
18 response were generated into a formal list for the NG meeting.  
19  
20  
21

## 22 **Phase 2: NG ratings**

23  
24 The leaders of the NCCC-CACCP and the National Center for Healthcare Quality Management in  
25 Neurological Diseases were responsible for the establishment of NG. Considering the imbalance of  
26 medical resources in China, 11 NG members from different regions were invited, covering areas from  
27 economic development to underdevelopment (six provinces: Beijing, Shanghai, Shandong, Shanxi,  
28 Guangdong, Xinjiang). There were four neuro-intensivists with neurological/neurosurgical background,  
29 three general intensivists in charge of NICUs, two trainees who had completed training in neurocritical  
30 care, one respiratory therapist and one experienced neurocritical care nurse. A researcher was selected  
31 as the coordinator to facilitate the process.  
32  
33  
34  
35  
36  
37  
38

39 To improve efficiency, the first round of NG rating was conducted by sending the formal list generated  
40 after the online survey to the NG members by mail. All of the competencies were followed by the same  
41 question: “Is it important for specialists training in neurocritical care?” Meanwhile, the percentages of  
42 “YES” responses selected during the online questionnaire were provided. The NG members were asked  
43 to individually rate the importance of competencies using a 5-point Likert scale (ranging from 1  
44 representing very unimportant to 5 representing very important) [6], and to return the feedback in one  
45 week.  
46  
47  
48  
49  
50  
51  
52

53 The coordinator was in charge of analyzing the feedback of the questionnaires. Items achieving full  
54 consensus (100% NG members voting 4- or 5-point) were directly entered into the final list. Other  
55 undetermined items were emailed to the NG members one week before the plenary NG ratings. Data on  
56 personal and group ratings for each item during the first round were provided as well. The NG  
57  
58  
59  
60



1  
2  
3 members were requested to read these materials carefully and compare the differences between their  
4  
5 own opinions and those of other NG members.  
6

7 A face-to-face NG meeting was held on July 21, 2018 (the second round NG rating). Each NG member  
8  
9 was required to select at least the five most important items individually from those items entered in the  
10  
11 second round of ratings. Each NG member was asked to explain the reasons for selecting these items in  
12  
13 turn, and others were not allowed to interrupt during this process. Afterwards, an open discussion for  
14  
15 debate was conducted. During the meeting, the NG members were frequently reminded to consider the  
16  
17 resource disequilibrium of the national medical system and respect the opinions of the “vulnerable  
18  
19 members” such as trainees, nurses and respiratory therapists. Finally, each member rated the  
20  
21 importance of competencies independently, as in the first round. Items achieving full consensus entered  
22  
23 into the final list; otherwise, they were entered into the third round. The third and fourth rounds were  
24  
25 conducted in the same manner as the second round. Since no item achieved full consensus (100% NG  
26  
27 members voting 4- or 5-point) during the fourth round, the iteration ended. All the items that did not  
28  
29 achieve full consensus were eliminated. The resulting data from the previous rounds were presented to  
30  
31 the NG members during the meeting.

32 The fifth round NG rating was held on July 22, 2018. The NG members were required to identify the  
33  
34 minimum level of expertise for each competence item, which was defined at four levels: a, b, c and d  
35  
36 (selected from the generic descriptors, online supplementary appendix 1, Table S1) [6]. A simple  
37  
38 majority rule was implemented; that is, the level that gained the most votes was accepted as the final  
39  
40 choice. When the number of votes was the same, the lower level would be accepted. For example, if  
41  
42 five “b”, five “c” and one “d” were voted, the level “b” would be accepted as the minimum level of  
43  
44 expertise.

### 45 **Phase 3: comments and iterative review (second round Delphi)**

46  
47 The draft of the final list was delivered by three types of media, as with the first round of Delphi. All  
48  
49 participants who provided an email address during the online survey were contacted and invited to give  
50  
51 comments.  
52

### 53 **Development of the final set**

54  
55 After the three phases of the study, the final competence set was constructed as the statements were  
56  
57 made of three parts: “context”, “level of expertise” and “content of competence” (online supplementary  
58  
59 appendix 1, Table S2).  
60

1  
2  
3 The number of items in the final competence set was compared to those in guidelines and statements  
4 published by CoBaTrICE, UCNS, CCICCM and AAN.  
5  
6

### 7 **Statistical analysis**

8  
9 Categorical data were presented as number (percentage). Continuous data were presented as the median  
10 and the interquartile range (IQR). All data were analyzed using SPSS version 17.0.  
11  
12  
13  
14  
15  
16  
17  
18  
19  
20  
21  
22  
23  
24  
25  
26  
27  
28  
29  
30  
31  
32  
33  
34  
35  
36  
37  
38  
39  
40  
41  
42  
43  
44  
45  
46  
47  
48  
49  
50  
51  
52  
53  
54  
55  
56  
57  
58  
59  
60

For peer review only

## RESULTS

### Phase 1: generation and rearrangement competencies list (first round Delphi)

A total 1094 respondents from 33 administrative provinces (including Macao and Taiwan) participated in the first round of Delphi (**Table 1**). There were 916 (83.7%) respondents from tertiary hospitals, 536 (49.0%) of whom had been engaged in clinical practice for more than 10 years. Each item in the original online questionnaire won at least one vote, so all entered the NG rating. The open question received 394 additional suggestions, most of which had already been included in the original online questionnaire. Finally, 37 suggestions (22 relating to knowledge and skills and 15 relating to the scoring system) were included in the formal list after careful consideration. Following the rule that we not delete items but only analyze and integrate them, a formal list containing 329 statements was ultimately generated for the following NG ratings (online supplementary appendix 1, Table S3 and S4).

### Phase 2: NG ratings

During the first round of ratings, 138 (41.8%) items achieved full consensus. Then, 52 (15.8%) and eight (2.4%) items were elected during the second and third rounds, respectively. In the fourth round, no additional items achieved full consensus; therefore, the rating was terminated. Finally, a list containing 198 items was generated (online supplementary appendix 1, Table S3). Another 131 items that did not reach full consensus were eliminated (online supplementary appendix 1, Table S4).

The minimum level of expertise was identified in the fifth round of rating. Following the established rules, most items were rated as level “c” (159, 80.3%), with one “a” (0.5%), 28 “b” (14.1%) and 10 “d” (5.0%) ratings. Nineteen items had the same rating results in two levels of expertise, and the lower level was accepted as the final level. For example, the item “9.5 Describes burns and electrical injury” was voted as five “a”, five “b” and one “c”. According to the rule, the level “a” was accepted.

### Phase 3: comments and iterative review (second round of Delphi)

There were 111 replies received from 27 provinces (Table 1). No new competencies were proposed during this phase, so no change was made to the final competency list. It is worth noted that many participants expressed their urgent demand for standardized neurointensive training.

### Development of the final set

The final competence set comprised 198 competency statements divided into seven parts (**Fig. 2**).

Appendix in online supplementary appendix 2 shows the final competences list.

1  
2  
3 The number of items in the final competence set (n=198) was more than the number in CoBaTrICE  
4 (n=102), CSCCM (n=129) and AAN (n=66) but was less than the number in UCNS (n=289) (**Fig. 3**).  
5  
6  
7  
8  
9  
10  
11  
12  
13  
14  
15  
16  
17  
18  
19  
20  
21  
22  
23  
24  
25  
26  
27  
28  
29  
30  
31  
32  
33  
34  
35  
36  
37  
38  
39  
40  
41  
42  
43  
44  
45  
46  
47  
48  
49  
50  
51  
52  
53  
54  
55  
56  
57  
58  
59  
60

For peer review only

## DISCUSSION

Based on past guidelines, we used consensus techniques, i.e., the modified Delphi method and NG technique, to develop a set of 198 core competencies for fundamental neurocritical care training in China. To the best of our knowledge, this is the first time that consensus techniques have been applied to the development of core competencies of neurocritical care in China.

The Delphi method and NG technique are the most commonly employed techniques for developing consensus [11]. These methods have been used successfully in critical care medicine, for instance, to identify the core competencies of critical care in Europe [6] and China [9] and to establish national research priorities of critical care in the UK [12]. The Delphi method is used to collect opinions and evaluate rating results. This technique was initially described by the RAND Air Force Corporation in America in the 1950s [13]. In the field of medical education, more than three quarters of publications using consensus techniques adopted the Delphi and modified Delphi [14]. This methodology permits individual thinking. Feedback is provided after each round so that revisions can be made. The NG technique is employed to select the most important items and define the minimum level of expertise. During face-to-face ratings, the interaction is controlled by a coordinator so that all participants have opportunities to express their views and the dominance of one or two vocal members can be avoided [11]. Later, the free period allows for more expression of ideas and discussions. The design of our study shares many similarities with CoBaTrICE [6], except for one step order. In our study, we adhered the principle that determining the core competencies is the top priority. The most important items were voted on prior to the determination of the minimum level of expertise. The purpose of this adjustment was to avoid the potential influence of the minimum level of expertise on the voting process on the importance of the competencies. For example, if the item was previously categorized as level “a”, it may have been interpreted as “unimportant” and ruled out during the voting on importance.

The number of our items was significantly reduced compared to UCNS [7] (**Fig. 3**). The main reason is that we wanted to obtain a basic list with the greatest consensus. Therefore, only those competencies agreed on by all NG members were included. For example, one NG member insisted that research capacity was not essential for junior physicians. Under the established admission criteria, most items relevant to research capacity were ruled out. In addition, the differences in the professional backgrounds of the NG members lead to divergences. For example, some NG members with a neuroscience background believed that the ultrasound technique was not so important, while NG

1  
2  
3 members specialized in general critical care insisted that ultrasound was an essential skill for clinical  
4 practice. This phenomenon may be associated with the popularity of ultrasound in the two specialties  
5 [15,16]. After repeated discussions, three items were admitted in the third round (pleural effusion and  
6 ascites localization, assesses inferior caval vein, and vascular localization), although more advanced  
7 techniques such as lung ultrasound and echocardiography were excluded. Compared with CSCCM [9],  
8 our list not only added a large number of neurological items but also added some items related to  
9 systemic diseases related to neuroscience to adapt to neurocritical care training. More than 30 items  
10 related to general critical care were deleted, such as “Manages continuous renal replacement therapy”.  
11 Furthermore, the 15 newly added items were all from the first round of Delphi, which highlighted the  
12 importance of the Delphi method and avoided the loss of important items.

13 Neurocritical care is an interdisciplinary specialty involving neuroscience and critical care medicine  
14 [17,18]. In China, NICUs fall under different departments and are managed by neurosurgeons,  
15 neurologists or intensivists [3]. The training requirements of different regions and backgrounds are  
16 highly diverse. An all-embracing competency list could be a burden for a training program and may  
17 decrease efficiency. Our lists selected essential fundamental competencies for physicians who had just  
18 finished neurocritical care training, regardless of whether a training program was based on  
19 neurosurgery, neurology, critical care medicine or other specialties related to neurocritical care.  
20 Training program directors may reorganize this list by adding core competencies for any special local  
21 training. Those items that had been ruled out during the NG process might serve as optional  
22 competencies.

23 There are some potential limitations in our study. First, we used WeChat as one of the media to  
24 disseminate online questionnaires to maximize the efficiency and enthusiasm of the participants.  
25 Therefore, it is inevitable that some feedback was of low quality and given without consideration.  
26 Fortunately, among more than one thousand respondents, the proportion of low-quality responses was  
27 quite low, so there was not much impact on the final results. Second, although we had reminded the  
28 experts to pay attention to the opinions of vulnerable groups and the voting processes were  
29 independent, trainees, nurses and respiratory therapists were still less involved in the discussion. By  
30 analyzing the questionnaires, we could not rule out the suspicion of conformity in the selection of some  
31 items. Third, all of the NG members came from tertiary academic hospitals so they may not have  
32 represented the views of lower-grade hospitals. However, one-seventh of the replies were received  
33  
34  
35  
36  
37  
38  
39  
40  
41  
42  
43  
44  
45  
46  
47  
48  
49  
50  
51  
52  
53  
54  
55  
56  
57  
58  
59  
60

1  
2  
3 from lower-grade hospitals in Phase 1, which provided a reference for the NG meetings. In addition,  
4 the NG members were reminded to consider the resource disequilibrium during the voting processes.  
5  
6 Last, patients and their relatives were not invited to participate in our study, which therefore might  
7  
8 have lacked their opinions. However, the CoBaTrICE invited patients and their relatives to give their  
9  
10 opinions, and all these items were incorporated into our potential list.  
11  
12  
13  
14  
15  
16  
17  
18  
19  
20  
21  
22  
23  
24  
25  
26  
27  
28  
29  
30  
31  
32  
33  
34  
35  
36  
37  
38  
39  
40  
41  
42  
43  
44  
45  
46  
47  
48  
49  
50  
51  
52  
53  
54  
55  
56  
57  
58  
59  
60

For peer review only

## CONCLUSIONS

In summary, by using consensus techniques, we have developed a list of core competencies for Chinese neurocritical care training that may serve as a reference for future specialist training programs.

For peer review only



## REFERENCES

1. Huang M, Wang J, Ni X, *et al*. Neurocritical care in china: past, present, and future. *World Neurosurg* 2016;95:502-6.
2. Wang J, Bai L, Shi M, *et al*. Trends in age of first-ever stroke following increased incidence and life expectancy in a low-income chinese population. *Stroke* 2016;47:929-35.
3. Su YY, Wang M, Feng HH, *et al*. An overview of neurocritical care in China: a nationwide survey. *Chin Med J (Engl)* 2013;126:3422-6.
4. Dhar R, Rajajee V, Finley CA, *et al*. The state of neurocritical care fellowship training and attitudes toward accreditation and certification: a survey of neurocritical care fellowship program directors. *Front Neurol* 2017;8:548.
5. National Health Commission of the People's Republic of China: recommendation for conducting specialist training program in China. 2016 <http://www.nhc.gov.cn/qjjys/s3593/201601/0ae28a6282a34c4e93cd7bc576a51553.shtml> (accessed 29 May 2019).
6. Bion JF, Barrett H. Development of core competencies for an international training programme in intensive care medicine. *Intensive Care Med* 2006;32:1371-83.
7. Mayer SA, Coplin WM, Chang C, *et al*. Neurocritical Care Society; American Academy of Neurology Section on Critical Care and Emergency Neurology; Society of Neurosurgical Anesthesia and Critical care: core curriculum and competencies for advanced training in neurological intensive care: United Council for Neurologic Subspecialties guidelines. *Neurocrit Care* 2006;5:159-65.
8. Cohen AS, Izzy S, Kumar MA, *et al*. Education research: variation in priorities for neurocritical care education expressed across role groups. *Neurology* 2018;90:1117-22.
9. Hu X, Xi X, Ma P, *et al*. Consensus development of core competencies in intensive and critical care medicine training in China. *Crit Care* 2016;20:330.
10. American Academy of Neurology: Critical Care & Emergency Medicine Fellowship Core Curriculum. 2019 <https://www.aan.com/tools-and-resources/academic-neurologists-researchers/program-and-fellowship-director-resources/aan-core-curricula/> (accessed 29 May 2019).
11. Murphy MK, Black NA, Lamping DL, *et al*. Consensus development methods, and their use in clinical guideline development. *Health Technol Assess* 1998;2:1-88.

12. Goldfrad C, Vella K, Bion JF, *et al*. Research priorities in critical care medicine in the UK. *Intensive Care Med* 2000;26:1480-88.
13. Helmer O, Dalkey N. An experimental application of the Delphi method to the use of experts. *Manage Sci* 1963;9:458-67.
14. Humphrey-Murto S, Varpio L, Wood TJ, *et al*. The use of the Delphi and other consensus group methods in medical education research: a review. *Acad Med* 2017;92:1491-98.
15. Wong A, Galarza L, Duska F. Critical care ultrasound: a systematic review of international training competencies and program. *Crit Care Med* 2019;47:e256-62.
16. Rajajee V, Díaz-Gómez JL. Critical care ultrasound should be a priority first-line assessment tool in neurocritical care. *Crit Care Med* 2019;47:833-6.
17. Markandaya M, Thomas KP, Jahromi B, *et al*. The role of neurocritical care: a brief report on the survey results of neurosciences and critical care specialists. *Neurocrit Care* 2012;16:72-81.
18. Martin A, Chen ML, Chatterjee A, *et al*. Specialty classifications of physicians who provide neurocritical care in the United States. *Neurocrit Care* 2019;30:177-84.

1  
2  
3 **Contributors:** LZ and JXZ conceived the study. Statistical design and analysis were done by ZC and  
4 YMW. ZC, LZ and JXZ drafted the initial version of the manuscript. ZC, LG, QBH, LHL, BHQ, GZS,  
5  
6  
7  
8  
9  
10  
11  
12  
13  
14  
15  
16  
17  
18  
19  
20  
21  
22  
23  
24  
25  
26  
27  
28  
29  
30  
31  
32  
33  
34  
35  
36  
37  
38  
39  
40  
41  
42  
43  
44  
45  
46  
47  
48  
49  
50  
51  
52  
53  
54  
55  
56  
57  
58  
59  
60

the final version of the paper.

**Funding:** This study did not receive funding.

**Competing interests:** None declared.

**Patient consent:** Not required.

**Data sharing statement:** Data can be accessed by contacting the corresponding author on reasonable request.

## FIGURE LEGENDS

**Figure 1.** The study was conducted in three phases. In phase 1, a competencies list was generated and arranged during the first round of Delphi. In phase 2, five rounds of nominal group (NG) meetings were conducted to confirm the competencies list and levels of expertise. In phase 3, comments and iterative review were recirculated during the second round of Delphi.

**Figure 2.** The numbers of competencies categorized into seven different themes. The number of competencies entering the nominal group (NG) rating that were finally accepted are shown.

**Figure 3.** The intersection among the competencies list developed in the present study (n=198, blue circle) with other guidelines and statements, including the Competency Based Training in Intensive Care Medicine in Europe Collaboration (CoBaTrICE) (n=102, red circle), the Chinese Society of Critical Care Medicine (CSCCM) (n=129, green circle), the United Council for Neurologic Subspecialties (UCNS) (n=289, magenta circle) and the American Academy of Neurology (AAN) (n=66, orange circle).

**Table 1. The professional background of participants in Delphi**

| Specialist                               | First round Delphi | Second round Delphi |
|------------------------------------------|--------------------|---------------------|
| General intensivists                     | 412 (37.7%)        | 49 (44.1%)          |
| Neurosurgeons                            | 244 (22.3%)        | 18 (16.2%)          |
| Neurologists                             | 139 (12.7%)        | 9 (8.2%)            |
| Neuro-intensivists                       | 95 (8.7%)          | 22 (19.8%)          |
| Medical physicians (except neurologists) | 53 (4.8%)          | 6 (5.4%)            |
| Surgeons (except neurosurgeons)          | 25 (2.3%)          | 1 (0.9%)            |
| Emergency physicians                     | 20 (1.8%)          | 1 (0.9%)            |
| Anesthesiologists                        | 13 (1.2%)          | 1 (0.9%)            |
| Rehabilitation physicians                | 4 (0.4%)           | 0                   |
| Nurses                                   | 70 (6.4%)          | 2 (1.8%)            |
| Respiratory therapists                   | 7 (0.6%)           | 1 (0.9%)            |
| Medical students                         | 12 (1.1%)          | 1 (0.9%)            |
| Total                                    | 1094               | 111                 |

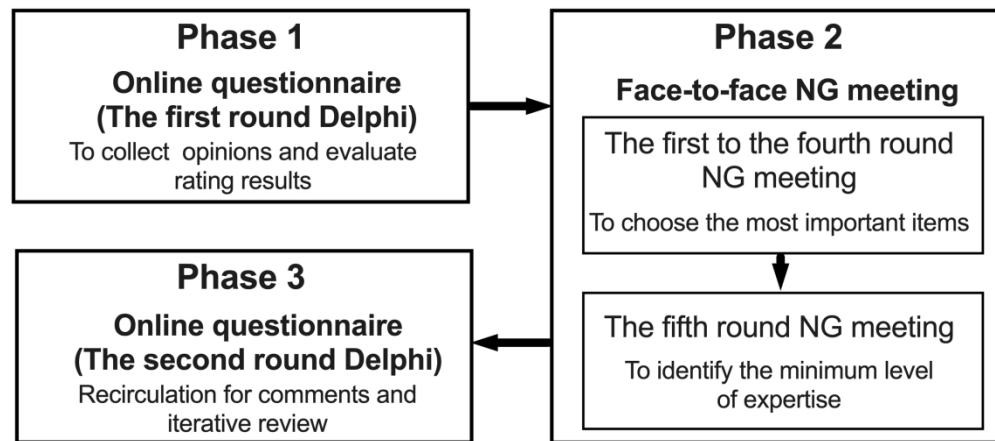

The study was conducted in three phases. In phase 1, a competencies list was generated and arranged during the first round of Delphi. In phase 2, five rounds of nominal group (NG) meetings were conducted to confirm the competencies list and levels of expertise. In phase 3, comments and iterative review were recirculated during the second round of Delphi.

213x93mm (300 x 300 DPI)

1  
2  
3  
4  
5  
6  
7  
8  
9  
10  
11  
12  
13  
14  
15  
16  
17  
18  
19  
20  
21  
22  
23  
24  
25  
26  
27  
28  
29  
30  
31  
32  
33  
34  
35  
36  
37  
38  
39  
40  
41  
42  
43  
44  
45  
46  
47  
48  
49  
50  
51  
52  
53  
54  
55  
56  
57  
58  
59  
60

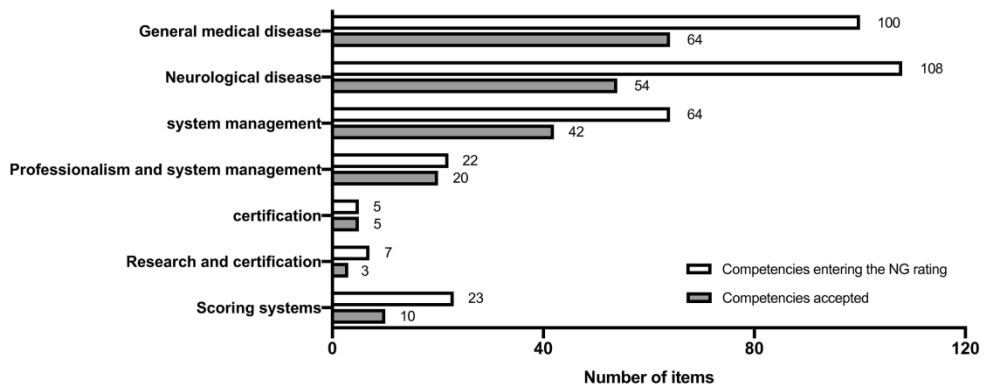

The numbers of competencies categorized into seven different themes. The number of competencies entering the nominal group (NG) rating that were finally accepted are shown.

247x99mm (300 x 300 DPI)

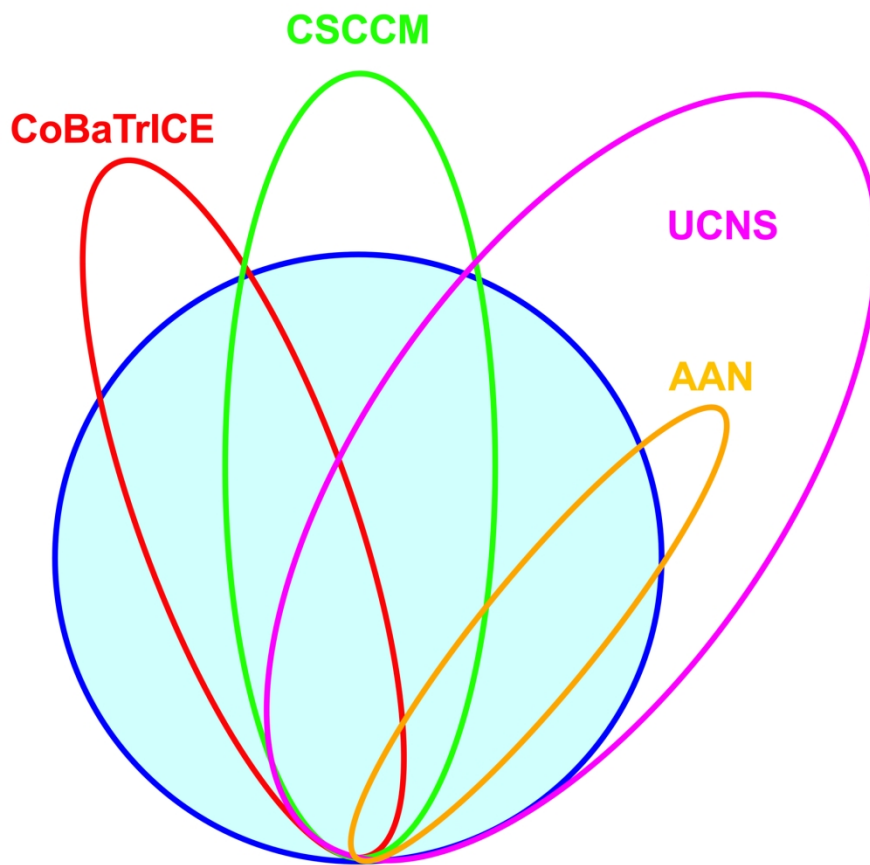

The intersection among the competencies list developed in the present study (n=198, blue circle) with other guidelines and statements, including the Competency Based Training in Intensive Care Medicine in Europe Collaboration (CoBaTrICE) (n=102, red circle), the Chinese Society of Critical Care Medicine (CSCCM) (n=129, green circle), the United Council for Neurologic Subspecialties (UCNS) (n=289, magenta circle) and the American Academy of Neurology (AAN) (n=66, orange circle).

177x172mm (300 x 300 DPI)



1  
2  
3  
4  
5 **Core competencies in neurocritical care training in China: consensus developed by a national Delphi consensus survey combined with**  
6  
7 **nominal group technique**  
8

9 Zhen Cui, MD, Liang Gao, MD, Qi-Bing Huang, MD, Li-Hong Li, MD, Bing-Hui Qiu, MD, Guang-Zhi Shi, MD, PhD, Xiang-You Yu, MD, Yan Wang, BS, Li Zhang, RN, Yu-Mei Wang, MD, Linlin Zhang, MD,  
10 PhD, Jian-Xin Zhou, MD, PhD, on behalf of the Working Group from Neuro-Critical Care Committee affiliated to the Chinese Association of Critical Care Physicians and the National Center for Healthcare Quality  
11 Management in Neurological Diseases.  
12  
13

14  
15 **Online Supplementary Appendix 1**  
16

17 Contents

18 Table S1. The minimum level of expertise at the end of neurocritical care specialist training

19 Table S2. Constructing a competence statement

20 Table S3. Accepted items in the core competencies required for neurocritical care specialists and the supporting rate for each item

21 Table S4. Eliminated items during nominal group meeting  
22  
23  
24  
25  
26  
27  
28  
29  
30  
31  
32  
33  
34  
35  
36  
37  
38  
39  
40  
41  
42  
43  
44  
45  
46

**Table S1. The minimum level of expertise at the end of neurocritical care specialist training**

| Levels | Descriptions                                                                           |
|--------|----------------------------------------------------------------------------------------|
| a      | Has knowledge of (describes) ...                                                       |
| b      | Performs (manages, conducts, demonstrates, assesses, interprets) ... under supervision |
| c      | Performs (manages, conducts, demonstrates, assesses, interprets) ... independently     |
| d      | Teaches or supervises others to perform (manages) ...                                  |

1  
2  
3  
4  
5  
6  
7  
8  
9  
10  
11  
12  
13  
14  
15  
16  
17  
18  
19  
20  
21  
22  
23  
24  
25  
26  
27  
28  
29  
30  
31  
32  
33  
34  
35  
36  
37  
38  
39  
40  
41  
42  
43  
44  
45  
46

**Table S2. Constructing a competence statement**

|                       |                                                                             |                                                                              |                                      |                                                                  |
|-----------------------|-----------------------------------------------------------------------------|------------------------------------------------------------------------------|--------------------------------------|------------------------------------------------------------------|
| Context               | By the end of neurocritical care training, the trainee should be able to... |                                                                              |                                      |                                                                  |
| Level of expertise    | Level "a"<br>Has knowledge of (describes)...                                | Level "b"<br>Manages...under supervision                                     | Level "c"<br>Manages...independently | Level "d"<br>Teaches or supervises others to perform (manage)... |
|                       | Describes...                                                                | Manages...<br>Conducts...<br>Demonstrates...<br>Assesses...<br>Interprets... |                                      | Teaches...<br>Supervises...                                      |
| Content of competence | ...different types of shock...                                              |                                                                              |                                      |                                                                  |

1  
2  
3  
4  
5  
6  
7  
8  
9  
10  
11  
12  
13  
14  
15  
16  
17  
18  
19  
20  
21  
22  
23  
24  
25  
26  
27  
28  
29  
30  
31  
32  
33  
34  
35  
36  
37  
38  
39  
40  
41  
42  
43  
44  
45  
46

---

|         |                                                                                                                                       |
|---------|---------------------------------------------------------------------------------------------------------------------------------------|
| Example | By the end of neurocritical care training, the trainee should be able to recognize and manage different types of shock independently. |
|---------|---------------------------------------------------------------------------------------------------------------------------------------|

---

For peer review only

Table S3. Accepted items in the core competencies required for neurocritical care specialists and the supporting rate for each item

| Domain                         | Competency statement                     | Online survey (%) | Source*    | Agreement during round 1 to 4 NG rating (%) |         |         |         | Minimum level of expertise identified during round 5 NG meeting ‡ |
|--------------------------------|------------------------------------------|-------------------|------------|---------------------------------------------|---------|---------|---------|-------------------------------------------------------------------|
|                                |                                          |                   |            | Round 1                                     | Round 2 | Round 3 | Round 4 |                                                                   |
| A. Neurological disease states |                                          |                   |            |                                             |         |         |         |                                                                   |
|                                | 1. Cerebrovascular diseases              |                   |            |                                             |         |         |         |                                                                   |
|                                | 1.1. Manages infarction and ischemia     |                   |            |                                             |         |         |         |                                                                   |
|                                | a. Massive hemispheric infarction        | 97.5              | <i>U/A</i> | 100                                         |         |         |         | c                                                                 |
|                                | b. Basilar artery occlusion and stenosis | 95.2              | <i>U/A</i> | 100                                         |         |         |         | c                                                                 |
|                                | c. Carotid artery occlusion and stenosis | 95.2              | <i>U/A</i> | 100                                         |         |         |         | c                                                                 |
|                                | d. Delayed cerebral ischemia             | -                 | <i>O</i>   | 100                                         |         |         |         | c                                                                 |
|                                | 1.2. Manages intracerebral hemorrhage    |                   |            |                                             |         |         |         |                                                                   |
|                                | a. Supratentorial                        | 94.7              | <i>U/A</i> | 91                                          | 100     |         |         | c                                                                 |
|                                | b. Cerebellar                            | 97.0              | <i>U/A</i> | 100                                         |         |         |         | c                                                                 |
|                                | c. Brainstem                             | 97.5              | <i>U/A</i> | 100                                         |         |         |         | c                                                                 |
|                                | d. Intraventricular                      | 97.0              | <i>U/A</i> | 100                                         |         |         |         | c                                                                 |

|    |                                             |      |              |     |     |
|----|---------------------------------------------|------|--------------|-----|-----|
| 1  |                                             |      |              |     |     |
| 2  |                                             |      |              |     |     |
| 3  |                                             |      |              |     |     |
| 4  |                                             |      |              |     |     |
| 5  | e. Subarachnoid hemorrhage - aneurysmal and | 97.0 | <i>U/A</i>   | 100 | c   |
| 6  | others                                      |      |              |     |     |
| 7  |                                             |      |              |     |     |
| 8  | 1.3 Manages arteriovenous malformations     | 95.6 | <i>U</i>     | 100 | c   |
| 9  |                                             |      |              |     |     |
| 10 | 1.4 Manages carotid-cavernous fistulae      | 80.9 | <i>U</i>     | 100 | c   |
| 11 |                                             |      |              |     |     |
| 12 | 1.5 Manages cervical and cerebral arterial  | 88.3 | <i>U</i>     | 100 | b   |
| 13 | dissections under supervision               |      |              |     |     |
| 14 |                                             |      |              |     |     |
| 15 |                                             |      |              |     |     |
| 16 | 2. Neurotrauma                              |      |              |     |     |
| 17 |                                             |      |              |     |     |
| 18 | 2.1 Manages traumatic brain injury          |      |              |     |     |
| 19 |                                             |      |              |     |     |
| 20 | a. Axonal shearing injury                   | 85.8 | <i>U/A</i>   | 91  | 100 |
| 21 |                                             |      |              |     | c   |
| 22 | b. Epidural hematoma                        | 96.1 | <i>U/A</i>   | 100 | c   |
| 23 |                                             |      |              |     |     |
| 24 | c. Subdural hematoma                        | 96.3 | <i>U/A</i>   | 100 | c   |
| 25 |                                             |      |              |     |     |
| 26 | d. Contusions and lacerations               | 95.7 | <i>U/A</i>   | 100 | c   |
| 27 |                                             |      |              |     |     |
| 28 | e. Penetrating craniocerebral injuries      | 92.4 | <i>U/A</i>   | 100 | c   |
| 29 |                                             |      |              |     |     |
| 30 | f. Traumatic SAH                            | 95.8 | <i>U/A</i>   | 100 | c   |
| 31 |                                             |      |              |     |     |
| 32 |                                             |      |              |     |     |
| 33 | 2.2. Manages spinal cord injury             | 95.1 | <i>U/A/C</i> | 100 | c   |
| 34 |                                             |      |              |     |     |
| 35 | 3. Status epilepticus                       |      |              |     |     |
| 36 |                                             |      |              |     |     |
| 37 |                                             |      |              |     |     |
| 38 |                                             |      |              |     |     |
| 39 |                                             |      |              |     |     |
| 40 |                                             |      |              |     |     |
| 41 |                                             |      |              |     |     |
| 42 |                                             |      |              |     |     |
| 43 |                                             |      |              |     |     |
| 44 |                                             |      |              |     |     |
| 45 |                                             |      |              |     |     |
| 46 |                                             |      |              |     |     |

|    |                                                                     |      |              |     |     |   |
|----|---------------------------------------------------------------------|------|--------------|-----|-----|---|
| 1  |                                                                     |      |              |     |     |   |
| 2  |                                                                     |      |              |     |     |   |
| 3  |                                                                     |      |              |     |     |   |
| 4  |                                                                     |      |              |     |     |   |
| 5  | 3.1 Manages convulsive status epilepticus                           | 97.8 | <i>U/A/C</i> | 100 |     | c |
| 6  |                                                                     |      |              |     |     |   |
| 7  | 3.2 Manages nonconvulsive status epilepticus                        | 89.0 | <i>U/A/C</i> | 100 |     | c |
| 8  |                                                                     |      |              |     |     |   |
| 9  | 3.3 Manages myoclonic epilepsy                                      | 91.7 | <i>U/A/C</i> | 100 |     | c |
| 10 |                                                                     |      |              |     |     |   |
| 11 | 4. Neuromuscular diseases                                           |      |              |     |     |   |
| 12 |                                                                     |      |              |     |     |   |
| 13 | 4.1 Manages myasthenia gravis                                       | 94.5 | <i>U/A</i>   | 100 |     | c |
| 14 |                                                                     |      |              |     |     |   |
| 15 | 4.2 Manages Guillain-Barré syndrome                                 | 88.3 | <i>U/A</i>   | 100 |     | c |
| 16 |                                                                     |      |              |     |     |   |
| 17 | 5. Infections                                                       |      |              |     |     |   |
| 18 |                                                                     |      |              |     |     |   |
| 19 | 5.1 Manages encephalitis (viral, bacterial,<br>parasitic)           | 97.5 | <i>U/A/C</i> | 100 |     | c |
| 20 |                                                                     |      |              |     |     |   |
| 21 | 5.2 Manages meningitis (viral, bacterial, parasitic)                | 98.5 | <i>U/A/C</i> | 100 |     | c |
| 22 |                                                                     |      |              |     |     |   |
| 23 | 5.3 Manages brain and spinal epidural abscess<br>under supervision  | 93.6 | <i>U/C</i>   | 100 |     | b |
| 24 |                                                                     |      |              |     |     |   |
| 25 | 6. Toxic-metabolic disorders                                        |      |              |     |     |   |
| 26 |                                                                     |      |              |     |     |   |
| 27 | 6.1 Manages drug overdose and withdrawal                            | 90.3 | <i>U/C/E</i> | 91  | 100 | c |
| 28 |                                                                     |      |              |     |     |   |
| 29 | 6.2 Manages temperature-related injuries                            | 93.6 | <i>U</i>     | 91  | 100 | c |
| 30 |                                                                     |      |              |     |     |   |
| 31 | 6.3 Manages carbon monoxide poisoning and<br>delayed encephalopathy | -    | <i>O</i>     | 73  | 100 | c |
| 32 |                                                                     |      |              |     |     |   |
| 33 |                                                                     |      |              |     |     |   |
| 34 |                                                                     |      |              |     |     |   |
| 35 |                                                                     |      |              |     |     |   |
| 36 |                                                                     |      |              |     |     |   |
| 37 |                                                                     |      |              |     |     |   |
| 38 |                                                                     |      |              |     |     |   |
| 39 |                                                                     |      |              |     |     |   |
| 40 |                                                                     |      |              |     |     |   |
| 41 |                                                                     |      |              |     |     |   |
| 42 |                                                                     |      |              |     |     |   |
| 43 |                                                                     |      |              |     |     |   |
| 44 |                                                                     |      |              |     |     |   |
| 45 |                                                                     |      |              |     |     |   |
| 46 |                                                                     |      |              |     |     |   |

## 7. Inflammatory and demyelinating diseases

|                                          |      |          |    |     |   |
|------------------------------------------|------|----------|----|-----|---|
| 7.1 Manages central pontine myelinolysis | 78.8 | <i>U</i> | 73 | 100 | c |
|------------------------------------------|------|----------|----|-----|---|

|                                            |   |          |    |     |   |
|--------------------------------------------|---|----------|----|-----|---|
| 7.2 Manages osmotic demyelination syndrome | - | <i>O</i> | 64 | 100 | c |
|--------------------------------------------|---|----------|----|-----|---|

## 8. Encephalopathies

|                                    |      |          |     |  |   |
|------------------------------------|------|----------|-----|--|---|
| 8.1 Manages hepatic encephalopathy | 91.9 | <i>U</i> | 100 |  | c |
|------------------------------------|------|----------|-----|--|---|

|                                             |      |          |     |  |   |
|---------------------------------------------|------|----------|-----|--|---|
| 8.2 Manages hypoxic-ischemic encephalopathy | 97.8 | <i>U</i> | 100 |  | c |
|---------------------------------------------|------|----------|-----|--|---|

|                                      |   |          |     |  |   |
|--------------------------------------|---|----------|-----|--|---|
| 8.3 Manages metabolic encephalopathy | - | <i>O</i> | 100 |  | c |
|--------------------------------------|---|----------|-----|--|---|

|                                                                                          |      |          |    |     |   |
|------------------------------------------------------------------------------------------|------|----------|----|-----|---|
| 8.4 Manages hypertensive encephalopathy and posterior reversible encephalopathy syndrome | 95.3 | <i>U</i> | 91 | 100 | c |
|------------------------------------------------------------------------------------------|------|----------|----|-----|---|

## 9. Neuroendocrine disorders

|                                |      |          |     |  |   |
|--------------------------------|------|----------|-----|--|---|
| 9.1 Manages pituitary apoplexy | 94.6 | <i>U</i> | 100 |  | c |
|--------------------------------|------|----------|-----|--|---|

|                                |      |          |     |  |   |
|--------------------------------|------|----------|-----|--|---|
| 9.2 Manages diabetes insipidus | 95.5 | <i>U</i> | 100 |  | c |
|--------------------------------|------|----------|-----|--|---|

|                                                                   |      |          |     |  |   |
|-------------------------------------------------------------------|------|----------|-----|--|---|
| 10. Manages movement disorders (severe dystonia and opisthotonos) | 91.6 | <i>U</i> | 100 |  | c |
|-------------------------------------------------------------------|------|----------|-----|--|---|

## 11. Clinical syndromes

|                                                       |      |              |     |  |   |
|-------------------------------------------------------|------|--------------|-----|--|---|
| 11.1 Teaches or supervises others in the Manages coma | 98.5 | <i>U/A/C</i> | 100 |  | d |
|-------------------------------------------------------|------|--------------|-----|--|---|



|    |                                              |      |              |     |     |   |
|----|----------------------------------------------|------|--------------|-----|-----|---|
| 1  |                                              |      |              |     |     |   |
| 2  |                                              |      |              |     |     |   |
| 3  |                                              |      |              |     |     |   |
| 4  |                                              |      |              |     |     |   |
| 5  | 11.2 Manages herniation syndromes            | 98.2 | <i>U/A</i>   | 100 |     | c |
| 6  |                                              |      |              |     |     |   |
| 7  | 11.3 Manages elevated intracranial pressure  | 97.7 | <i>U/C</i>   | 100 |     | c |
| 8  |                                              |      |              |     |     |   |
| 9  | 11.4 Manages intracranial                    |      |              |     |     |   |
| 10 | hypotension/hypovolemia                      | 95.9 | <i>U</i>     | 100 |     | c |
| 11 |                                              |      |              |     |     |   |
| 12 | 11.5 Manages hydrocephalus                   | 95.4 | <i>U/A</i>   | 100 |     | c |
| 13 |                                              |      |              |     |     |   |
| 14 | 11.6 Manages delirium                        | 98.1 | <i>U/A</i>   | 100 |     | c |
| 15 |                                              |      |              |     |     |   |
| 16 |                                              |      |              |     |     |   |
| 17 | 12. Manages perioperative neurosurgical care |      |              |     |     |   |
| 18 |                                              |      |              |     |     |   |
| 19 | 12.1 Manages postcraniotomy hypertension     | 96.1 | <i>U</i>     | 100 |     | c |
| 20 |                                              |      |              |     |     |   |
| 21 | 12.2 Manages postcraniotomy pain             | 93.3 | <i>U</i>     | 100 |     | c |
| 22 |                                              |      |              |     |     |   |
| 23 | 12.3 Manages wound cerebrospinal fluid leaks | 94.8 | <i>U</i>     | 91  | 100 | c |
| 24 |                                              |      |              |     |     |   |
| 25 | 12.4 Manages wound infections                | 95.6 | <i>U</i>     | 100 |     | c |
| 26 |                                              |      |              |     |     |   |
| 27 | 12.5 Manages postoperative brain edema       | 96.8 | <i>U/A</i>   | 100 |     | c |
| 28 |                                              |      |              |     |     |   |
| 29 | 12.6 Manages postcraniotomy intracranial     |      |              |     |     |   |
| 30 | hemorrhage                                   | 96.3 | <i>U</i>     | 100 |     | c |
| 31 |                                              |      |              |     |     |   |
| 32 |                                              |      |              |     |     |   |
| 33 | 12.7 Assesses and manages postcervical spine |      |              |     |     |   |
| 34 | surgery airway                               | 92.1 | <i>U</i>     | 100 |     | c |
| 35 |                                              |      |              |     |     |   |
| 36 | 12.8 Assesses and manages high-risk          | 96.8 | <i>U/C/E</i> | 100 |     | c |
| 37 |                                              |      |              |     |     |   |
| 38 |                                              |      |              |     |     |   |
| 39 |                                              |      |              |     |     |   |
| 40 |                                              |      |              |     |     |   |
| 41 |                                              |      |              |     |     |   |
| 42 |                                              |      |              |     |     |   |
| 43 |                                              |      |              |     |     |   |
| 44 |                                              |      |              |     |     |   |
| 45 |                                              |      |              |     |     |   |
| 46 |                                              |      |              |     |     |   |

1  
2  
3  
4  
5 neurosurgical patient postoperative

6  
7 13. Conducts neurorehabilitation 88.0 *U* 73 100 c

8  
9 B. General medical disease states

10  
11 1. Cardiovascular

12  
13 1.1 Recognizes and manages different types of  
14 shock 96.7 *U/C/E* 100 c

15  
16 1.2 Recognizes and manages myocardial  
17 infarction and unstable coronary syndromes 93.3 *U/C* 100

18  
19 1.3 Recognizes and manages neurogenic cardiac  
20 disturbances (electrocardiographic changes,  
21 stunned myocardium) 93.6 *U* 100 c

22  
23 1.4 Assesses and manages life-threatening  
24 arrhythmia 94.7 *U/C/E* 100 c

25  
26 1.5. Recognizes and manages left ventricular  
27 failure and/or acute pulmonary edema 95.0 *U/C* 100 c

28  
29 1.6. Recognizes and manages neurogenic  
30 pulmonary edema 94.7 *U* 100 c

31  
32 1.7 Recognizes and manages hypertension crisis 96.2 *U/C* 100 c

|    |                                                   |      |                |     |     |     |
|----|---------------------------------------------------|------|----------------|-----|-----|-----|
| 1  |                                                   |      |                |     |     |     |
| 2  |                                                   |      |                |     |     |     |
| 3  |                                                   |      |                |     |     |     |
| 4  |                                                   |      |                |     |     |     |
| 5  | 1.8 Performs and interprets cardiac output and    | 92.3 | <i>U/A/C/E</i> | 100 |     | c   |
| 6  | hemodynamic monitor                               |      |                |     |     |     |
| 7  |                                                   |      |                |     |     |     |
| 8  | 1.9 Performs electrocardiography and interprets   | 94.1 | <i>C/E</i>     | 91  | 100 | c   |
| 9  | the results                                       |      |                |     |     |     |
| 10 |                                                   |      |                |     |     |     |
| 11 | 2. Respiratory                                    |      |                |     |     |     |
| 12 |                                                   |      |                |     |     |     |
| 13 |                                                   |      |                |     |     |     |
| 14 | 2.1 Assesses and manages acute and chronic        | 97.8 | <i>U/C</i>     | 100 |     | c   |
| 15 | respiratory failure (type I and type II)          |      |                |     |     |     |
| 16 |                                                   |      |                |     |     |     |
| 17 | 2.2 Manages chronic obstructive pulmonary         | 94.2 | <i>U/C</i>     | 91  | 91  | 100 |
| 18 | disease and status asthmaticus under supervision  |      |                |     |     | b   |
| 19 |                                                   |      |                |     |     |     |
| 20 |                                                   |      |                |     |     |     |
| 21 | 2.3 Recognizes (diagnosis and grading) and        | 96.7 | <i>U/C/E</i>   | 100 |     | c   |
| 22 | manages acute respiratory distress syndrome       |      |                |     |     |     |
| 23 |                                                   |      |                |     |     |     |
| 24 | 2.4 Manages aspiration                            | 96.1 | <i>U</i>       | 100 |     | c   |
| 25 |                                                   |      |                |     |     |     |
| 26 | 2.5 Recognizes and manages upper airway           | 96.5 | <i>U/C</i>     | 100 |     | c   |
| 27 | obstruction                                       |      |                |     |     |     |
| 28 |                                                   |      |                |     |     |     |
| 29 |                                                   |      |                |     |     |     |
| 30 | 2.6 Recognizes and manages bronchopulmonary       | 97.4 | <i>U</i>       | 100 |     | c   |
| 31 | infections                                        |      |                |     |     |     |
| 32 |                                                   |      |                |     |     |     |
| 33 | 2.7 Recognizes and manages pleural diseases       | 92.4 | <i>U/C</i>     | 91  | 100 | c   |
| 34 | (empyema, effusion, pneumothorax)                 |      |                |     |     |     |
| 35 |                                                   |      |                |     |     |     |
| 36 | 2.8 Recognizes and manages neurogenic breathing   | 95.9 | <i>U</i>       | 91  | 100 | c   |
| 37 | patterns (central hyperventilation, Cheyne-Stokes |      |                |     |     |     |
| 38 |                                                   |      |                |     |     |     |
| 39 |                                                   |      |                |     |     |     |
| 40 |                                                   |      |                |     |     |     |
| 41 |                                                   |      |                |     |     |     |
| 42 |                                                   |      |                |     |     |     |
| 43 |                                                   |      |                |     |     |     |
| 44 |                                                   |      |                |     |     |     |
| 45 |                                                   |      |                |     |     |     |
| 46 |                                                   |      |                |     |     |     |

1  
2  
3  
4  
5 respirations, etc)

|    |                                                        |      |                |     |   |
|----|--------------------------------------------------------|------|----------------|-----|---|
| 6  |                                                        |      |                |     |   |
| 7  | 2.9 Assesses and manages thromboembolic                |      |                |     |   |
| 8  | disease (including pulmonary embolism) under           | 95.4 | <i>C</i>       | 100 | b |
| 9  | supervision                                            |      |                |     |   |
| 10 |                                                        |      |                |     |   |
| 11 | 2.10 Interprets chest radiographs                      | 95.0 | <i>U/C/E</i>   | 100 | c |
| 12 |                                                        |      |                |     |   |
| 13 | 2.11 Interprets chest CT image                         | 96.1 | <i>C</i>       | 100 | c |
| 14 |                                                        |      |                |     |   |
| 15 | 2.12 Performs and interprets end tidal CO <sub>2</sub> |      |                |     |   |
| 16 | monitoring                                             | 92.0 | <i>U</i>       | 100 | c |
| 17 |                                                        |      |                |     |   |
| 18 | 2.13 Performs and interprets arterial blood gas        |      |                |     |   |
| 19 | analysis                                               | 98.2 | <i>C/E</i>     | 100 | c |
| 20 |                                                        |      |                |     |   |
| 21 | 2.14 Manages noninvasive and invasive                  |      |                |     |   |
| 22 | mechanical ventilation: indication, rationale,         | 97.8 | <i>U/A/C/E</i> | 100 | c |
| 23 | complication, and weaning                              |      |                |     |   |
| 24 |                                                        |      |                |     |   |
| 25 | 3. Renal                                               |      |                |     |   |
| 26 |                                                        |      |                |     |   |
| 27 | 3.1 Assesses and manages fluid, electrolytes           |      |                |     |   |
| 28 | disorders                                              | 98.2 | <i>U/C/E</i>   | 100 | c |
| 29 |                                                        |      |                |     |   |
| 30 | 3.2 Recognizes (diagnosis and grading) and             |      |                |     |   |
| 31 | manages acute kidney injury                            | 95.8 | <i>U/C/E</i>   | 100 | c |
| 32 |                                                        |      |                |     |   |
| 33 | 3.3 Recognizes and manages derangements                |      |                |     |   |
| 34 | secondary to alterations in osmolality and             | 96.3 | <i>U</i>       | 100 | c |
| 35 |                                                        |      |                |     |   |
| 36 |                                                        |      |                |     |   |
| 37 |                                                        |      |                |     |   |
| 38 |                                                        |      |                |     |   |
| 39 |                                                        |      |                |     |   |
| 40 |                                                        |      |                |     |   |
| 41 |                                                        |      |                |     |   |
| 42 |                                                        |      |                |     |   |
| 43 |                                                        |      |                |     |   |
| 44 |                                                        |      |                |     |   |
| 45 |                                                        |      |                |     |   |
| 46 |                                                        |      |                |     |   |

|    |                                                        |      |                |     |     |
|----|--------------------------------------------------------|------|----------------|-----|-----|
| 1  |                                                        |      |                |     |     |
| 2  |                                                        |      |                |     |     |
| 3  |                                                        |      |                |     |     |
| 4  |                                                        |      |                |     |     |
| 5  | electrolytes                                           |      |                |     |     |
| 6  |                                                        |      |                |     |     |
| 7  | 3.4 Manages acid–base disorders                        | 97.9 | <i>U/A/C</i>   | 100 | c   |
| 8  |                                                        |      |                |     |     |
| 9  | 3.5 Manages oliguria and polyuria                      | 97.0 | <i>U</i>       | 100 | c   |
| 10 |                                                        |      |                |     |     |
| 11 | 3.6 Manages rhabdomyolysis under supervision           | 96.5 | <i>U</i>       | 91  | 100 |
| 12 |                                                        |      |                |     |     |
| 13 | 3.7 Conducts drug dose adjustment in renal failure     | 93.9 | <i>U/C</i>     | 91  | 100 |
| 14 |                                                        |      |                |     |     |
| 15 | 3.8 Manages cerebral salt wasting                      | 96.3 | <i>U</i>       | 100 | c   |
| 16 |                                                        |      |                |     |     |
| 17 | 3.9 Manages syndrome of inappropriate                  |      |                |     |     |
| 18 | antidiuretic hormone                                   | 98.2 | <i>U</i>       | 91  | 100 |
| 19 |                                                        |      |                |     |     |
| 20 |                                                        |      |                |     |     |
| 21 | 4. Metabolic and endocrine effects of critical illness |      |                |     |     |
| 22 |                                                        |      |                |     |     |
| 23 | 4.1 Manages diabetes mellitus (ketotic and             |      |                |     |     |
| 24 | hyperglycemic hyperosmolar coma, hypoglycemia)         | 97.7 | <i>U/C</i>     | 100 | c   |
| 25 |                                                        |      |                |     |     |
| 26 | 4.2 Manages systemic inflammatory response             |      |                |     |     |
| 27 | syndrome                                               | 93.5 | <i>U</i>       | 100 | c   |
| 28 |                                                        |      |                |     |     |
| 29 | 4.3 Performs enteral/parenteral nutritional support    | 97.7 | <i>U/A/C/E</i> | 100 | c   |
| 30 |                                                        |      |                |     |     |
| 31 | 4.4 Manages pituitary crisis under supervision         | -    | <i>O</i>       | 73  | 100 |
| 32 |                                                        |      |                |     |     |
| 33 |                                                        |      |                |     |     |
| 34 | 5. Infectious disease                                  |      |                |     |     |
| 35 |                                                        |      |                |     |     |
| 36 | 5.1 Complies with infection control measures           | 97.0 | <i>U/C/E</i>   | 100 | c   |
| 37 |                                                        |      |                |     |     |
| 38 |                                                        |      |                |     |     |
| 39 |                                                        |      |                |     |     |
| 40 |                                                        |      |                |     |     |
| 41 |                                                        |      |                |     |     |
| 42 |                                                        |      |                |     |     |
| 43 |                                                        |      |                |     |     |
| 44 |                                                        |      |                |     |     |
| 45 |                                                        |      |                |     |     |
| 46 |                                                        |      |                |     |     |

|    |                                                   |      |              |     |     |   |
|----|---------------------------------------------------|------|--------------|-----|-----|---|
| 1  |                                                   |      |              |     |     |   |
| 2  |                                                   |      |              |     |     |   |
| 3  |                                                   |      |              |     |     |   |
| 4  |                                                   |      |              |     |     |   |
| 5  | 5.2 Performs antimicrobial agent selection and    | 97.1 | <i>U/C/E</i> | 100 |     | c |
| 6  | determines dose in critically ill patients        |      |              |     |     |   |
| 7  |                                                   |      |              |     |     |   |
| 8  | 5.3 Manages hospital acquired and opportunistic   | 97.8 | <i>U/A/C</i> | 100 |     | c |
| 9  | infections in the critically ill patient          |      |              |     |     |   |
| 10 |                                                   |      |              |     |     |   |
| 11 | 5.4 Assesses and manages fever in critically ill  | 97.2 | <i>U/C</i>   | 91  | 100 | c |
| 12 | patient                                           |      |              |     |     |   |
| 13 |                                                   |      |              |     |     |   |
| 14 |                                                   |      |              |     |     |   |
| 15 | 5.5 Conducts interpretation of antibiotic         | 96.9 | <i>U/E</i>   | 100 |     | c |
| 16 | concentrations and sensitivities                  |      |              |     |     |   |
| 17 |                                                   |      |              |     |     |   |
| 18 | 5.6 Recognizes and manages sepsis, severe sepsis, | 95.2 | <i>C/E</i>   | 100 |     | c |
| 19 | and septic shock                                  |      |              |     |     |   |
| 20 |                                                   |      |              |     |     |   |
| 21 |                                                   |      |              |     |     |   |
| 22 | 5.7 Recognizes and manages multi-drug resistance  | -    | <i>O</i>     | 100 |     | c |
| 23 | bacteria infection                                |      |              |     |     |   |
| 24 |                                                   |      |              |     |     |   |
| 25 | 5.8 Performs antimicrobial agent selection in     | -    | <i>O</i>     | 100 |     | c |
| 26 | neurological infections                           |      |              |     |     |   |
| 27 |                                                   |      |              |     |     |   |
| 28 |                                                   |      |              |     |     |   |
| 29 | 6. Acute hematologic disorders                    |      |              |     |     |   |
| 30 |                                                   |      |              |     |     |   |
| 31 | 6.1 Manages disseminated intravascular            | 97.3 | <i>U/C</i>   | 100 |     | b |
| 32 | coagulation under supervision                     |      |              |     |     |   |
| 33 |                                                   |      |              |     |     |   |
| 34 | 6.2 Conducts anticoagulation and fibrinolytic     | 96.8 | <i>U/A/C</i> | 100 |     | c |
| 35 | therapy                                           |      |              |     |     |   |
| 36 |                                                   |      |              |     |     |   |
| 37 |                                                   |      |              |     |     |   |
| 38 |                                                   |      |              |     |     |   |
| 39 |                                                   |      |              |     |     |   |
| 40 |                                                   |      |              |     |     |   |
| 41 |                                                   |      |              |     |     |   |
| 42 |                                                   |      |              |     |     |   |
| 43 |                                                   |      |              |     |     |   |
| 44 |                                                   |      |              |     |     |   |
| 45 |                                                   |      |              |     |     |   |
| 46 |                                                   |      |              |     |     |   |

|    |                                                     |      |              |     |     |   |
|----|-----------------------------------------------------|------|--------------|-----|-----|---|
| 1  |                                                     |      |              |     |     |   |
| 2  |                                                     |      |              |     |     |   |
| 3  |                                                     |      |              |     |     |   |
| 4  |                                                     |      |              |     |     |   |
| 5  | 6.3 Conducts blood component therapy                | 96.4 | <i>U/CE</i>  | 91  | 100 | c |
| 6  |                                                     |      |              |     |     |   |
| 7  | 6.4 Conducts hemostatic therapy                     | 96.8 | <i>U</i>     | 100 |     | c |
| 8  |                                                     |      |              |     |     |   |
| 9  | 6.5 Recognizes and manages hypercoagulable          |      |              |     |     |   |
| 10 | states under supervision                            | 95.8 | <i>U</i>     | 82  | 100 | b |
| 11 |                                                     |      |              |     |     |   |
| 12 | 6.6 Recognizes and manages traumatic                |      |              |     |     |   |
| 13 | coagulopathy                                        | 94.5 | <i>C</i>     | 91  | 100 | c |
| 14 |                                                     |      |              |     |     |   |
| 15 |                                                     |      |              |     |     |   |
| 16 | 7. Acute gastrointestinal and genitourinary         |      |              |     |     |   |
| 17 | disorders                                           |      |              |     |     |   |
| 18 |                                                     |      |              |     |     |   |
| 19 | 7.1 Assesses and manages gastrointestinal           |      |              |     |     |   |
| 20 | bleeding                                            | 97.7 | <i>U/C</i>   | 91  | 100 | c |
| 21 |                                                     |      |              |     |     |   |
| 22 | 7.2 Prescribes stress ulcer prophylaxis             | 96.4 | <i>C</i>     | 91  | 100 | c |
| 23 |                                                     |      |              |     |     |   |
| 24 | 7.3 Assesses and manages abdominal                  |      |              |     |     |   |
| 25 | compartment syndrome                                | 96.4 | <i>U/C</i>   | 82  | 100 | c |
| 26 |                                                     |      |              |     |     |   |
| 27 |                                                     |      |              |     |     |   |
| 28 | 8. Immunology and transplantation                   |      |              |     |     |   |
| 29 |                                                     |      |              |     |     |   |
| 30 | 8.1 Interprets principles of transplantation (brain |      |              |     |     |   |
| 31 | death, organ donation, procurement, maintenance     | 85.5 | <i>U/A/E</i> | 73  | 100 | b |
| 32 | of organ donors, implantation) under supervision    |      |              |     |     |   |
| 33 |                                                     |      |              |     |     |   |
| 34 |                                                     |      |              |     |     |   |
| 35 | 9. General trauma and burns                         |      |              |     |     |   |
| 36 |                                                     |      |              |     |     |   |
| 37 |                                                     |      |              |     |     |   |
| 38 |                                                     |      |              |     |     |   |
| 39 |                                                     |      |              |     |     |   |
| 40 |                                                     |      |              |     |     |   |
| 41 |                                                     |      |              |     |     |   |
| 42 |                                                     |      |              |     |     |   |
| 43 |                                                     |      |              |     |     |   |
| 44 |                                                     |      |              |     |     |   |
| 45 |                                                     |      |              |     |     |   |
| 46 |                                                     |      |              |     |     |   |

|    |                                                 |      |              |     |     |     |
|----|-------------------------------------------------|------|--------------|-----|-----|-----|
| 1  |                                                 |      |              |     |     |     |
| 2  |                                                 |      |              |     |     |     |
| 3  |                                                 |      |              |     |     |     |
| 4  |                                                 |      |              |     |     |     |
| 5  | 9.1 Assesses and provides initial management of | 93.8 | <i>U/C/E</i> | 91  | 100 | c   |
| 6  | trauma patient                                  |      |              |     |     |     |
| 7  |                                                 |      |              |     |     |     |
| 8  | 9.2 Manages spine and pelvis trauma             | 91.0 | <i>U</i>     | 82  | 100 | c   |
| 9  |                                                 |      |              |     |     |     |
| 10 | 9.3 Manages chest and abdominal trauma          | 91.0 | <i>U</i>     | 91  | 100 | c   |
| 11 |                                                 |      |              |     |     |     |
| 12 | 9.4 Manages crush syndrome                      | -    | <i>O</i>     | 91  | 100 | c   |
| 13 |                                                 |      |              |     |     |     |
| 14 | 9.5 Describes burns and electrical injury       | 86.4 | <i>U/E</i>   | 64  | 82  | 100 |
| 15 |                                                 |      |              |     |     | a   |
| 16 |                                                 |      |              |     |     |     |
| 17 | 10. Transport                                   |      |              |     |     |     |
| 18 |                                                 |      |              |     |     |     |
| 19 | 10.1 Teaches or supervises patient assessment   | 97.4 | <i>C/E</i>   | 100 |     | d   |
| 20 | before transport                                |      |              |     |     |     |
| 21 |                                                 |      |              |     |     |     |
| 22 | 10.2 Prepares equipment for transport           | 95.9 | <i>C</i>     | 100 |     | c   |
| 23 |                                                 |      |              |     |     |     |
| 24 | 10.3 Performs intrahospital transport           | 96.8 | <i>C</i>     | 100 |     | c   |
| 25 |                                                 |      |              |     |     |     |
| 26 |                                                 |      |              |     |     |     |
| 27 | 11.Others                                       |      |              |     |     |     |
| 28 |                                                 |      |              |     |     |     |
| 29 | 11.1 Assesses and manages multiorgan            | 93.5 | <i>C</i>     | 100 |     | c   |
| 30 | dysfunction syndrome                            |      |              |     |     |     |
| 31 |                                                 |      |              |     |     |     |
| 32 | 11.2 Manages ICU acquired weakness under        | -    | <i>O</i>     | 82  | 100 | b   |
| 33 | supervision                                     |      |              |     |     |     |
| 34 |                                                 |      |              |     |     |     |

C. Critical care monitoring practical procedures



## 1. Monitoring

|                                                                                                                                          |      |                |     |     |   |
|------------------------------------------------------------------------------------------------------------------------------------------|------|----------------|-----|-----|---|
| 1.1 Performs neuromonitoring                                                                                                             | 96.1 | <i>U</i>       | 100 |     | c |
| 1.2 Interprets principles of ECG monitoring                                                                                              | 98.2 | <i>U</i>       | 100 |     | c |
| 1.3 Performs and interprets invasive hemodynamic monitor                                                                                 | 95.2 | <i>U/C</i>     | 100 |     | c |
| 1.4 Performs and interprets noninvasive hemodynamic monitor                                                                              | 95.4 | <i>U/C</i>     | 100 |     | c |
| 1.5 Performs and interprets respiratory mechanics monitor under supervision                                                              | 95.4 | <i>U/C</i>     | 100 |     | b |
| 1.6 Performs and interprets metabolic monitoring under supervision (oxygen consumption, carbon dioxide production, respiratory quotient) | 94.3 | <i>U</i>       | 100 |     | b |
| 1.7 Conducts multimodality monitoring in NICU                                                                                            | 95.2 | <i>U</i>       | 91  | 100 | c |
| 2. General critical care practical procedures and therapeutic interventions                                                              |      |                |     |     |   |
| 2.1 Performs arterial catheterization                                                                                                    | 96.2 | <i>U/A/C/E</i> | 73  | 100 | c |
| 2.2 Teaches or supervises others central venous catheter insertion                                                                       | 96.4 | <i>U/A/C/E</i> | 100 |     | d |
| 2.3 Conducts vasoactive/inotropic medication therapy                                                                                     | 97.4 | <i>U/C/E</i>   | 100 |     | c |

|                                                                                                                                                                               |      |                |     |     |   |
|-------------------------------------------------------------------------------------------------------------------------------------------------------------------------------|------|----------------|-----|-----|---|
| 2.4 Teaches or supervises others to perform cardiopulmonary resuscitation, postresuscitation brain protection, to provide advanced life support for postresuscitation patient | 98.2 | <i>U/CE</i>    | 100 |     | d |
| 2.5 Teaches or supervises others to perform cardioversion and defibrillation                                                                                                  | 98.1 | <i>C/E</i>     | 100 |     | d |
| 2.6 Performs airway maintenance and ventilation in nonintubated/unconscious patients                                                                                          | 97.4 | <i>U/A/C/E</i> | 100 |     | c |
| 2.7 Performs tracheal intubation                                                                                                                                              | 96.7 | <i>U/A/C</i>   | 100 |     | c |
| 2.8 Performs difficult and failed airway management                                                                                                                           | 90.7 | <i>E</i>       | 100 |     | c |
| 2.9 Performs and interprets intra-abdominal pressure monitor                                                                                                                  | 88.6 | <i>C</i>       | 73  | 100 | c |
| 2.10 Teaches or supervises others to perform tracheal aspiration                                                                                                              | 94.9 | <i>C/E</i>     | 82  | 100 | d |
| 2.11 Teaches or supervises others to perform oxygen therapy                                                                                                                   | 97.4 | <i>C/E</i>     | 100 |     | d |
| 2.12 Performs fiberoptic bronchoscopy and bronchoalveolar lavage in the intubated patient under supervision                                                                   | 92.0 | <i>U/E</i>     | 91  | 100 | b |
| 2.13 Explains and performs recruitment maneuver: principle and practice under supervision                                                                                     | 93.4 | <i>C</i>       | 100 |     | b |

1  
2  
3  
4  
5  
6  
7  
8  
9  
10  
11  
12  
13  
14  
15  
16  
17  
18  
19  
20  
21  
22  
23  
24  
25  
26  
27  
28  
29  
30  
31  
32  
33  
34  
35  
36  
37  
38  
39  
40  
41  
42  
43  
44  
45  
46

|      |                                                                                        |      |                |     |    |     |   |
|------|----------------------------------------------------------------------------------------|------|----------------|-----|----|-----|---|
| 2.14 | Performs thoracocentesis via a chest drain                                             | 91.0 | <i>U/C/E</i>   | 100 |    |     | c |
| 2.15 | Performs percutaneous tracheostomy                                                     | 91.2 | <i>U/E</i>     | 100 |    |     | c |
| 2.16 | Performs bedside ultrasound to localize pleural effusion and ascites under supervision | 89.9 | <i>C</i>       | 73  | 82 | 100 | b |
| 2.17 | Assesses inferior caval vein by ultrasound under supervision                           | -    | <i>O</i>       | 82  | 91 | 100 | b |
| 2.18 | Performs ultrasound techniques for vascular localization                               | 89.9 | <i>E</i>       | 73  | 82 | 100 | c |
| 2.19 | Performs thyrocriocentesis under supervision                                           | -    | <i>O</i>       | 82  | 91 | 100 | b |
| 3.   | Neurocritical care practical procedures and therapeutic interventions                  |      |                |     |    |     |   |
| 3.1  | Performs lumbar puncture                                                               | 93.8 | <i>U/A/C/E</i> | 100 |    |     | c |
| 3.2  | Performs shunt and ventricular drain tap for CSF sampling                              | 94.1 | <i>U</i>       | 100 |    |     | c |
| 3.3  | Manages external ventricular drains                                                    | 93.8 | <i>U</i>       | 100 |    |     | c |
| 3.4  | Assesses and manages pain of neurocritical care patients                               | 96.2 | <i>U/A/C/E</i> | 100 |    |     | c |
| 3.5  | Assesses sedation and describes principle                                              | 97.0 | <i>U/A/C</i>   | 100 |    |     | c |
| 3.6  | Interprets and manages of ICP and cerebral perfusion                                   | 94.5 | <i>U/A</i>     | 100 |    |     | c |

1  
2  
3  
4  
5 pressure data

|    |                                                            |      |            |     |     |     |
|----|------------------------------------------------------------|------|------------|-----|-----|-----|
| 6  |                                                            |      |            |     |     |     |
| 7  | 3.7 Interprets of saturation of jugular venous oxygenation | 86.9 | <i>U</i>   | 73  | 100 | b   |
| 8  | and brain tissue oxygen data under supervision             |      |            |     |     |     |
| 9  |                                                            |      |            |     |     |     |
| 10 | 3.8 Performs systemic moderate hypothermia under           | 95.4 | <i>U</i>   | 100 |     | b   |
| 11 | supervision                                                |      |            |     |     |     |
| 12 |                                                            |      |            |     |     |     |
| 13 | 3.9 Manages fluid and conducts osmotic dehydration         | 96.3 | <i>O</i>   | 100 |     | c   |
| 14 | treatment                                                  |      |            |     |     |     |
| 15 |                                                            |      |            |     |     |     |
| 16 | 3.10 Performs and interprets cerebral multimodality        |      |            |     |     |     |
| 17 | monitoring (pH, partial pressure of carbon dioxide, laser  | 89.9 | <i>U/A</i> | 82  | 100 | b   |
| 18 | Doppler, microdialysis) under supervision                  |      |            |     |     |     |
| 19 |                                                            |      |            |     |     |     |
| 20 | 3.11 Performs lumbar drain insertion                       | 84.2 | <i>U</i>   | 82  | 100 | c   |
| 21 |                                                            |      |            |     |     |     |
| 22 | 3.12 Manages and inserts ICP monitoring                    | 87.4 | <i>U/A</i> | 82  | 100 | c   |
| 23 |                                                            |      |            |     |     |     |
| 24 | 3.13 Manages cerebral oximetric or perfusion monitoring    |      |            |     |     |     |
| 25 | under supervision                                          | 90.1 | <i>U/A</i> | 91  | 100 | b   |
| 26 |                                                            |      |            |     |     |     |
| 27 | 3.14 Performs brain ventricle puncture under supervision   | -    | <i>O</i>   | 91  | 100 | b   |
| 28 |                                                            |      |            |     |     |     |
| 29 | 3.15 Interprets CT/MRI of nervous system under             | 94.8 | <i>U</i>   | 73  | 82  | 100 |
| 30 | supervision                                                |      |            |     |     | b   |
| 31 |                                                            |      |            |     |     |     |
| 32 | 3.16 Chooses neuromuscular blockade and describes          | 88.6 | <i>C/E</i> | 82  | 82  | 100 |
| 33 | indication of it under supervision                         |      |            |     |     | b   |
| 34 |                                                            |      |            |     |     |     |
| 35 |                                                            |      |            |     |     |     |
| 36 |                                                            |      |            |     |     |     |
| 37 |                                                            |      |            |     |     |     |
| 38 |                                                            |      |            |     |     |     |
| 39 |                                                            |      |            |     |     |     |
| 40 |                                                            |      |            |     |     |     |
| 41 |                                                            |      |            |     |     |     |
| 42 |                                                            |      |            |     |     |     |
| 43 |                                                            |      |            |     |     |     |
| 44 |                                                            |      |            |     |     |     |
| 45 |                                                            |      |            |     |     |     |
| 46 |                                                            |      |            |     |     |     |

## D. Professionalism and system management

|                                                                                                                                                                          |      |                |     |     |   |
|--------------------------------------------------------------------------------------------------------------------------------------------------------------------------|------|----------------|-----|-----|---|
| 1. Gather accurate, essential information from all sources, including medical interviews, physical examinations, medical records and Laboratory and radiological results | 96.7 | <i>U/C/E</i>   | 100 |     | c |
| 2. Integrates clinical findings with laboratory investigations to form a differential diagnosis                                                                          | 97.1 | <i>U/C/E</i>   | 100 |     | c |
| 3. Involves patients (or their surrogates if applicable) in decisions about care and treatment (including informed consent and end-of-life care)                         | 96.9 | <i>U/A/C/E</i> | 100 |     | c |
| 4. Promotes collaborative practice principles, including multidisciplinary cooperation and effective team working                                                        | 97.0 | <i>U/E</i>     | 100 |     | c |
| 5. Ensures continuity of care through effective handover of clinical information                                                                                         | 97.7 | <i>C/E</i>     | 100 |     | c |
| 6. Describes implications of chronic and comorbid disease in the acutely ill patient                                                                                     | 93.5 | <i>C/E</i>     | 91  | 100 | c |
| 7. Seeks learning opportunities and integrates new knowledge into clinical practice                                                                                      | 98.2 | <i>U/C/E</i>   | 100 |     | c |
| 8. Applies knowledge to clinical problem solving, clinical decision making, and critical thinking.                                                                       | 98.3 | <i>U/E</i>     | 100 |     | c |
| 9. Develops a clinically applicable knowledge of the basic                                                                                                               | 98.1 | <i>U</i>       | 100 |     | c |

and clinical sciences that underlie the practice of  
neurointensive care

|                                                                                                                                     |      |              |     |     |   |
|-------------------------------------------------------------------------------------------------------------------------------------|------|--------------|-----|-----|---|
| 10. Provides effective and professional consultation to physicians and health care professionals of other specialty                 | 97.5 | <i>U</i>     | 100 |     | c |
| 11. Maintains accurate medical records and documentation                                                                            | 97.5 | <i>U/C/E</i> | 100 |     | c |
| 12. Communicates the continuing care requirements of patients at ICU discharge to health care professionals, patients and relatives | 96.9 | <i>E</i>     | 100 |     | b |
| 13. Manages the safe and timely discharge of patients from ICU                                                                      | 93.5 | <i>C/E</i>   | 100 |     | c |
| 14. Identifies and minimizes risk of critical incidents and adverse events                                                          | 97.5 | <i>C/E</i>   | 100 |     | c |
| 15. Recognizes and identifies deficiencies in peer performance                                                                      | 96.9 | <i>U</i>     | 91  | 100 | c |
| 16. Identifies environmental hazards and promotes safety for patients and staff                                                     | 97.3 | <i>C/E</i>   | 82  | 100 | c |
| 17. Communicates effectively with patients, relatives and members of the healthcare team                                            | 98.6 | <i>U/C/E</i> | 100 |     | c |
| 18. Respects privacy, dignity, confidentiality, and legal constraints on the use of patient data                                    | 98.3 | <i>U/C/E</i> | 100 |     | c |

1  
2  
3  
4  
5  
6  
7  
8  
9  
10  
11  
12  
13  
14  
15  
16  
17  
18  
19  
20  
21  
22  
23  
24  
25  
26  
27  
28  
29  
30  
31  
32  
33  
34  
35  
36  
37  
38  
39  
40  
41  
42  
43  
44  
45  
46

19. Demonstrates sensitivity and responsiveness to gender, age, culture, religion, sexual preference, socioeconomic status, beliefs, behaviors and an awareness of their impact on decision making

|      |            |     |   |
|------|------------|-----|---|
| 97.5 | <i>U/E</i> | 100 | c |
|------|------------|-----|---|

20. Demonstrates respect, compassion, integrity, and altruism in relationships with patients, families, and colleagues.

|      |          |     |   |
|------|----------|-----|---|
| 97.9 | <i>U</i> | 100 | c |
|------|----------|-----|---|

#### E. Ethical and legal aspects of critical care medicine

1. Evaluates death and dying, performs brainstem death testing under supervision

|      |              |     |   |
|------|--------------|-----|---|
| 98.0 | <i>U/A/E</i> | 100 | b |
|------|--------------|-----|---|

2. Manages palliative care of the critically ill patient, forgos life-sustaining treatment and orders not to resuscitate under supervision

|      |            |     |   |
|------|------------|-----|---|
| 96.7 | <i>U/E</i> | 100 | b |
|------|------------|-----|---|

3. Applies and describes practice to minimize the physical and psychosocial consequences of critical illness for patients and families under supervision

|      |            |     |   |
|------|------------|-----|---|
| 96.4 | <i>C/E</i> | 100 | b |
|------|------------|-----|---|

4. Formulates clinical decisions with respect for ethical and legal principles

|      |              |     |   |
|------|--------------|-----|---|
| 96.7 | <i>U/C/E</i> | 100 | c |
|------|--------------|-----|---|

5. Adheres to principles of confidentiality, scientific/academic integrity, and informed consent.

|      |          |     |   |
|------|----------|-----|---|
| 96.8 | <i>U</i> | 100 | c |
|------|----------|-----|---|

#### F. Principles of research and certification

|    |                                                          |      |          |     |     |   |
|----|----------------------------------------------------------|------|----------|-----|-----|---|
| 1  |                                                          |      |          |     |     |   |
| 2  |                                                          |      |          |     |     |   |
| 3  |                                                          |      |          |     |     |   |
| 4  |                                                          |      |          |     |     |   |
| 5  | 1. Presentation preparation and skills                   | 90.7 | <i>U</i> | 73  | 100 | c |
| 6  |                                                          |      |          |     |     |   |
| 7  | 2. Certification                                         |      |          |     |     |   |
| 8  |                                                          |      |          |     |     |   |
| 9  | 2.1 Basic life support                                   | 96.2 | <i>C</i> | 100 |     | d |
| 10 |                                                          |      |          |     |     |   |
| 11 | 2.2 Advanced cardiac life support                        | 97.0 | <i>C</i> | 100 |     | c |
| 12 |                                                          |      |          |     |     |   |
| 13 | G. Scoring systems                                       |      |          |     |     |   |
| 14 |                                                          |      |          |     |     |   |
| 15 | 1. General status scoring                                |      |          |     |     |   |
| 16 |                                                          |      |          |     |     |   |
| 17 | 1.1 Acute physiology and chronic health evaluation II    | 95.1 | <i>C</i> | 100 |     | c |
| 18 |                                                          |      |          |     |     |   |
| 19 | 1.2 Simplified acute physiology score II                 | 89.2 | <i>C</i> | 73  | 100 | c |
| 20 |                                                          |      |          |     |     |   |
| 21 |                                                          |      |          |     |     |   |
| 22 | 2. Organs scoring:                                       |      |          |     |     |   |
| 23 |                                                          |      |          |     |     |   |
| 24 | 2.1 Acute kidney injury scoring (KDIGO)                  | 90.6 | -        | 73  | 100 | c |
| 25 |                                                          |      |          |     |     |   |
| 26 | 2.2 Sequential organ failure assessment                  | 89.5 | <i>C</i> | 91  | 100 | c |
| 27 |                                                          |      |          |     |     |   |
| 28 | 3. Sedation, pain and delirium scoring:                  |      |          |     |     |   |
| 29 |                                                          |      |          |     |     |   |
| 30 | 3.1 Critical care pain observation tool                  | 91.3 | -        | 100 |     | d |
| 31 |                                                          |      |          |     |     |   |
| 32 | 3.2 Richmond agitation-sedation scale                    | 94.9 | -        | 100 |     | c |
| 33 |                                                          |      |          |     |     |   |
| 34 | 3.3 The confusion assessment method for the diagnosis of |      |          |     |     |   |
| 35 | delirium in the ICU                                      | 92.8 | -        | 100 |     | c |
| 36 |                                                          |      |          |     |     |   |
| 37 |                                                          |      |          |     |     |   |
| 38 |                                                          |      |          |     |     |   |
| 39 |                                                          |      |          |     |     |   |
| 40 |                                                          |      |          |     |     |   |
| 41 |                                                          |      |          |     |     |   |
| 42 |                                                          |      |          |     |     |   |
| 43 |                                                          |      |          |     |     |   |
| 44 |                                                          |      |          |     |     |   |
| 45 |                                                          |      |          |     |     |   |
| 46 |                                                          |      |          |     |     |   |



1  
2  
3  
4  
5  
6  
7  
8  
9  
10  
11  
12  
13  
14  
15  
16  
17  
18  
19  
20  
21  
22  
23  
24  
25  
26  
27  
28  
29  
30  
31  
32  
33  
34  
35  
36  
37  
38  
39  
40  
41  
42  
43  
44  
45  
46

|                                               |      |          |     |     |   |
|-----------------------------------------------|------|----------|-----|-----|---|
| 3.4 Self-rating anxiety scale                 | 94.6 | <i>O</i> | 100 |     | c |
| 4. Neural system scoring                      |      |          |     |     |   |
| 4.1 Glasgow coma scale                        | 97.0 | -        | 100 |     | d |
| 4.2 National institute of health stroke scale | 89.8 | <i>O</i> | 82  | 100 | c |

---

\* Source of list: *U*: United Council for Neurologic Subspecialties, *A*: American Academy of Neurology, *C*: Chinese College of Intensive and Critical Care Medicine, *E*: Competency-based Training Programme in ICM for Europe, *O*: Online Delphi, -: during generation and rearrangement of competencies list before the first round of Delphi.

‡ Minimum level of expertise identified during the fifth round nominal group (NG) meeting:

- Level a: Has knowledge of (describes) ...
- Level b: Performs (manages, conducts, demonstrates, assesses, interprets) ... under supervision
- Level c: Performs (manages, conducts, demonstrates, assesses, interprets) ... independently
- Level d: Teaches or supervises others to perform (manages) ...

**Table S4. Eliminated items during nominal group meeting**

| Domain                         | Eliminated items                                     | Median (IQR) in the fourth round NG rating |
|--------------------------------|------------------------------------------------------|--------------------------------------------|
| A. Neurological disease states |                                                      |                                            |
|                                | 1. Cerebrovascular diseases                          |                                            |
|                                | 1.1 Infarction and ischemia                          |                                            |
|                                | a. Transient ischemic attacks aggravate              | 4 (4, 5)                                   |
|                                | b. Occlusive vasculopathies (Moya-Moya, sickle cell) | 4 (4, 5)                                   |
|                                | c. Spinal cord infarction                            | 4 (2, 4)                                   |
|                                | 1.2. Vascular malformations                          |                                            |
|                                | a. AV fistulas                                       | 5 (4, 5)                                   |
|                                | b. Cavernous angiomas                                | 4 (4,5)                                    |
|                                | c. Venous angiomas                                   | 4 (4, 5)                                   |
|                                | 1.3 Dural sinus thrombosis                           | 5 (4, 5)                                   |
|                                | 1.4 Cerebral amyloid angiopathy                      | 5 (4, 5)                                   |
|                                | 1.5 Stroke mimics                                    | 3 (2, 4)                                   |
|                                | 1.6 Traumatic aneurysm                               | 5 (4, 5)                                   |

---

|    |                                                           |          |
|----|-----------------------------------------------------------|----------|
| 1  |                                                           |          |
| 2  |                                                           |          |
| 3  |                                                           |          |
| 4  |                                                           |          |
| 5  | 2. Neurotrauma                                            |          |
| 6  |                                                           |          |
| 7  | 2.1 Traumatic brain injury                                |          |
| 8  |                                                           |          |
| 9  | a. Skull fracture                                         | 5 (5, 5) |
| 10 |                                                           |          |
| 11 | b. Fat emboli                                             | 5 (3, 5) |
| 12 |                                                           |          |
| 13 | 3. Neuromuscular diseases                                 |          |
| 14 |                                                           |          |
| 15 | 3.1 Amyotrophic lateral sclerosis                         | 4 (3, 4) |
| 16 |                                                           |          |
| 17 | 3.2 Rhabdomyolysis and toxic myopathies                   | 5 (4, 5) |
| 18 |                                                           |          |
| 19 | 3.3 Critical illness myopathy and neuropathy              | 5 (4, 5) |
| 20 |                                                           |          |
| 21 | 3.4 Multiple sclerosis                                    | 4 (2, 4) |
| 22 |                                                           |          |
| 23 | 3.5 Mitochondrial encephalomyopathy                       | 2 (1, 4) |
| 24 |                                                           |          |
| 25 | 3.6 Hypokalemic periodic paralysis                        | 4 (2, 4) |
| 26 |                                                           |          |
| 27 | 4. Infections                                             |          |
| 28 |                                                           |          |
| 29 | 4.1 Tetanus                                               | 4 (4, 5) |
| 30 |                                                           |          |
| 31 | 4.2 Botulism                                              | 3 (3, 4) |
| 32 |                                                           |          |
| 33 | 5. Toxic-metabolic disorders                              |          |
| 34 |                                                           |          |
| 35 | 5.1 Neuroleptic malignant syndrome/malignant hyperthermia | 5 (4, 5) |
| 36 |                                                           |          |
| 37 |                                                           |          |
| 38 |                                                           |          |
| 39 |                                                           |          |
| 40 |                                                           |          |
| 41 |                                                           |          |
| 42 |                                                           |          |
| 43 |                                                           |          |
| 44 |                                                           |          |
| 45 |                                                           |          |
| 46 |                                                           |          |

---

|                                                                                                                 |          |
|-----------------------------------------------------------------------------------------------------------------|----------|
| 5.2 Serotonin syndrome                                                                                          | 2 (2, 3) |
| 5.3 Wernicke's encephalopathy                                                                                   | 3 (2, 4) |
| 6. Inflammatory and demyelinating diseases                                                                      |          |
| 6.1 Multiple sclerosis                                                                                          | 4 (3, 4) |
| 6.2 Neurosarcoidosis                                                                                            | 4 (2, 5) |
| 6.3 Acute disseminated encephalomyelitis                                                                        | 4 (3, 5) |
| 6.4 Central nervous system vasculitis                                                                           | 4 (2, 5) |
| 6.5 Chemical or sterile meningitis (i.e., posterior fossa syndrome, nonsteroidal antiinflammatory drug-induced) | 4 (2, 5) |
| 6.6 Autoimmune encephalitis                                                                                     | 4 (4, 5) |
| 7. Encephalopathies                                                                                             |          |
| 7.1 Eclampsia, including hemolysis, elevated liver enzymes, low platelet count syndrome                         | 5 (5, 5) |
| 7.2 Uremic encephalopathy                                                                                       | 5 (4, 5) |
| 7.3 Mitochondrial encephalopathy, lactic acidosis, and stroke like (episodes) and related disorders             | 4 (2, 5) |
| 7.4 Creutzfeldt-jakob encephalopathy                                                                            | 3 (2, 4) |
| 8. Neuroendocrine disorders                                                                                     |          |
| 8.1 Panhypopituitarism                                                                                          | 4 (4, 5) |

---

|    |                                                          |          |
|----|----------------------------------------------------------|----------|
| 1  |                                                          |          |
| 2  |                                                          |          |
| 3  |                                                          |          |
| 4  |                                                          |          |
| 5  | 8.2 Multinle endocrine neoplasia                         | 3 (2, 4) |
| 6  |                                                          |          |
| 7  | 9. Movement disorders                                    |          |
| 8  |                                                          |          |
| 9  | 9.1 Hemiballismus                                        | 2 (1, 4) |
| 10 |                                                          |          |
| 11 | 9.2 Acute dystonic reactions                             | 3 (1, 4) |
| 12 |                                                          |          |
| 13 | 9.3 Amyotrophic lateral sclerosis                        | 4 (2, 4) |
| 14 |                                                          |          |
| 15 |                                                          |          |
| 16 | 10. Clinical Syndromes                                   |          |
| 17 |                                                          |          |
| 18 | 10.1 Vegetative state                                    | 5 (5, 5) |
| 19 |                                                          |          |
| 20 | 10.2 Abulia                                              | 5 (5, 5) |
| 21 |                                                          |          |
| 22 | 10.3 Dysautonomia (central fever, hyperventilation, etc) | 5 (5, 5) |
| 23 |                                                          |          |
| 24 | 10.4 Psychiatric emergencies                             | 5 (4, 5) |
| 25 |                                                          |          |
| 26 | 10.5 Locked-in syndrome                                  | 4 (3, 5) |
| 27 |                                                          |          |
| 28 | 10.6 Cord compression                                    | 5 (4, 5) |
| 29 |                                                          |          |
| 30 | 10.7 Brain death                                         | 5 (4, 5) |
| 31 |                                                          |          |
| 32 |                                                          |          |
| 33 | 11. Perioperative neurosurgical care                     |          |
| 34 |                                                          |          |
| 35 | 11.1 Intracranial pneumatosis                            | 5 (4, 5) |
| 36 |                                                          |          |
| 37 | 11.2 Postcraniotomy CSF hypovolemia                      | 5 (5, 5) |
| 38 |                                                          |          |
| 39 |                                                          |          |
| 40 |                                                          |          |
| 41 |                                                          |          |
| 42 |                                                          |          |
| 43 |                                                          |          |
| 44 |                                                          |          |
| 45 |                                                          |          |
| 46 |                                                          |          |

1  
2  
3  
4  
5  
6  
7  
8  
9  
10  
11  
12  
13  
14  
15  
16  
17  
18  
19  
20  
21  
22  
23  
24  
25  
26  
27  
28  
29  
30  
31  
32  
33  
34  
35  
36  
37  
38  
39  
40  
41  
42  
43  
44  
45  
46

---

11.3 Postcarotid endarterectomy/stenting hyperperfusion syndrome 5 (4, 5)

12. Neuro-Oncology

12.1 Brain tumors and metastases 5 (5, 5)

12.2 Spinal cord tumors and metastases 4 (4, 5)

12.3 Carcinomatous meningitis 3 (2, 4)

12.4 Paraneoplastic syndromes 4 (2, 4)

13. Pharmacotherapeutics 5 (4, 5)

B. General medical disease states

1. Cardiovascular

1.1 Acute aortic and peripheral vascular disorders (i.e., dissection, pseudoaneurysm) 5 (4, 5)

1.2 Rupture of aneurysm (bleeding and cardiac tamponade) 5 (4, 5)

1.3 Acute myocarditis 4 (2, 5)

1.4 Cardiac-cerebralsyndrome 4 (4, 5)

1.5 Right heart failure 5 (4, 5)

2. Respiratory

2.1 Pulmonary hemorrhage and massive hemoptysis 5 (5, 5)

1  
2  
3  
4  
5  
6  
7  
8  
9  
10  
11  
12  
13  
14  
15  
16  
17  
18  
19  
20  
21  
22  
23  
24  
25  
26  
27  
28  
29  
30  
31  
32  
33  
34  
35  
36  
37  
38  
39  
40  
41  
42  
43  
44  
45  
46

---

|                                                                                     |          |
|-------------------------------------------------------------------------------------|----------|
| 2.2 Sleep apnea                                                                     | 4 (2, 5) |
| 2.3 Obesity-hypoventilation syndrome                                                | 4 (2, 4) |
| 2.4 Smoke inhalation, airway burns                                                  | 4 (2, 5) |
| 3. Renal                                                                            |          |
| 3.1 Critically ill patients with chronic renal failure                              | 4 (4, 5) |
| 3.2 Continuous renal replacement therapy                                            | 5 (3, 5) |
| 4. Metabolic and endocrine effects of critical illness                              |          |
| 4.1 Thyroid storm                                                                   | 5 (4, 5) |
| 4.2 Adrenal crisis                                                                  | 5 (4, 5) |
| 4.3 Pheochromocytoma                                                                | 4 (4, 5) |
| 4.4 Disorders of calcium and magnesium balance                                      | 5 (3, 5) |
| 4.5 Hypothyroidism                                                                  | 4 (4, 5) |
| 4.6 Low serum T3 syndrome                                                           | 3 (2, 5) |
| 5. Infectious disease                                                               |          |
| 5.1 Severe community acquired infection (e.g., severe community-acquired pneumonia) | 4 (4, 5) |
| 5.2 HIV/AIDS                                                                        | 4 (3, 5) |

---

|                                                                                |          |
|--------------------------------------------------------------------------------|----------|
| 5.3 Atypical pathogens and viral infections                                    | 4 (4, 5) |
| 5.4 Fever in critically ill patient                                            | 5 (4, 5) |
| 6. Acute hematologic disorders                                                 |          |
| 6.1 Acute hemolytic disorders including thrombotic microangiopathies           | 5 (4, 5) |
| 7. Acute GI and genitourinary disorders                                        |          |
| 7.1 Acute and fulminant hepatic failure (including drug dosing)                | 5 (4, 5) |
| 7.2 Ileus and toxic megacolon                                                  | 4 (3, 5) |
| 7.3 Acute perforations of the gastrointestinal tract                           | 4 (4, 5) |
| 7.4 Acute vascular disorders of the intestine, including mesenteric infarction | 4 (3, 5) |
| 7.5 Acute intestinal obstruction, volvulus                                     | 4 (3, 5) |
| 7.6 Pancreatitis                                                               | 4 (4, 5) |
| 7.7 Urinary tract bleeding                                                     | 4 (3, 5) |
| 7.8 Obstructive uropathy, acute urinary retention                              | 4 (3, 5) |
| 7.9 Intra-abdominal infection and gastrointestinal leakage                     | 5 (4, 5) |
| 8. Immunology and transplantation                                              |          |
| 8.1 Immunosuppression, especially the neurotoxicity of these agents            | 3 (2, 5) |



1  
2  
3  
4  
5  
6  
7  
8  
9  
10  
11  
12  
13  
14  
15  
16  
17  
18  
19  
20  
21  
22  
23  
24  
25  
26  
27  
28  
29  
30  
31  
32  
33  
34  
35  
36  
37  
38  
39  
40  
41  
42  
43  
44  
45  
46

---

9.Others

9.1 Acute illness in pregnancy 5 (4, 5)

9.2 Acute illness in pediatric 4 (3, 5)

9.3 Initial approach to the manages multisystem trauma 5 (4, 5)

9.4.ICU sleep disorders 5 (4, 5)

C. Critical care monitoring practical procedures

1. General critical care practical procedures and therapeutic interventions

1.1 Peripheral venous line placement 5 (4, 5)

1.2 Nasogastric tube placement 4 (3, 5)

1.3 Urinary catheterization 4 (3, 5)

1.4 Administration of nitric oxide or prostacyclin 3 (2, 4)

1.5 Fiberoptic laryngoscopy 4 (4, 5)

1.6 Echocardiography 4 (4, 5)

1.7 Pulmonary ultrasonography 4 (4, 5)

1.8 Percutaneous gastrostomy 2 (1, 4)

1.9 Extracorporeal membrane oxygenation and other circulatory support systems 3 (2, 5)

---

|      |                                                                                                                                                      |          |
|------|------------------------------------------------------------------------------------------------------------------------------------------------------|----------|
| 1.10 | Enteral nutrition nasogastric tube placement                                                                                                         | 5 (4, 5) |
| 1.11 | Pericardiocentesis                                                                                                                                   | 4 (3, 5) |
| 1.12 | Sengstaken tube (or equivalent) placement                                                                                                            | 3 (3, 5) |
| 1.13 | Indications for gastroscopy                                                                                                                          | 4 (4, 5) |
| 2.   | Neurocritical care practical procedures and therapeutic interventions                                                                                |          |
| 2.1  | Interpretation of continuous electroencephalogram monitoring                                                                                         | 5 (4, 5) |
| 2.2  | Jugular venous bulb catheterization                                                                                                                  | 4 (3, 5) |
| 2.3  | Plasmapheresis and intravenous immunoglobulin                                                                                                        | 4 (4, 5) |
| 2.4  | Administration of intravenous and intraventricular thrombolysis                                                                                      | 4 (3, 5) |
| 2.5  | Intrathecal administration of chemotherapy, and radiographic agents                                                                                  | 5 (4, 5) |
| 2.6  | Nervous system ultrasound                                                                                                                            | 4 (3, 5) |
| 2.7  | Interpretation of single photon emission-CT and positron emission tomography                                                                         | 3 (2, 3) |
| 2.8  | Positron emission tomography                                                                                                                         | 3 (2, 3) |
| 2.9  | Endovascular neurosurgical training (e.g., Guglielmi detachable coil placement, arterial stenting, cerebral angioplasty, intraarterial thrombolysis) | 3 (2, 4) |

D. Professionalism and system management

1  
2  
3  
4  
5  
6  
7  
8  
9  
10  
11  
12  
13  
14  
15  
16  
17  
18  
19  
20  
21  
22  
23  
24  
25  
26  
27  
28  
29  
30  
31  
32  
33  
34  
35  
36  
37  
38  
39  
40  
41  
42  
43  
44  
45  
46

---

|                                                                                                    |          |
|----------------------------------------------------------------------------------------------------|----------|
| 1. Describes and explains the managerial and administrative responsibilities of the ICM specialist | 5 (4, 5) |
| 2. Medical economics: health care reimbursement, budget development                                | 4 (4, 5) |
| F. Principles of research and certification                                                        |          |
| 1. Study design                                                                                    | 4 (4, 5) |
| 2. Biostatistics                                                                                   | 4 (4, 5) |
| 3. Grant funding and protocol writing                                                              | 4 (4, 4) |
| 4. Manuscript preparation                                                                          | 4 (4, 5) |
| 5. Institutional review boards and health insurance portability and accountability act             | 4 (3, 5) |
| G. Scoring systems                                                                                 |          |
| 1. General status scoring:                                                                         |          |
| 1.1 Therapeutic Intervention Scoring System                                                        | 4 (4, 4) |
| 1.2 Multiple organ dysfunction score                                                               | 4 (3, 5) |
| 2. Organs scoring:                                                                                 |          |
| 2.1 Killip class                                                                                   | 4 (4, 5) |
| 2.2 NYHA class                                                                                     | 5 (4, 5) |
| 2.3 Acute lung injury scoring                                                                      | 4 (4, 5) |

|    |                                                        |          |
|----|--------------------------------------------------------|----------|
| 1  |                                                        |          |
| 2  |                                                        |          |
| 3  |                                                        |          |
| 4  |                                                        |          |
| 5  | 2.4 The Child-Pugh score                               | 4 (4, 4) |
| 6  |                                                        |          |
| 7  | 2.5 Acute kidney injury scoring (AKIN, RIFLE)          | 4 (3, 5) |
| 8  |                                                        |          |
| 9  | 2.6 Acute pancreatitis scoring                         | 4 (4, 5) |
| 10 |                                                        |          |
| 11 | 3. Sedation, pain and delirium scoring:                |          |
| 12 |                                                        |          |
| 13 | 3.1.Ramsay sedation score                              | 4 (2, 5) |
| 14 |                                                        |          |
| 15 | 3.2 CHADS-2 risk scores in chronic atrial fibrillation | 4 (3, 5) |
| 16 |                                                        |          |
| 17 |                                                        |          |
| 18 | 4. Trauma scoring                                      |          |
| 19 |                                                        |          |
| 20 | 4.1 Injury severity score                              | 4 (4, 5) |
| 21 |                                                        |          |
| 22 | 4.2 Abbreviated injury scale                           | 4 (4, 5) |
| 23 |                                                        |          |
| 24 |                                                        |          |
| 25 |                                                        |          |
| 26 |                                                        |          |
| 27 |                                                        |          |
| 28 |                                                        |          |
| 29 |                                                        |          |
| 30 |                                                        |          |
| 31 |                                                        |          |
| 32 |                                                        |          |
| 33 |                                                        |          |
| 34 |                                                        |          |
| 35 |                                                        |          |
| 36 |                                                        |          |
| 37 |                                                        |          |
| 38 |                                                        |          |
| 39 |                                                        |          |
| 40 |                                                        |          |
| 41 |                                                        |          |
| 42 |                                                        |          |
| 43 |                                                        |          |
| 44 |                                                        |          |
| 45 |                                                        |          |
| 46 |                                                        |          |

1  
2  
3  
4  
5 **Core competencies in neurocritical care training in China: consensus developed by a national Delphi consensus survey combined with**  
6  
7 **nominal group technique**  
8

9 Zhen Cui, MD, Liang Gao, MD, Qi-Bing Huang, MD, Li-Hong Li, MD, Bing-Hui Qiu, MD, Guang-Zhi Shi, MD, PhD, Xiang-You Yu, MD, Yan Wang, BS, Li Zhang, RN, Yu-Mei Wang, MD, Linlin Zhang, MD,  
10 PhD, Jian-Xin Zhou, MD, PhD, on behalf of the Working Group from Neuro-Critical Care Committee affiliated to the Chinese Association of Critical Care Physicians and the National Center for Healthcare Quality  
11 Management in Neurological Diseases.  
12  
13

14  
15 **Online Supplementary Appendix 2**  
16  
17

18  
19 **Appendix**  
20  
21

22 **Final set of core competencies required for neurocritical care specialist training**  
23  
24

25 **A. Neurological disease states**  
26

27 **1. Cerebrovascular diseases**  
28

29 1.1. By the end of neurocritical care training, the trainee should be able to manage infarction and ischemia independently  
30

31 1.1.1. Massive hemispheric infarction  
32

33 1.1.1. Basilar artery occlusion and stenosis  
34

35 1.1.1. Carotid artery occlusion and stenosis  
36

37 1.1.1. Delayed cerebral ischemia  
38  
39  
40  
41  
42

1  
2  
3  
4  
5 1.2. By the end of neurocritical care training, the trainee should be able to manage intracerebral hemorrhage independently

6 1.2.1. Supratentorial

7  
8 1.2.2. Cerebellar

9  
10 1.2.3. Brainstem

11  
12 1.2.4. Intraventricular

13  
14 1.2.5 Subarachnoid hemorrhage - aneurysmal and others

15  
16 1.3. By the end of neurocritical care training, the trainee should be able to manage arteriovenous malformations independently

17  
18 1.4. By the end of neurocritical care training, the trainee should be able to manage carotid-cavernous fistulae independently

19  
20 1.5. By the end of neurocritical care training, the trainee should be able to manage cervical and cerebral arterial dissections under supervision

21  
22 **2. Neurotrauma**

23  
24 2.1. By the end of neurocritical care training, the trainee should be able to manage traumatic brain injury independently

25 2.1.1. Axonal shearing injury

26 2.1.2. Epidural hematoma

27 2.1.3. Subdural hematoma

28 2.1.4. Contusions and lacerations

29 2.1.5. Penetrating craniocerebral injuries

30 2.1.6. Traumatic SAH

31  
32 2.2 By the end of neurocritical care training, the trainee should be able to manage spinal cord injury independently

### 3. Status epilepticus

3.1. By the end of neurocritical care training, the trainee should be able to manage convulsive status epilepticus independently

3.2. By the end of neurocritical care training, the trainee should be able to manage nonconvulsive status epilepticus independently

3.3. By the end of neurocritical care training, the trainee should be able to manage myoclonic epilepsy independently

### 4. Neuromuscular diseases

4.1. By the end of neurocritical care training, the trainee should be able to manage myasthenia gravis independently

4.2. By the end of neurocritical care training, the trainee should be able to manage Guillain-Barré syndrome independently

### 5. Infections

5.1. By the end of neurocritical care training, the trainee should be able to manage encephalitis (viral, bacterial, parasitic) independently

5.2. By the end of neurocritical care training, the trainee should be able to manage meningitis (viral, bacterial, parasitic) independently

5.3. By the end of neurocritical care training, the trainee should be able to manage brain and spinal epidural abscess under supervision

### 6. Toxic-metabolic disorders

6.1. By the end of neurocritical care training, the trainee should be able to manage drug overdose and withdrawal independently

6.2. By the end of neurocritical care training, the trainee should be able to manage temperature-related injuries independently

6.3. By the end of neurocritical care training, the trainee should be able to manage carbon monoxide poisoning and delayed encephalopathy independently

### 7. Inflammatory and demyelinating diseases

7.1. By the end of neurocritical care training, the trainee should be able to manage central pontine myelinolysis independently

7.2. By the end of neurocritical care training, the trainee should be able to manage osmotic demyelination syndrome independently

## 8. Encephalopathies

8.1. By the end of neurocritical care training, the trainee should be able to manage hepatic encephalopathy independently

8.2. By the end of neurocritical care training, the trainee should be able to manage hypoxic-ischemic encephalopathy independently

8.3. By the end of neurocritical care training, the trainee should be able to manage metabolic encephalopathy independently

8.4. By the end of neurocritical care training, the trainee should be able to manage hypertensive encephalopathy and posterior reversible encephalopathy syndrome (PRES) independently

## 9. Neuroendocrine disorders

9.1. By the end of neurocritical care training, the trainee should be able to manage pituitary apoplexy independently

9.2. By the end of neurocritical care training, the trainee should be able to manage diabetes insipidus independently

## 10. Movement disorders

10.1. By the end of neurocritical care training, the trainee should be able to manage movement disorders (severe dystonia and opisthotonos) independently

## 11. Clinical syndromes

11.1. By the end of neurocritical care training, the trainee should be able to teach or supervise others to manages coma

11.2. By the end of neurocritical care training, the trainee should be able to manage herniation syndromes independentl

11.3. By the end of neurocritical care training, the trainee should be able to manage elevated intracranial pressure independently

11.4. By the end of neurocritical care training, the trainee should be able to manage intracranial hypotension/ hypovolemia independently

11.5. By the end of neurocritical care training, the trainee should be able to manage hydrocephalus independently

11.6. By the end of neurocritical care training, the trainee should be able to manage delirium independently



## 12. Perioperative neurosurgical care

12.1. By the end of neurocritical care training, the trainee should be able to manage postcraniotomy hypertension independently

12.2. By the end of neurocritical care training, the trainee should be able to manage postcraniotomy pain independently

12.3. By the end of neurocritical care training, the trainee should be able to manage wound cerebrospinal fluid (CSF) leaks independently

12.4. By the end of neurocritical care training, the trainee should be able to manage wound infections independently

12.5. By the end of neurocritical care training, the trainee should be able to manage postoperative brain edema independently

12.6. By the end of neurocritical care training, the trainee should be able to manage postcraniotomy intracranial hemorrhage independently

12.7. By the end of neurocritical care training, the trainee should be able to assess and manage postcervical spine surgery airway independently

12.8. By the end of neurocritical care training, the trainee should be able to assess and manage high-risk postoperative neurosurgical patient independently

13. By the end of neurocritical care training, the trainee should be able to conduct neurorehabilitation independently

## B. General medical disease states

### 1. Cardiovascular

1.1. By the end of neurocritical care training, the trainee should be able to recognize and manage different types of shock independently

1.2. By the end of neurocritical care training, the trainee should be able to recognize and manage myocardial infarction and unstable coronary syndromes independently

1.3. By the end of neurocritical care training, the trainee should be able to recognize and manage neurogenic cardiac disturbances (electrocardiographic changes, stunned myocardium) independently

1.4. By the end of neurocritical care training, the trainee should be able to assess and manage life-threatening arrhythmia independently

1.5. By the end of neurocritical care training, the trainee should be able to recognize and manage left ventricular failure and/or acute pulmonary edema independently

1  
2  
3  
4  
5 1.6. By the end of neurocritical care training, the trainee should be able to recognize and manage neurogenic pulmonary edema independently

6  
7 1.7. By the end of neurocritical care training, the trainee should be able to manage hypertension crisis independently

8  
9 1.8. By the end of neurocritical care training, the trainee should be able to perform and interpret cardiac output and hemodynamic monitor independently

10  
11 1.9. By the end of neurocritical care training, the trainee should be able to perform electrocardiography and interpret the results independently

## 12 **2. Respiratory**

13  
14 2.1. By the end of neurocritical care training, the trainee should be able to assess and manage acute and chronic respiratory failure (type I and type II) independently

15  
16 2.2. By the end of neurocritical care training, the trainee should be able to manage chronic obstructive pulmonary disease (COPD) and status asthmaticus under supervision

17  
18 2.3. By the end of neurocritical care training, the trainee should be able to recognize (diagnosis and grading) and manage acute respiratory distress syndrome (ARDS)  
19  
20 independently

21  
22 2.4. By the end of neurocritical care training, the trainee should be able to manage aspiration independently

23  
24 2.5. By the end of neurocritical care training, the trainee should be able to recognize and manage upper airway obstruction independently

25  
26 2.6. By the end of neurocritical care training, the trainee should be able to recognize and manage bronchopulmonary infections independently

27  
28 2.7. By the end of neurocritical care training, the trainee should be able to recognize and manage pleural diseases (empyema, effusion, pneumothorax) independently

29  
30 2.8. By the end of neurocritical care training, the trainee should be able to recognize and manage neurogenic breathing patterns (central hyperventilation, Cheyne-Stokes  
31 respirations, et cetera) independently

32  
33 2.9. By the end of neurocritical care training, the trainee should be able to assess and manage thromboembolic disease (including pulmonary embolism) under supervision  
34  
35 independently

36  
37 2.10. By the end of neurocritical care training, the trainee should be able to interpret chest radiographs independently  
38  
39  
40  
41  
42

- 1  
2  
3  
4  
5 2.11. By the end of neurocritical care training, the trainee should be able to interpret chest CT image independently  
6  
7 2.12. By the end of neurocritical care training, the trainee should be able to perform and interpret end tidal CO<sub>2</sub> monitoring independently  
8  
9 2.13. By the end of neurocritical care training, the trainee should be able to perform and interpret arterial blood gas analysis independently  
10  
11 2.14. By the end of neurocritical care training, the trainee should be able to manage noninvasive and invasive mechanical ventilation independently (indication, rational,  
12 complication, and weaning)  
13

### 14 **3. Renal**

- 15  
16 3.1. By the end of neurocritical care training, the trainee should be able to assess and manage fluid, electrolytes disorders independently  
17  
18 3.2. By the end of neurocritical care training, the trainee should be able to recognize (diagnosis and grading) and manage acute kidney injury independently  
19  
20 3.3. By the end of neurocritical care training, the trainee should be able to recognize and manage derangements secondary to alterations in osmolality and electrolytes  
21 independently  
22  
23 3.4. By the end of neurocritical care training, the trainee should be able to manage acid-base disorders independently  
24  
25 3.5. By the end of neurocritical care training, the trainee should be able to manage oliguria and polyuria independently  
26  
27 3.6. By the end of neurocritical care training, the trainee should be able to manage rhabdomyolysis under supervision  
28  
29 3.7. By the end of neurocritical care training, the trainee should be able to conduct drug dose adjustment in renal failure independently  
30  
31 3.8. By the end of neurocritical care training, the trainee should be able to manage cerebral salt wasting independently  
32  
33 3.9. By the end of neurocritical care training, the trainee should be able to manage syndrome of inappropriate antidiuretic hormone (SAIDH) independently  
34

### 35 **4. Metabolic and endocrine effects of critical illness**

36  
37  
38  
39  
40  
41  
42  
43  
44  
45  
46

1  
2  
3  
4  
5 4.1. By the end of neurocritical care training, the trainee should be able to manage diabetes mellitus (ketotic and hyperglycemic hyperosmolar coma, hypoglycemia)  
6 independently  
7

8 4.2. By the end of neurocritical care training, the trainee should be able to manage systemic inflammatory response syndrome (SIRS) independently  
9

10 4.3. By the end of neurocritical care training, the trainee should be able to perform enteral/ parenteral nutritional support independently  
11

12 4.4. By the end of neurocritical care training, the trainee should be able to manage pituitary crisis under supervision  
13

#### 14 **5. Infectious Disease** 15

16 5.1. By the end of neurocritical care training, the trainee should be able to comply with infection control measures independently  
17

18 5.2. By the end of neurocritical care training, the trainee should be able to perform antimicrobial agent selection and determine dose in critically ill patients independently  
19

20 5.3. By the end of neurocritical care training, the trainee should be able to manage hospital acquired and opportunistic infections in the critically ill patient independently  
21

22 5.4. By the end of neurocritical care training, the trainee should be able to assess and manage fever in critically ill patient independently  
23

24 5.5. By the end of neurocritical care training, the trainee should be able to conduct interpretation of antibiotic concentrations and sensitivities independently  
25

26 5.6. By the end of neurocritical care training, the trainee should be able to recognize and manage sepsis, severe sepsis, and septic shock independently  
27

28 5.7. By the end of neurocritical care training, the trainee should be able to recognize and manage multi-drug resistance bacteria infection independently  
29

30 5.8. By the end of neurocritical care training, the trainee should be able to perform antimicrobial agent selection in neurological infections independently  
31

#### 32 **6. Acute hematologic disorders** 33

34 6.1. By the end of neurocritical care training, the trainee should be able to manage disseminated intravascular coagulation under supervision  
35

36 6.2. By the end of neurocritical care training, the trainee should be able to conduct anticoagulation and fibrinolytic therapy independently  
37

38 6.3. By the end of neurocritical care training, the trainee should be able to conduct blood component therapy independently  
39  
40  
41  
42  
43  
44  
45  
46

1  
2  
3  
4  
5 6.4. By the end of neurocritical care training, the trainee should be able to conduct hemostatic therapy independently

6  
7 6.5. By the end of neurocritical care training, the trainee should be able to recognize and manage hypercoagulable states under supervision

8  
9 6.6. By the end of neurocritical care training, the trainee should be able to recognize and manage traumatic coagulopathy independently

10  
11 **7. Acute gastrointestinal and genitourinary disorders**

12 7.1. By the end of neurocritical care training, the trainee should be able to assess and manage gastrointestinal bleeding independently

13  
14 7.2. By the end of neurocritical care training, the trainee should be able to prescribe stress ulcer prophylaxis independently

15  
16 7.3. By the end of neurocritical care training, the trainee should be able to assess and manage abdominal compartment syndrome independently

17  
18 **8. Immunology and transplantation**

19  
20 8.1. By the end of neurocritical care training, the trainee should be able to interpret principles of transplantation (brain death, organ donation, procurement, maintenance of  
21 organ donors, implantation) under supervision

22  
23 **9. General trauma and burns**

24  
25 9.1. By the end of neurocritical care training, the trainee should be able to assess and provide initial management of the trauma patient independently

26  
27 9.2. By the end of neurocritical care training, the trainee should be able to manage spine and pelvis trauma independently

28  
29 9.3. By the end of neurocritical care training, the trainee should be able to manage chest and abdominal trauma independently

30  
31 9.4. By the end of neurocritical care training, the trainee should be able to manage crush syndrome independently

32  
33 9.5. By the end of neurocritical care training, the trainee should be able to describe burns and electrical injury independently

34  
35 **10. Transport**

36  
37 10.1 By the end of neurocritical care training, the trainee should be able to teach or supervises patient assessment before transport

1  
2  
3  
4  
5 10.2. By the end of neurocritical care training, the trainee should be able to prepare equipment for transport independently

6  
7 10.3. By the end of neurocritical care training, the trainee should be able to perform intrahospital transport independently

8  
9 **11. Others**

10 11.1. By the end of neurocritical care training, the trainee should be able to assess and manage multiorgan dysfunction syndrome independently

11  
12 11.2. By the end of neurocritical care training, the trainee should be able to manage ICU acquired weakness under supervision

13  
14 **C. Critical care monitoring practical procedures**

15  
16 **1. Monitoring**

17  
18 1.1. By the end of neurocritical care training, the trainee should be able to perform neuromonitoring independently

19  
20 1.2. By the end of neurocritical care training, the trainee should be able to interpret principles of ECG monitoring independently

21  
22 1.3. By the end of neurocritical care training, the trainee should be able to perform and interpret invasive hemodynamic monitor independently

23  
24 1.4. By the end of neurocritical care training, the trainee should be able to perform and interpret noninvasive hemodynamic monitor independently

25  
26 1.5. By the end of neurocritical care training, the trainee should be able to perform and interpret respiratory mechanics monitor under supervision

27  
28 1.6. By the end of neurocritical care training, the trainee should be able to perform and interpret metabolic monitoring under supervision (oxygen consumption, carbon  
29  
30 dioxide production, respiratory quotient)

31  
32 1.7. By the end of neurocritical care training, the trainee should be able to conduct multimodality monitoring in NICU independently

33  
34 **2. General critical care practical procedures and therapeutic interventions**

35  
36 2.1. By the end of neurocritical care training, the trainee should be able to perform arterial catheterisation independently

37  
38 2.2. By the end of neurocritical care training, the trainee should be able to teach or supervise others central venous catheter insertion

- 1  
2  
3  
4  
5 2.3. By the end of neurocritical care training, the trainee should be able to conduct vasoactive/inotropic medication therapy independently  
6  
7 2.4. By the end of neurocritical care training, the trainee should be able to teach or supervise others to perform cardiopulmonary resuscitation, postresuscitation brain  
8 protection, to provide advanced life support for postresuscitation patient  
9  
10 2.5. By the end of neurocritical care training, the trainee should be able to teach or supervise others to perform cardioversion and defibrillation  
11  
12 2.6. By the end of neurocritical care training, the trainee should be able to perform airway maintenance and ventilation in nonintubated/unconscious patients independently  
13  
14 2.7. By the end of neurocritical care training, the trainee should be able to perform tracheal intubation independently  
15  
16 2.8. By the end of neurocritical care training, the trainee should be able to perform difficult and failed airway management independently  
17  
18 2.9. By the end of neurocritical care training, the trainee should be able to perform and interpret intra-abdominal pressure monitor independently  
19  
20 2.10. By the end of neurocritical care training, the trainee should be able to teach or supervise others to perform tracheal aspiration  
21  
22 2.11. By the end of neurocritical care training, the trainee should be able to teach or supervise others to perform oxygen therapy  
23  
24 2.12. By the end of neurocritical care training, the trainee should be able to perform fiberoptic bronchoscopy and bronchoalveolar lavage in the intubated patient under  
25 supervision  
26  
27 2.13. By the end of neurocritical care training, the trainee should be able to explain and perform recruitment maneuver: principle and practice under supervision  
28  
29 2.14. By the end of neurocritical care training, the trainee should be able to perform thoracentesis via a chest drain independently  
30  
31 2.15. By the end of neurocritical care training, the trainee should be able to perform percutaneous tracheostomy independently  
32  
33 2.16. By the end of neurocritical care training, the trainee should be able to perform bedside ultrasound to localize pleural effusion and ascites under supervision  
34  
35 2.17. By the end of neurocritical care training, the trainee should be able to assess inferior caval vein by ultrasound under supervision  
36  
37 2.18. By the end of neurocritical care training, the trainee should be able to perform ultrasound techniques for vascular localisation independently  
38  
39  
40  
41  
42  
43  
44  
45  
46

1  
2  
3  
4  
5 2.19. By the end of neurocritical care training, the trainee should be able to perform thyrocricoentesis under supervision  
6

7 **3. Neurocritical care practical procedures and therapeutic interventions**

8 3.1. By the end of neurocritical care training, the trainee should be able to perform lumbar puncture independently  
9

10 3.2. By the end of neurocritical care training, the trainee should be able to perform shunt and ventricular drain tap for CSF sampling independently  
11

12 3.3. By the end of neurocritical care training, the trainee should be able to manage external ventricular drains independently  
13

14 3.4. By the end of neurocritical care training, the trainee should be able to assess and manage pain of neurocritical care patients independently  
15

16 3.5. By the end of neurocritical care training, the trainee should be able to assess sedation and describe principle it independently  
17

18 3.6. By the end of neurocritical care training, the trainee should be able to interpret and manage of ICP and cerebral perfusion pressure data independently  
19

20 3.7. By the end of neurocritical care training, the trainee should be able to interpret saturation and jugular venous oxygenation and brain tissue oxygen data under  
21 supervision  
22

23 3.8. By the end of neurocritical care training, the trainee should be able to perform systemic moderate hypothermia under supervision  
24

25 3.9. By the end of neurocritical care training, the trainee should be able to manage fluid and conduct osmotic dehydration treatment independently  
26

27 3.10. By the end of neurocritical care training, the trainee should be able to perform and interpret cerebral multimodality monitoring (pH, partial pressure of carbon dioxide  
28 [pCO<sub>2</sub>], laser Doppler, microdialysis) under supervision  
29

30 3.11. By the end of neurocritical care training, the trainee should be able to perform lumbar drain insertion independently  
31

32 3.12. By the end of neurocritical care training, the trainee should be able to manage and insert ICP monitoring independently  
33

34 3.13. By the end of neurocritical care training, the trainee should be able to manage cerebral oximetric or perfusion monitoring under supervision  
35

36 3.14. By the end of neurocritical care training, the trainee should be able to perform brain ventricle puncture under supervision  
37  
38  
39  
40  
41  
42



1  
2  
3  
4  
5 3.15. By the end of neurocritical care training, the trainee should be able to interpret CT/MRI of nervous system under supervision

6  
7 3.16. By the end of neurocritical care training, the trainee should be able to choose neuromuscular blockade and describe indication of it under supervision

8  
9 **D. Professionalism and system management**

10 1. By the end of neurocritical care training, the trainee should be able to gather accurate, essential information from all sources, including medical interviews, physical  
11 examinations, medical records and Laboratory and radiological results independently

12  
13 2. By the end of neurocritical care training, the trainee should be able to integrate clinical findings with laboratory investigations to form a differential diagnosis  
14 independently

15  
16 3. By the end of neurocritical care training, the trainee should be able to involve patients (or their surrogates if applicable) in decisions about care and treatment (including  
17 informed consent and end-of-life care) independently

18  
19 4. By the end of neurocritical care training, the trainee should be able to promote collaborative practice independently, including multidisciplinary cooperation and effective  
20 team working

21  
22 5. By the end of neurocritical care training, the trainee should be able to ensure continuity of care through effective handover of clinical information independently

23  
24 6. By the end of neurocritical care training, the trainee should be able to describe implications of chronic and comorbid disease in the acutely ill patient independently

25  
26 7. By the end of neurocritical care training, the trainee should be able to seek learning opportunities and integrate new knowledge into clinical practice independently

27  
28 8. By the end of neurocritical care training, the trainee should be able to apply knowledge to clinical problem solving, clinical decision making, and critical thinking  
29 independently.

30  
31 9. By the end of neurocritical care training, the trainee should be able to develop a clinically applicable knowledge of the basic and clinical sciences that underlie the  
32 practice of neurointensive care

1  
2  
3  
4  
5 10. By the end of neurocritical care training, the trainee should be able to provide effective and professional consultation to physicians and health care professionals of other  
6 specialty independently  
7

8 11. By the end of neurocritical care training, the trainee should be able to maintain accurate medical records and documentation independently  
9

10 12. By the end of neurocritical care training, the trainee should be able to communicate the continuing care requirements of patients at ICU discharge to health care  
11 professionals, patients and relatives under supervision  
12

13 13. By the end of neurocritical care training, the trainee should be able to manage the safe and timely discharge of patients from ICU independently  
14

15 14. By the end of neurocritical care training, the trainee should be able to identify and minimise risk of critical incidents and adverse events independently  
16

17 15. By the end of neurocritical care training, the trainee should be able to recognize and identify deficiencies in peer performance independently  
18

19 16. By the end of neurocritical care training, the trainee should be able to identify environmental hazards and promote safety for patients and staff independently  
20

21 17. By the end of neurocritical care training, the trainee should be able to communicate effectively with patients, relatives and members of the healthcare team  
22 independently  
23

24 18. By the end of neurocritical care training, the trainee should be able to respect privacy, dignity, confidentiality, and legal constraints on the use of patient data  
25

26 19. By the end of neurocritical care training, the trainee should be able to demonstrate sensitivity and responsiveness to gender, age, culture, religion, sexual preference,  
27 socioeconomic status, beliefs, behaviors and an awareness of their impact on decision making  
28

29 20. By the end of neurocritical care training, the trainee should be able to demonstrate respect, compassion, integrity, and altruism in relationships with patients, families,  
30 and colleagues  
31

### 32 **E. Ethical and legal aspects of critical care medicine** 33

34 1. By the end of neurocritical care training, the trainee should be able to evaluate death and dying, and perform brainstem death testing under supervision  
35  
36  
37  
38  
39  
40  
41  
42  
43  
44  
45  
46

1  
2  
3  
4  
5  
6  
7  
8  
9  
10  
11  
12  
13  
14  
15  
16  
17  
18  
19  
20  
21  
22  
23  
24  
25  
26  
27  
28  
29  
30  
31  
32  
33  
34  
35  
36  
37  
38  
39  
40  
41  
42  
43  
44  
45  
46

2. By the end of neurocritical care training, the trainee should be able to manage palliative care of the critically ill patient, forgo life-sustaining treatment and order not to resuscitate under supervision

3. By the end of neurocritical care training, the trainee should be able to apply and describe practice to minimize the physical and psychosocial consequences of critical illness for patients and families under supervision

4. By the end of neurocritical care training, the trainee should be able to formulate clinical decisions with respect for ethical and legal principles independently

5. By the end of neurocritical care training, the trainee should be able to adhere to principles of confidentiality, scientific/academic integrity, and informed consent independently

#### **F. Principles of research and certification**

1. By the end of neurocritical care training, the trainee should be able to perform presentation independently

2. Certification

2.1 By the end of neurocritical care training, the trainee should acquire the certification of basic life support

2.2 By the end of neurocritical care training, the trainee should acquire the certification of advanced cardiac life support

#### **G. Scoring systems**

1. General status scoring

1.1. By the end of neurocritical care training, the trainee should be able to describe and assess patient with acute physiology and chronic health evaluation II score independently

1.2. By the end of neurocritical care training, the trainee should be able to describe and assess patient with simplified acute physiology score II score independently

2. Organs scoring

- 1  
2  
3  
4  
5 2.1. By the end of neurocritical care training, the trainee should be able to describe and assess patient with acute kidney injury scoring (KDIGO) independently  
6  
7 2.2. By the end of neurocritical care training, the trainee should be able to describe and assess patient with sequential organ failure assessment score independently  
8  
9 3. Sedation, pain and delirium scoring  
10  
11 3.1. By the end of neurocritical care training, the trainee should be able to teach and supervise others to perform Critical-Care Pain Observation Tool independently  
12  
13 3.2. By the end of neurocritical care training, the trainee should be able to describe and assess patient with Richmond Agitation-Sedation Scale independently  
14  
15 3.3. By the end of neurocritical care training, the trainee should be able to describe and assess patient with the confusion assessment method for the diagnosis of delirium in  
16 the ICU independently  
17  
18 3.4. By the end of neurocritical care training, the trainee should be able to describe and assess patient with self-rating anxiety scale independently  
19  
20 4. Neural system scoring  
21  
22 4.1 By the end of neurocritical care training, the trainee should be able to teach and supervise others to perform Glasgow Coma Scale  
23  
24 4.2 By the end of neurocritical care training, the trainee should be able to describe and assess patient with National Institute of Health Stroke Scale independently  
25  
26  
27  
28  
29  
30  
31  
32  
33  
34  
35  
36  
37  
38  
39  
40  
41  
42  
43  
44  
45  
46

# BMJ Open

## Core competencies in neurocritical care training in China: consensus developed by a national Delphi consensus survey combined with nominal group technique

|                                 |                                                                                                                                                                                                                                                                                                                                                                                                                                                                                                                                                                                                                                                                                                                                                                                                                                                                                                                                                                                                                                                                                                                                                     |
|---------------------------------|-----------------------------------------------------------------------------------------------------------------------------------------------------------------------------------------------------------------------------------------------------------------------------------------------------------------------------------------------------------------------------------------------------------------------------------------------------------------------------------------------------------------------------------------------------------------------------------------------------------------------------------------------------------------------------------------------------------------------------------------------------------------------------------------------------------------------------------------------------------------------------------------------------------------------------------------------------------------------------------------------------------------------------------------------------------------------------------------------------------------------------------------------------|
| Journal:                        | <i>BMJ Open</i>                                                                                                                                                                                                                                                                                                                                                                                                                                                                                                                                                                                                                                                                                                                                                                                                                                                                                                                                                                                                                                                                                                                                     |
| Manuscript ID                   | bmjopen-2019-033441.R1                                                                                                                                                                                                                                                                                                                                                                                                                                                                                                                                                                                                                                                                                                                                                                                                                                                                                                                                                                                                                                                                                                                              |
| Article Type:                   | Original research                                                                                                                                                                                                                                                                                                                                                                                                                                                                                                                                                                                                                                                                                                                                                                                                                                                                                                                                                                                                                                                                                                                                   |
| Date Submitted by the Author:   | 13-Nov-2019                                                                                                                                                                                                                                                                                                                                                                                                                                                                                                                                                                                                                                                                                                                                                                                                                                                                                                                                                                                                                                                                                                                                         |
| Complete List of Authors:       | Cui, Zhen; Ji Shui Tan Hospital and Fourth Medical College of Peking University, Department of Critical Care Medicine<br>Gao, Liang; Shanghai Tenth People's Hospital, Department of Neurosurgery<br>Huang, Qi Bing; Shandong University Qilu Hospital, Department of Neurosurgery<br>Li, Li Hong; Tangdu Hospital Fourth Military Medical University, Department of Neurosurgery<br>Qiu, Bing Hui; Southern Medical University Nanfang Hospital, Department of Neurosurgery<br>Shi, Guang Zhi; Beijing Tiantan Hospital, Department of Critical Care Medicine<br>Yu, Xiang You; Xinjiang Medical University Affiliated First Hospital, Department of Critical Care Medicine<br>Wang, Yan; Xinjiang Medical University Affiliated First Hospital, Department of Critical Care Medicine<br>Zhang, Li ; Xinjiang Medical University Affiliated First Hospital, Department of Critical Care Medicine<br>Wang, Yumei; Beijing Tiantan Hospital, Department of Critical Care Medicine<br>Zhang, Linlin; Beijing Tiantan Hospital, Department of Critical Care Medicine<br>Zhou, Jian-Xin; Beijing Tiantan Hospital, Department of Critical Care Medicine |
| <b>Primary Subject Heading</b>: | Intensive care                                                                                                                                                                                                                                                                                                                                                                                                                                                                                                                                                                                                                                                                                                                                                                                                                                                                                                                                                                                                                                                                                                                                      |
| Secondary Subject Heading:      | Neurology                                                                                                                                                                                                                                                                                                                                                                                                                                                                                                                                                                                                                                                                                                                                                                                                                                                                                                                                                                                                                                                                                                                                           |
| Keywords:                       | neurocritical care, training, core competency, consensus, Delphi, nominal group                                                                                                                                                                                                                                                                                                                                                                                                                                                                                                                                                                                                                                                                                                                                                                                                                                                                                                                                                                                                                                                                     |
|                                 |                                                                                                                                                                                                                                                                                                                                                                                                                                                                                                                                                                                                                                                                                                                                                                                                                                                                                                                                                                                                                                                                                                                                                     |

SCHOLARONE™  
Manuscripts

1  
2  
3  
4  
5  
6  
7  
8  
9  
10  
11  
12  
13  
14  
15  
16  
17  
18  
19  
20  
21  
22  
23  
24  
25  
26  
27  
28  
29  
30  
31  
32  
33  
34  
35  
36  
37  
38  
39  
40  
41  
42  
43  
44  
45  
46  
47  
48  
49  
50  
51  
52  
53  
54  
55  
56  
57  
58  
59  
60

1  
2  
3 **Core competencies in neurocritical care training in China: consensus developed**  
4  
5 **by a national Delphi consensus survey combined with nominal group technique**  
6

7 Zhen Cui,<sup>1,2</sup> Liang Gao,<sup>3</sup> Qi-Bing Huang,<sup>4</sup> Li-Hong Li,<sup>5</sup> Bing-Hui Qiu,<sup>6</sup> Guang-Zhi Shi,<sup>1</sup> Xiang-You  
8 Yu,<sup>7</sup> Yan Wang,<sup>7</sup> Li Zhang,<sup>7</sup> Yu-Mei Wang,<sup>1</sup> Linlin Zhang,<sup>1,†</sup> Jian-Xin Zhou,<sup>1,\*†</sup> On behalf of the  
9 Working Group from Neuro-Critical Care Committee affiliated to the Chinese Association of Critical  
10 Care Physicians and the National Center for Healthcare Quality Management in Neurological Diseases.  
11  
12

13  
14  
15 <sup>1</sup> Department of Critical Care Medicine, Beijing Tiantan Hospital, Capital Medical University, Beijing,  
16 China.  
17

18  
19 <sup>2</sup> Department of Critical Care Medicine, Beijing Jishuitan Hospital, Peking University, Beijing, China.  
20

21 <sup>3</sup> Department of Neurosurgery, Shanghai Tenth people's hospital, Tongji University, Shanghai, China.  
22

23 <sup>4</sup> Department of Neurosurgery, Qilu Hospital, Shandong University, Jinan, Shandong, China.  
24

25 <sup>5</sup> Department of Neurosurgery, Tangdu Hospital, The Fourth Military Medical University, Xi'an,  
26 Shanxi, China.  
27

28 <sup>6</sup> Department of Neurosurgery, Nanfang Hospital, Southern Medical University, Guangzhou,  
29 Guangdong, China.  
30

31 <sup>7</sup> Department of Critical Care Medicine, Xinjiang Medical University 1st Hospital, Urumuqi, Xinjiang,  
32 China.  
33

34  
35  
36 \* Correspondence to

37 Jian-Xin Zhou;

38 Department of Critical Care Medicine, Beijing Tiantan Hospital, Capital Medical University, Beijing,  
39 100070, China  
40

41 Telephone: +8610 59978019  
42

43 Fax: +8610 59978019  
44

45 Email: zhoujx.cn@gmail.com  
46

47  
48  
49  
50 † Equal contribution  
51

52  
53  
54  
55  
56  
57  
58  
59  
60  
Keywords: neurocritical care, training, core competency, consensus, Delphi, nominal group

Word count: 3454

## ABSTRACT

**Objectives:** To define the core competencies essential for specialist training in neurocritical care in China.

**Design:** Modified Delphi method and nominal group technique.

**Setting:** National.

**Participants:** A total of 1094 respondents from 33 provinces in China participated in the online survey. A nominal group of 11 members was organized by the Neuro-Critical Care Committee affiliated with the Chinese Association of Critical Care Physicians and the National Center for Healthcare Quality Management in Neurological Diseases.

**Results:** 1094 respondents from 33 provinces in China participated in the online survey. A formal list containing 329 statements was generated for the rating by a nominal group. After five rounds of nominal group meetings and one round of comments and iterative review, 198 core competencies (54 on neurological diseases, 64 on general medical diseases, 42 on monitoring of practical procedures, 20 on professionalism and system management, 5 on ethical and legal aspects, 3 on the principles of research and certification, and 10 on scoring systems) formed the final list.

**Conclusion:** By using consensus techniques, we have developed a list of core competencies for neurocritical care training, which may serve as a reference for future specialist training programs in China.



1  
2  
3 **Main strengths and limitations of this study**  
4

5 1. To the best of our knowledge, this is the first time that core competencies for neurocritical care has  
6 been established in China.  
7

8  
9 2. Consensus techniques were employed in our study, which may serve as a reference for future  
10 specialist training programs in China.  
11

12  
13 3. All of the nominal group members came from tertiary academic hospitals so they might not have  
14 represented the views of lower-grade hospitals.  
15  
16  
17  
18  
19  
20  
21  
22  
23  
24  
25  
26  
27  
28  
29  
30  
31  
32  
33  
34  
35  
36  
37  
38  
39  
40  
41  
42  
43  
44  
45  
46  
47  
48  
49  
50  
51  
52  
53  
54  
55  
56  
57  
58  
59  
60

For peer review only

## INTRODUCTION

During the past three decades, neuro-intensive care units (NICUs) in China grew rapidly with the development of neuroscience and critical care medicine [1,2]. A recent survey demonstrated that most of the NICUs in China are operated under a “closed” model and that clinical practice is conducted by full-time dedicated neuro-intensivists [3]. Systemic professional training and the performance assessment of physicians involved in neurocritical care practice are among the cornerstones of the development of the NICU [4]. At present, professional training programs focusing on critical care medicine and neurosurgery have been put into practice in China [5]. However, there is no standardized national training program for neuro-intensivists.

The experience of critical care and neurocritical care training in other countries has already illustrated that identifying core competencies is important for establishing standardized training programs [6-8]. To date, no core competency lists are available for neurocritical care training in China. Recently, a list of competencies for general critical care training has been established [9]. However, since neurocritical care is a multidisciplinary subspecialty that contains the characteristics of neurology, neurosurgery and critical care medicine, it is inappropriate to directly apply critical care or neurological/neurosurgical lists for neurocritical care. The United Council for Neurologic Subspecialties (UCNS) and the American Academy of Neurology (AAN) have published their core competency lists for neurocritical care training, respectively [7,10]. Both were generated based on the opinions of experts. Additionally, due to the diversity of medical resources and educational systems in China, the establishment of NICUs is extremely imbalanced across different regions [3]. Therefore, consensus statements issued by other countries may not be applicable for NICUs in China.

The Neuro-Critical Care Committee affiliated with the Chinese Association of Critical Care Physicians (NCCC-CACCP) and the National Center for Healthcare Quality Management in Neurological Diseases called for a working group to generate a list of fundamental core competencies for neurocritical care training in China. The modified Delphi method and nominal group (NG) technique were used during consensus establishment. The methodology and results of the present study might provide a reference for future specialist training programs in different regions.

## METHODS

The study protocol was approved by the IRB of Beijing Tiantan Hospital, Capital Medical University (No. KY2017-034-02). Since no patients were involved in the study, our local IRB approved a waiver of informed consent.

The present study was conducted in three phases from February 2018 to May 2019 (**Fig. 1**). In phase 1 (the first round Delphi), a nationwide questionnaire was published online to collect opinions on the core competencies that provided a basic perspective for the specialists training in neurocritical care. In phase 2, several rounds of voting were conducted by face-to-face NG meetings to generate a core competencies list. Then the minimum level of expertise, which is equated with the ability that should be attained at the end of training, was identified by one round of voting. During phase 3 (the second round Delphi), the draft was posted online for further comments.

### **Patient and public involvement**

There was no patient or public involvement in this study.

### **Phase 1: generation and rearrangement competencies list (first round Delphi)**

A list of potential core competencies was developed based on four previous publications, including the list introduced by the Competency-Based Training in Intensive Care Medicine in Europe Collaboration (CoBaTrICE) [6], the guidelines developed by UCNS [7], the Chinese College of Intensive and Critical Care Medicine (CCICCM) [9] and the Critical Care & Emergency Medicine fellowship core curriculum of AAN [10]. In principle, all core competencies proposed by the aforementioned publications were preserved, while the duplicated items were rearranged to simplify the list. Those items with a definition of the level of expertise were modified. For example, the items about shock in CCICCM (To recognize and manage different types of shock) and UCNS (Shock: hypotension) and its complications (vasodilatory and cardiogenic) were rewritten as “different types of shock” in the potential list. Furthermore, since there were very few items in the published guidelines relevant to scoring system for patient assessment, we added five new items related to the scoring system.

The potential competencies list was translated into Chinese and organized into an online questionnaire (<https://www.wjx.cn/jq/21776519.aspx>, accessed April 2, 2018), which comprised seven parts (general medical diseases, neurological diseases, monitoring practice, professionalism and system management, ethical and legal, research and certification, and scoring system). The respondents were asked to select “YES” or “NO” for each item. Respondents were also invited to answer an open question: “Which

1  
2  
3 competencies are important for specialist training in neurocritical care, in addition to those listed  
4  
5 above”.

6  
7 The online questionnaire was disseminated via three types of media:

8  
9 (1) Members of the NCCC-CACCP from each province were responsible for the distribution of the  
10  
11 questionnaire via email, WeChat or website links.

12  
13 (2) The questionnaire was posted on the official website of the Chinese Society of Critical Care  
14  
15 Medicine (<http://www.cscem.org.cn>, accessed April 2, 2018).

16  
17 (3) The questionnaire was posted on the WeChat official account of the Department of Critical Care  
18  
19 Medicine of Capital Medical University (<https://www.wjx.cn/jq/21776519.aspx>, accessed April 2,  
20  
21 2018).

22  
23 We used WeChat as the primary disseminating means because it is the most popular social media not  
24  
25 only in China but in the entire Chinese community. WeChat integrates the functions of WhatsApp,  
26  
27 Instagram and Facebook.

28  
29 The questionnaire was posted online for 90 days. After removing duplicate and meaningless responses  
30  
31 from the “open question”, the remaining responses and all those items that received at least one “YES”  
32  
33 response were generated into a formal list for the NG meeting.

#### 34 **Phase 2: NG ratings**

35  
36 The leaders of the NCCC-CACCP and the National Center for Healthcare Quality Management in  
37  
38 Neurological Diseases were responsible for the establishment of NG. Considering the imbalance of  
39  
40 medical resources in China, 11 NG members from different regions were invited, covering areas from  
41  
42 economic development to underdevelopment (six provinces: Beijing, Shanghai, Shandong, Shanxi,  
43  
44 Guangdong, Xinjiang). There were four neuro-intensivists with neurological/neurosurgical background,  
45  
46 three general intensivists in charge of NICUs, two trainees who had completed training in neurocritical  
47  
48 care, one respiratory therapist and one experienced neurocritical care nurse. A researcher was selected  
49  
50 as the coordinator to facilitate the process. The four neuro-intensivists and three general intensivists  
51  
52 were all engaged in graduate, postgraduate medical education and in charge of physician training  
53  
54 program. The three general intensivists in the nominal group were specialist training (similar with  
55  
56 fellowship training in U.S.) directors of critical care medicine and the four neuro-intensivists were  
57  
58 residency training directors on neurology or neurosurgery.  
59  
60

1  
2  
3 To improve efficiency, the first round of NG rating was conducted by sending the formal list generated  
4 after the online survey to the NG members by mail. All of the competencies were followed by the same  
5 question: “Is it important for specialists training in neurocritical care?” Meanwhile, the percentages of  
6 “YES” responses selected during the online questionnaire were provided. The NG members were asked  
7 to individually rate the importance of competencies using a 5-point Likert scale (ranging from 1  
8 representing very unimportant to 5 representing very important) [6], and to return the feedback in one  
9 week.

10  
11 The coordinator was in charge of analyzing the feedback of the questionnaires. Items achieving full  
12 consensus (100% NG members voting 4- or 5-point) were directly entered into the final list. Other  
13 undetermined items were emailed to the NG members one week before the plenary NG ratings. Data on  
14 personal and group ratings for each item during the first round were provided as well. The NG  
15 members were requested to read these materials carefully and compare the differences between their  
16 own opinions and those of other NG members.

17  
18 A face-to-face NG meeting was held on July 21, 2018 (the second round NG rating). Each NG member  
19 was required to select at least the five most important items individually from those items entered in the  
20 second round of ratings. Each NG member was asked to explain the reasons for selecting these items in  
21 turn, and others were not allowed to interrupt during this process. Afterwards, an open discussion for  
22 debate was conducted. During the meeting, the NG members were frequently reminded to consider the  
23 resource disequilibrium of the national medical system and respect the opinions of the “vulnerable  
24 members” such as trainees, nurses and respiratory therapists. Finally, each member rated the  
25 importance of competencies independently, as in the first round. Items achieving full consensus entered  
26 into the final list; otherwise, they were entered into the third round. The third and fourth rounds were  
27 conducted in the same manner as the second round. Since no item achieved full consensus (100% NG  
28 members voting 4- or 5-point) during the fourth round, the iteration ended. All the items that did not  
29 achieve full consensus were eliminated. The resulting data from the previous rounds were presented to  
30 the NG members during the meeting.

31  
32 The fifth round NG rating was held on July 22, 2018. The NG members were required to identify the  
33 minimum level of expertise for each competence item, which was defined at four levels: a, b, c and d.  
34 We used the CoBaTrICE approach [6] to describe the level of expertise in the competence statements: a  
35 = has knowledge of or describes ... ; b = performs, manages, conducts, demonstrates, assesses or  
36  
37  
38  
39  
40  
41  
42  
43  
44  
45  
46  
47  
48  
49  
50  
51  
52  
53  
54  
55  
56  
57  
58  
59  
60

1  
2  
3 interprets ... under supervision; c = performs, manages, conducts, demonstrates, assesses, interprets ...  
4  
5 independently; d = teaches or supervises others to perform (selected from the generic descriptors,  
6  
7 online supplementary appendix 1, Table S1). A simple majority rule was implemented; that is, the level  
8  
9 that gained the most votes was accepted as the final choice. When the number of votes was the same,  
10  
11 the lower level would be accepted. For example, if five “b”, five “c” and one “d” were voted, the level  
12  
13 “b” would be accepted as the minimum level of expertise.

14 All NG members participated in all of the five rounds NG meetings.

### 15 16 **Phase 3: comments and iterative review (second round Delphi)**

17  
18 The draft of the final list was delivered by three types of media, as with the first round of Delphi. All  
19  
20 participants who provided an email address during the online survey were contacted and invited to give  
21  
22 comments.  
23

### 24 **Development of the final set**

25  
26 After the three phases of the study, the final competence set was constructed as the statements were  
27  
28 made of three parts: “context”, “level of expertise” and “content of competence” (online supplementary  
29  
30 appendix 1, Table S2).

31  
32 The number of items in the final competence set was compared to those in guidelines and statements  
33  
34 published by CoBaTrICE, UCNS, CCICCM and AAN.

### 35 **Statistical analysis**

36  
37 Categorical data were presented as number (percentage). Continuous data were presented as the median  
38  
39 and the interquartile range (IQR). All data were analyzed using SPSS version 17.0.  
40  
41  
42  
43  
44  
45  
46  
47  
48  
49  
50  
51  
52  
53  
54  
55  
56  
57  
58  
59  
60

## RESULTS

### Phase 1: generation and rearrangement competencies list (first round Delphi)

A total 1094 respondents from 33 administrative provinces (including Macao and Taiwan) participated in the first round of Delphi (**Table 1**). There were 916 (83.7%) respondents from tertiary hospitals, 536 (49.0%) of whom had been engaged in clinical practice for more than 10 years. Each item in the original online questionnaire won at least one vote, so all entered the NG rating. The open question received 394 additional suggestions, most of which had already been included in the original online questionnaire. Finally, 37 suggestions (22 relating to knowledge and skills and 15 relating to the scoring system) were included in the formal list after careful consideration. Following the rule that we not delete items but only analyze and integrate them, a formal list containing 329 statements was ultimately generated for the following NG ratings (online supplementary appendix 1, Table S3 and S4).

### Phase 2: NG ratings

During the first round of ratings, 138 (41.8%) items achieved full consensus. Then, 52 (15.8%) and eight (2.4%) items were elected during the second and third rounds, respectively. In the fourth round, no additional items achieved full consensus; therefore, the rating was terminated. Finally, a list containing 198 items was generated (online supplementary appendix 1, Table S3). Another 131 items that did not reach full consensus were eliminated (online supplementary appendix 1, Table S4).

The minimum level of expertise was identified in the fifth round of rating. Following the established rules, most items were rated as level “c” (159, 80.3%), with one “a” (0.5%), 28 “b” (14.1%) and 10 “d” (5.0%) ratings. Nineteen items had the same rating results in two levels of expertise, and the lower level was accepted as the final level. For example, the item “9.5 Describes burns and electrical injury” was voted as five “a”, five “b” and one “c”. According to the rule, the level “a” was accepted.

### Phase 3: comments and iterative review (second round of Delphi)

There were 111 replies received from 27 provinces (Table 1). No new competencies were proposed during this phase, so no change was made to the final competency list. It is worth noted that many participants expressed their urgent demand for standardized neurointensive training.

### Development of the final set

The final competence set comprised 198 competency statements divided into seven parts (**Fig. 2**, online supplementary appendix 2). Online supplementary appendix 2 also shows the overlap of our core competences with those from other international organizations.

1  
2  
3 The number of items in the final competence set (n=198) was more than the number in CoBaTrICE  
4  
5 (n=102), CCICCM (n=129) and AAN (n=66) but was less than the number in UCNS (n=289) (**Fig. 3**).  
6  
7  
8  
9  
10  
11  
12  
13  
14  
15  
16  
17  
18  
19  
20  
21  
22  
23  
24  
25  
26  
27  
28  
29  
30  
31  
32  
33  
34  
35  
36  
37  
38  
39  
40  
41  
42  
43  
44  
45  
46  
47  
48  
49  
50  
51  
52  
53  
54  
55  
56  
57  
58  
59  
60

For peer review only



## DISCUSSION

Based on past guidelines, we used consensus techniques, i.e., the modified Delphi method and NG technique, to develop a set of 198 core competencies for fundamental neurocritical care training in China. To the best of our knowledge, this is the first time that consensus techniques have been applied to the development of core competencies of neurocritical care in China. On behalf of the Working Group of the National Center of Healthcare Quality Management in Neurological System Diseases, we will implement this document of core competencies through this administration organization, and the implementation of this consensus will be one of the indicators for quality management of neurocritical care.

The Delphi method and NG technique are the most commonly employed techniques for developing consensus [11]. These methods have been used successfully in critical care medicine, for instance, to identify the core competencies of critical care in Europe [6] and China [9] and to establish national research priorities of critical care in the UK [12]. The Delphi method is used to collect opinions and evaluate rating results. This technique was initially described by the RAND Air Force Corporation in America in the 1950s [13]. In the field of medical education, more than three quarters of publications using consensus techniques adopted the Delphi and modified Delphi [14]. This methodology permits individual thinking. In phase 1 Delphi, our survey was open to respondents with different backgrounds to collect ideas and suggestions as much as possible on topics such as ethics and professionalism. The NG technique is employed to select the most important items and define the minimum level of expertise. During face-to-face ratings, the interaction is controlled by a coordinator so that all participants have opportunities to express their views and the dominance of one or two vocal members can be avoided [11]. Later, the free period allows for more expression of ideas and discussions. The design of our study shares many similarities with CoBaTriCE [6], except for one step order. In our study, we adhered the principle that determining the core competencies is the top priority. The most important items were voted on prior to the determination of the minimum level of expertise. The purpose of this adjustment was to avoid the potential influence of the minimum level of expertise on the voting process on the importance of the competencies. For example, if the item was previously categorized as level “a”, it may have been interpreted as “unimportant” and ruled out during the voting on importance.

1  
2  
3 The number of our items was significantly reduced compared to UCNS [7] (**Fig. 3**). The main reason is  
4 that we wanted to obtain a basic list with the greatest consensus. Therefore, only those competencies  
5 agreed on by all NG members were included. For example, one NG member insisted that research  
6 capacity was not essential for junior physicians. Under the established admission criteria, most items  
7 relevant to research capacity were ruled out. In addition, the differences in the professional  
8 backgrounds of the NG members lead to divergences. For example, some NG members with a  
9 neuroscience background believed that the ultrasound technique was not so important, while NG  
10 members specialized in general critical care insisted that ultrasound was an essential skill for clinical  
11 practice. This phenomenon may be associated with the popularity of ultrasound in the two specialties  
12 [15,16]. After repeated discussions, three items were admitted in the third round (pleural effusion and  
13 ascites localization, assesses inferior caval vein, and vascular localization), although more advanced  
14 techniques such as lung ultrasound and echocardiography were excluded. Compared with CCICCM  
15 [9], our list not only added a large number of neurological items but also added some items related to  
16 systemic diseases related to neuroscience to adapt to neurocritical care training. More than 30 items  
17 related to general critical care were deleted, such as “Manages continuous renal replacement therapy”.  
18 Furthermore, the 15 newly added items were all from the first round of Delphi, which highlighted the  
19 importance of the Delphi method and avoided the loss of important items. The comparison of our core  
20 competences with those from CoBaTrICE, CCICCM, AAN and UCNS (Online supplementary  
21 appendix 2) might help these international organizations to modify and enhance their core  
22 competencies.

23  
24 Neurocritical care is an interdisciplinary specialty involving neuroscience and critical care medicine  
25 [17,18]. In China, NICUs fall under different departments and are managed by neurosurgeons,  
26 neurologists or intensivists [3]. The training requirements of different regions and backgrounds are  
27 highly diverse. An all-embracing competency list could be a burden for a training program and may  
28 decrease efficiency. Our lists selected essential fundamental competencies for physicians who had just  
29 finished neurocritical care training, regardless of whether a training program was based on  
30 neurosurgery, neurology, critical care medicine or other specialties related to neurocritical care.  
31 Training program directors may reorganize this list by adding core competencies for any special local  
32 training. Those items that had been ruled out during the NG process might serve as optional  
33 competencies. For those trainees after neurological and neurosurgical training, general critical care  
34  
35  
36  
37  
38  
39  
40  
41  
42  
43  
44  
45  
46  
47  
48  
49  
50  
51  
52  
53  
54  
55  
56  
57  
58  
59  
60

1  
2  
3 training items may be added according to our core competencies list and those from CCICCM [9].  
4  
5 Although all of the items have reached consensus after the NG rating, the content and minimum level  
6  
7 of expertise on some items may be controversial. In addition, some clinically relevant conditions, such  
8  
9 as brain death, were not included in the final lists. However, we must report according to the results of  
10  
11 the vote. Readers and training program directors should be aware of potential disputes and make  
12  
13 adjustment as needed.

14  
15 There are some potential limitations in our study. First, we used WeChat as one of the media to  
16  
17 disseminate online questionnaires to maximize the efficiency and enthusiasm of the participants.  
18  
19 Therefore, it is inevitable that some feedback was of low quality and given without consideration.  
20  
21 Fortunately, among more than one thousand respondents, the proportion of low-quality responses was  
22  
23 quite low, so there was not much impact on the final results. Additionally, in both rounds of Delphi, we  
24  
25 used the WeChat to deliver our questionnaires. Although the WeChat is powerful and highly efficient,  
26  
27 we have to admit that by this way, we are unable to obtain the exact number of participants who the  
28  
29 questionnaires were sent to. Therefore, we cannot tell the 'denominator' for the number of stakeholders  
30  
31 invited to participate in either round of the Delphi. Thus, the response rate cannot be identified. Second,  
32  
33 although we had reminded the experts to pay attention to the opinions of vulnerable groups and the  
34  
35 voting processes were independent, trainees, nurses and respiratory therapists were still less involved in  
36  
37 the discussion. By analyzing the questionnaires, we could not rule out the suspicion of conformity in  
38  
39 the selection of some items. Third, all of the NG members came from tertiary academic hospitals so  
40  
41 they may not have represented the views of lower-grade hospitals. However, one-seventh of the replies  
42  
43 were received from lower-grade hospitals in Phase 1, which provided a reference for the NG meetings.  
44  
45 In addition, the NG members were reminded to consider the resource disequilibrium during the voting  
46  
47 processes. Last, patients and their relatives were not invited to participate in our study, which therefore  
48  
49 might have lacked their opinions. However, the CoBaTriCE invited patients and their relatives to give  
50  
51 their opinions, and all these items were incorporated into our potential list.  
52  
53  
54  
55  
56  
57  
58  
59  
60

## CONCLUSIONS

In summary, by using consensus techniques, we have developed a list of core competencies for Chinese neurocritical care training that may serve as a reference for future specialist training programs.

For peer review only

## REFERENCES

1. Huang M, Wang J, Ni X, *et al*. Neurocritical care in china: past, present, and future. *World Neurosurg* 2016;95:502-6.
2. Wang J, Bai L, Shi M, *et al*. Trends in age of first-ever stroke following increased incidence and life expectancy in a low-income chinese population. *Stroke* 2016;47:929-35.
3. Su YY, Wang M, Feng HH, *et al*. An overview of neurocritical care in China: a nationwide survey. *Chin Med J (Engl)* 2013;126:3422-6.
4. Dhar R, Rajajee V, Finley CA, *et al*. The state of neurocritical care fellowship training and attitudes toward accreditation and certification: a survey of neurocritical care fellowship program directors. *Front Neurol* 2017;8:548.
5. National Health Commission of the People's Republic of China: recommendation for conducting specialist training program in China. 2016 <http://www.nhc.gov.cn/qjjys/s3593/201601/0ae28a6282a34c4e93cd7bc576a51553.shtml> (accessed 29 May 2019).
6. Bion JF, Barrett H. Development of core competencies for an international training programme in intensive care medicine. *Intensive Care Med* 2006;32:1371-83.
7. Mayer SA, Coplin WM, Chang C, *et al*. Neurocritical Care Society; American Academy of Neurology Section on Critical Care and Emergency Neurology; Society of Neurosurgical Anesthesia and Critical care: core curriculum and competencies for advanced training in neurological intensive care: United Council for Neurologic Subspecialties guidelines. *Neurocrit Care* 2006;5:159-65.
8. Cohen AS, Izzy S, Kumar MA, *et al*. Education research: variation in priorities for neurocritical care education expressed across role groups. *Neurology* 2018;90:1117-22.
9. Hu X, Xi X, Ma P, *et al*. Consensus development of core competencies in intensive and critical care medicine training in China. *Crit Care* 2016;20:330.
10. American Academy of Neurology: Critical Care & Emergency Medicine Fellowship Core Curriculum. 2019 <https://www.aan.com/tools-and-resources/academic-neurologists-researchers/program-and-fellowship-director-resources/aan-core-curricula/> (accessed 29 May 2019).
11. Murphy MK, Black NA, Lamping DL, *et al*. Consensus development methods, and their use in clinical guideline development. *Health Technol Assess* 1998;2:1-88.

12. Goldfrad C, Vella K, Bion JF, *et al.* Research priorities in critical care medicine in the UK. *Intensive Care Med* 2000;26:1480-88.
13. Helmer O, Dalkey N. An experimental application of the Delphi method to the use of experts. *Manage Sci* 1963;9:458-67.
14. Humphrey-Murto S, Varpio L, Wood TJ, *et al.* The use of the Delphi and other consensus group methods in medical education research: a review. *Acad Med* 2017;92:1491-98.
15. Wong A, Galarza L, Duska F. Critical care ultrasound: a systematic review of international training competencies and program. *Crit Care Med* 2019;47:e256-62.
16. Rajajee V, Díaz-Gómez JL. Critical care ultrasound should be a priority first-line assessment tool in neurocritical care. *Crit Care Med* 2019;47:833-6.
17. Markandaya M, Thomas KP, Jahromi B, *et al.* The role of neurocritical care: a brief report on the survey results of neurosciences and critical care specialists. *Neurocrit Care* 2012;16:72-81.
18. Martin A, Chen ML, Chatterjee A, *et al.* Specialty classifications of physicians who provide neurocritical care in the United States. *Neurocrit Care* 2019;30:177-84.

1  
2  
3 **Contributors:** Linlin Z and JXZ conceived the study. Statistical design and analysis were done by ZC  
4 and YMW. ZC, Linlin Z and JXZ drafted the initial version of the manuscript. ZC, LG, QBH, LHL,  
5 BHQ, GZS, XYY, YW, Li Z, YMW, Linlin Z and JXZ participated nominal group meeting. All authors  
6 revised and approved the final version of the paper.  
7  
8

9  
10 **Funding:** This study did not receive funding.

11  
12 **Competing interests:** None declared.

13  
14 **Patient consent:** Not required.

15  
16  
17 **Data sharing statement:** Data can be accessed by contacting the corresponding author on reasonable  
18 request.  
19  
20  
21  
22  
23  
24  
25  
26  
27  
28  
29  
30  
31  
32  
33  
34  
35  
36  
37  
38  
39  
40  
41  
42  
43  
44  
45  
46  
47  
48  
49  
50  
51  
52  
53  
54  
55  
56  
57  
58  
59  
60

## FIGURE LEGENDS

**Figure 1.** The study was conducted in three phases. In phase 1, a competencies list was generated and arranged during the first round of Delphi. In phase 2, five rounds of nominal group (NG) meetings were conducted to confirm the competencies list and levels of expertise. In phase 3, comments and iterative review were recirculated during the second round of Delphi.

**Figure 2.** The numbers of competencies categorized into seven different themes. The number of competencies entering the nominal group (NG) rating that were finally accepted are shown.

**Figure 3.** The intersection among the competencies list developed in the present study (n=198, blue circle) with other guidelines and statements, including the Competency Based Training in Intensive Care Medicine in Europe Collaboration (CoBaTrICE) (n=102, red circle), the Chinese College of Intensive and Critical Care Medicine (CCICCM) (n=129, green circle), the United Council for Neurologic Subspecialties (UCNS) (n=289, magenta circle) and the American Academy of Neurology (AAN) (n=66, orange circle).



**Table 1. The professional background of participants in Delphi**

| Specialist                               | First round Delphi | Second round Delphi |
|------------------------------------------|--------------------|---------------------|
| General intensivists                     | 412 (37.7%)        | 49 (44.1%)          |
| Neurosurgeons                            | 244 (22.3%)        | 18 (16.2%)          |
| Neurologists                             | 139 (12.7%)        | 9 (8.2%)            |
| Neuro-intensivists                       | 95 (8.7%)          | 22 (19.8%)          |
| Medical physicians (except neurologists) | 53 (4.8%)          | 6 (5.4%)            |
| Surgeons (except neurosurgeons)          | 25 (2.3%)          | 1 (0.9%)            |
| Emergency physicians                     | 20 (1.8%)          | 1 (0.9%)            |
| Anesthesiologists                        | 13 (1.2%)          | 1 (0.9%)            |
| Rehabilitation physicians                | 4 (0.4%)           | 0                   |
| Nurses                                   | 70 (6.4%)          | 2 (1.8%)            |
| Respiratory therapists                   | 7 (0.6%)           | 1 (0.9%)            |
| Medical students                         | 12 (1.1%)          | 1 (0.9%)            |
| Total                                    | 1094               | 111                 |

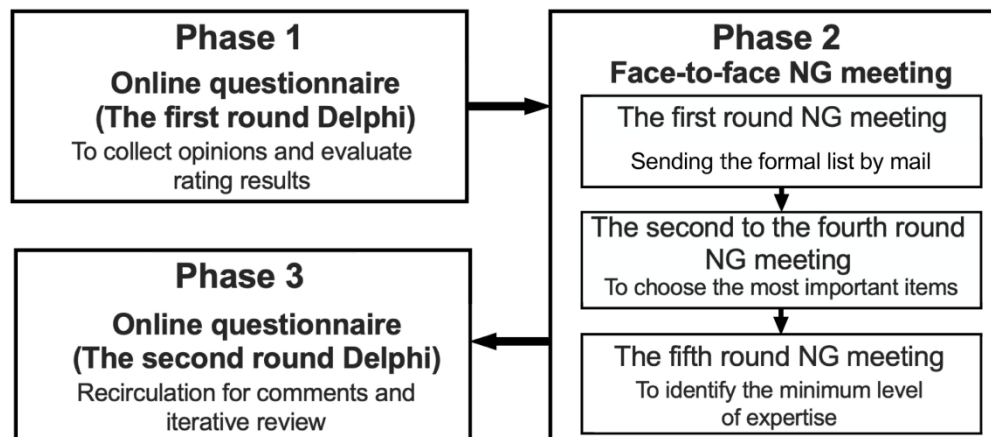

Figure 1. The study was conducted in three phases. In phase 1, a competencies list was generated and arranged during the first round of Delphi. In phase 2, five rounds of nominal group (NG) meetings were conducted to confirm the competencies list and levels of expertise. In phase 3, comments and iterative review were recirculated during the second round of Delphi.

213x93mm (300 x 300 DPI)

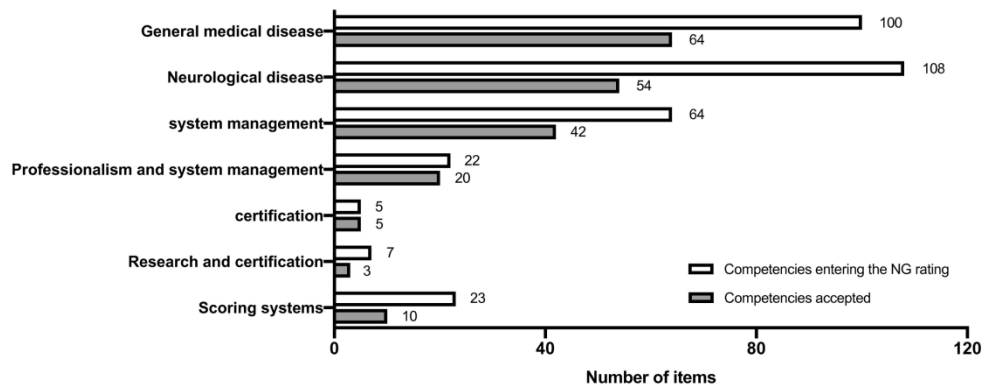

The numbers of competencies categorized into seven different themes. The number of competencies entering the nominal group (NG) rating that were finally accepted are shown.

247x99mm (300 x 300 DPI)

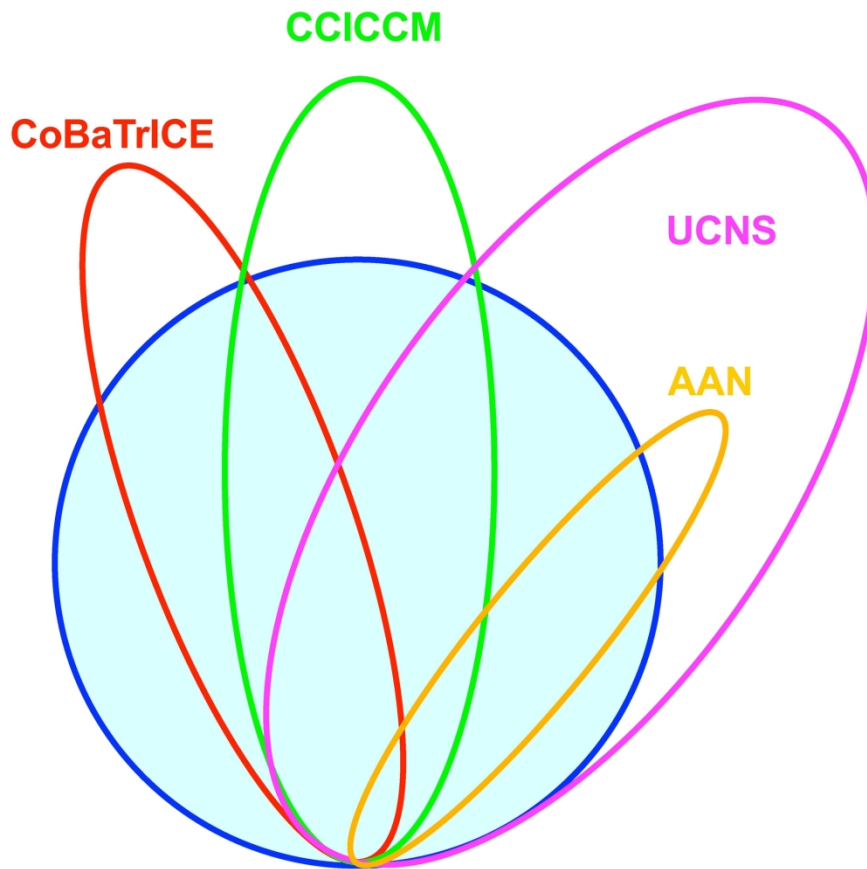

Figure 3. The intersection among the competencies list developed in the present study (n=198, blue circle) with other guidelines and statements, including the Competency Based Training in Intensive Care Medicine in Europe Collaboration (CoBaTrICE) (n=102, red circle), Chinese College of Intensive and Critical Care Medicine (CCICCM) (n=129, green circle), the United Council for Neurologic Subspecialties (UCNS) (n=289, magenta circle) and the American Academy of Neurology (AAN) (n=66, orange circle).

177x172mm (300 x 300 DPI)

1  
2  
3  
4  
5 **Core competencies in neurocritical care training in China: consensus developed by a national Delphi consensus survey combined with**  
6  
7 **nominal group technique**  
8

9 Zhen Cui, MD, Liang Gao, MD, Qi-Bing Huang, MD, Li-Hong Li, MD, Bing-Hui Qiu, MD, Guang-Zhi Shi, MD, PhD, Xiang-You Yu, MD, Yan Wang, BS, Li Zhang, RN, Yu-Mei Wang, MD, Linlin Zhang, MD,  
10 PhD, Jian-Xin Zhou, MD, PhD, on behalf of the Working Group from Neuro-Critical Care Committee affiliated to the Chinese Association of Critical Care Physicians and the National Center for Healthcare Quality  
11 Management in Neurological Diseases.  
12  
13

14  
15 **Online Supplementary Appendix 1**  
16

17 Contents

18 Table S1. The minimum level of expertise at the end of neurocritical care specialist training

19 Table S2. Constructing a competence statement

20 Table S3. Accepted items in the core competencies required for neurocritical care specialists and the supporting rate for each item

21 Table S4. Eliminated items during nominal group meeting  
22  
23  
24  
25  
26  
27  
28  
29  
30  
31  
32  
33  
34  
35  
36  
37  
38  
39  
40  
41  
42  
43  
44  
45  
46

1  
2  
3  
4  
5  
6  
7  
8  
9  
10  
11  
12  
13  
14  
15  
16  
17  
18  
19  
20  
21  
22  
23  
24  
25  
26  
27  
28  
29  
30  
31  
32  
33  
34  
35  
36  
37  
38  
39  
40  
41  
42  
43  
44  
45  
46

**Table S1. The minimum level of expertise at the end of neurocritical care specialist training**

| Levels | Descriptions                                                                           |
|--------|----------------------------------------------------------------------------------------|
| a      | Has knowledge of (describes) ...                                                       |
| b      | Performs (manages, conducts, demonstrates, assesses, interprets) ... under supervision |
| c      | Performs (manages, conducts, demonstrates, assesses, interprets) ... independently     |
| d      | Teaches or supervises others to perform (manages) ...                                  |

**Table S2. Constructing a competence statement**

|                       |                                                                             |                                                                              |                                      |                                                                  |
|-----------------------|-----------------------------------------------------------------------------|------------------------------------------------------------------------------|--------------------------------------|------------------------------------------------------------------|
| Context               | By the end of neurocritical care training, the trainee should be able to... |                                                                              |                                      |                                                                  |
| Level of expertise    | Level "a"<br>Has knowledge of (describes)...                                | Level "b"<br>Manages...under supervision                                     | Level "c"<br>Manages...independently | Level "d"<br>Teaches or supervises others to perform (manage)... |
|                       | Describes...                                                                | Manages...<br>Conducts...<br>Demonstrates...<br>Assesses...<br>Interprets... |                                      | Teaches...<br>Supervises...                                      |
| Content of competence | ...different types of shock...                                              |                                                                              |                                      |                                                                  |

1  
2  
3  
4  
5  
6  
7  
8  
9  
10  
11  
12  
13  
14  
15  
16  
17  
18  
19  
20  
21  
22  
23  
24  
25  
26  
27  
28  
29  
30  
31  
32  
33  
34  
35  
36  
37  
38  
39  
40  
41  
42  
43  
44  
45  
46

---

|         |                                                                                                                                       |
|---------|---------------------------------------------------------------------------------------------------------------------------------------|
| Example | By the end of neurocritical care training, the trainee should be able to recognize and manage different types of shock independently. |
|---------|---------------------------------------------------------------------------------------------------------------------------------------|

---

For peer review only



Table S3. Accepted items in the core competencies required for neurocritical care specialists and the supporting rate for each item

| Domain                         | Competency statement                     | Online survey (%) | Source*    | Agreement during round 1 to 4 NG rating (%) |         |         |         | Minimum level of expertise identified during round 5 NG meeting ‡ |
|--------------------------------|------------------------------------------|-------------------|------------|---------------------------------------------|---------|---------|---------|-------------------------------------------------------------------|
|                                |                                          |                   |            | Round 1                                     | Round 2 | Round 3 | Round 4 |                                                                   |
| A. Neurological disease states |                                          |                   |            |                                             |         |         |         |                                                                   |
|                                | 1. Cerebrovascular diseases              |                   |            |                                             |         |         |         |                                                                   |
|                                | 1.1. Manages infarction and ischemia     |                   |            |                                             |         |         |         |                                                                   |
|                                | a. Massive hemispheric infarction        | 97.5              | <i>U/A</i> | 100                                         |         |         |         | c                                                                 |
|                                | b. Basilar artery occlusion and stenosis | 95.2              | <i>U/A</i> | 100                                         |         |         |         | c                                                                 |
|                                | c. Carotid artery occlusion and stenosis | 95.2              | <i>U/A</i> | 100                                         |         |         |         | c                                                                 |
|                                | d. Delayed cerebral ischemia             | -                 | <i>O</i>   | 100                                         |         |         |         | c                                                                 |
|                                | 1.2. Manages intracerebral hemorrhage    |                   |            |                                             |         |         |         |                                                                   |
|                                | a. Supratentorial                        | 94.7              | <i>U/A</i> | 91                                          | 100     |         |         | c                                                                 |
|                                | b. Cerebellar                            | 97.0              | <i>U/A</i> | 100                                         |         |         |         | c                                                                 |
|                                | c. Brainstem                             | 97.5              | <i>U/A</i> | 100                                         |         |         |         | c                                                                 |
|                                | d. Intraventricular                      | 97.0              | <i>U/A</i> | 100                                         |         |         |         | c                                                                 |

|    |                                             |      |              |     |     |   |
|----|---------------------------------------------|------|--------------|-----|-----|---|
| 1  |                                             |      |              |     |     |   |
| 2  |                                             |      |              |     |     |   |
| 3  |                                             |      |              |     |     |   |
| 4  |                                             |      |              |     |     |   |
| 5  | e. Subarachnoid hemorrhage - aneurysmal and | 97.0 | <i>U/A</i>   | 100 | c   |   |
| 6  | others                                      |      |              |     |     |   |
| 7  |                                             |      |              |     |     |   |
| 8  | 1.3 Manages arteriovenous malformations     | 95.6 | <i>U</i>     | 100 | c   |   |
| 9  |                                             |      |              |     |     |   |
| 10 | 1.4 Manages carotid-cavernous fistulae      | 80.9 | <i>U</i>     | 100 | c   |   |
| 11 |                                             |      |              |     |     |   |
| 12 | 1.5 Manages cervical and cerebral arterial  |      |              |     |     |   |
| 13 | dissections under supervision               | 88.3 | <i>U</i>     | 100 | b   |   |
| 14 |                                             |      |              |     |     |   |
| 15 |                                             |      |              |     |     |   |
| 16 | 2. Neurotrauma                              |      |              |     |     |   |
| 17 |                                             |      |              |     |     |   |
| 18 | 2.1 Manages traumatic brain injury          |      |              |     |     |   |
| 19 |                                             |      |              |     |     |   |
| 20 | a. Axonal shearing injury                   | 85.8 | <i>U/A</i>   | 91  | 100 | c |
| 21 |                                             |      |              |     |     |   |
| 22 | b. Epidural hematoma                        | 96.1 | <i>U/A</i>   | 100 | c   |   |
| 23 |                                             |      |              |     |     |   |
| 24 | c. Subdural hematoma                        | 96.3 | <i>U/A</i>   | 100 | c   |   |
| 25 |                                             |      |              |     |     |   |
| 26 | d. Contusions and lacerations               | 95.7 | <i>U/A</i>   | 100 | c   |   |
| 27 |                                             |      |              |     |     |   |
| 28 | e. Penetrating craniocerebral injuries      | 92.4 | <i>U/A</i>   | 100 | c   |   |
| 29 |                                             |      |              |     |     |   |
| 30 | f. Traumatic SAH                            | 95.8 | <i>U/A</i>   | 100 | c   |   |
| 31 |                                             |      |              |     |     |   |
| 32 |                                             |      |              |     |     |   |
| 33 | 2.2. Manages spinal cord injury             | 95.1 | <i>U/A/C</i> | 100 | c   |   |
| 34 |                                             |      |              |     |     |   |
| 35 | 3. Status epilepticus                       |      |              |     |     |   |
| 36 |                                             |      |              |     |     |   |
| 37 |                                             |      |              |     |     |   |
| 38 |                                             |      |              |     |     |   |
| 39 |                                             |      |              |     |     |   |
| 40 |                                             |      |              |     |     |   |
| 41 |                                             |      |              |     |     |   |
| 42 |                                             |      |              |     |     |   |
| 43 |                                             |      |              |     |     |   |
| 44 |                                             |      |              |     |     |   |
| 45 |                                             |      |              |     |     |   |
| 46 |                                             |      |              |     |     |   |

|    |                                                                     |      |              |     |     |   |
|----|---------------------------------------------------------------------|------|--------------|-----|-----|---|
| 1  |                                                                     |      |              |     |     |   |
| 2  |                                                                     |      |              |     |     |   |
| 3  |                                                                     |      |              |     |     |   |
| 4  |                                                                     |      |              |     |     |   |
| 5  | 3.1 Manages convulsive status epilepticus                           | 97.8 | <i>U/A/C</i> | 100 |     | c |
| 6  |                                                                     |      |              |     |     |   |
| 7  | 3.2 Manages nonconvulsive status epilepticus                        | 89.0 | <i>U/A/C</i> | 100 |     | c |
| 8  |                                                                     |      |              |     |     |   |
| 9  | 3.3 Manages myoclonic epilepsy                                      | 91.7 | <i>U/A/C</i> | 100 |     | c |
| 10 |                                                                     |      |              |     |     |   |
| 11 | 4. Neuromuscular diseases                                           |      |              |     |     |   |
| 12 |                                                                     |      |              |     |     |   |
| 13 | 4.1 Manages myasthenia gravis                                       | 94.5 | <i>U/A</i>   | 100 |     | c |
| 14 |                                                                     |      |              |     |     |   |
| 15 | 4.2 Manages Guillain-Barré syndrome                                 | 88.3 | <i>U/A</i>   | 100 |     | c |
| 16 |                                                                     |      |              |     |     |   |
| 17 | 5. Infections                                                       |      |              |     |     |   |
| 18 |                                                                     |      |              |     |     |   |
| 19 |                                                                     |      |              |     |     |   |
| 20 | 5.1 Manages encephalitis (viral, bacterial,<br>parasitic)           | 97.5 | <i>U/A/C</i> | 100 |     | c |
| 21 |                                                                     |      |              |     |     |   |
| 22 |                                                                     |      |              |     |     |   |
| 23 | 5.2 Manages meningitis (viral, bacterial, parasitic)                | 98.5 | <i>U/A/C</i> | 100 |     | c |
| 24 |                                                                     |      |              |     |     |   |
| 25 | 5.3 Manages brain and spinal epidural abscess<br>under supervision  | 93.6 | <i>U/C</i>   | 100 |     | b |
| 26 |                                                                     |      |              |     |     |   |
| 27 |                                                                     |      |              |     |     |   |
| 28 |                                                                     |      |              |     |     |   |
| 29 | 6. Toxic-metabolic disorders                                        |      |              |     |     |   |
| 30 |                                                                     |      |              |     |     |   |
| 31 | 6.1 Manages drug overdose and withdrawal                            | 90.3 | <i>U/C/E</i> | 91  | 100 | c |
| 32 |                                                                     |      |              |     |     |   |
| 33 | 6.2 Manages temperature-related injuries                            | 93.6 | <i>U</i>     | 91  | 100 | c |
| 34 |                                                                     |      |              |     |     |   |
| 35 | 6.3 Manages carbon monoxide poisoning and<br>delayed encephalopathy | -    | <i>O</i>     | 73  | 100 | c |
| 36 |                                                                     |      |              |     |     |   |
| 37 |                                                                     |      |              |     |     |   |
| 38 |                                                                     |      |              |     |     |   |
| 39 |                                                                     |      |              |     |     |   |
| 40 |                                                                     |      |              |     |     |   |
| 41 |                                                                     |      |              |     |     |   |
| 42 |                                                                     |      |              |     |     |   |
| 43 |                                                                     |      |              |     |     |   |
| 44 |                                                                     |      |              |     |     |   |
| 45 |                                                                     |      |              |     |     |   |
| 46 |                                                                     |      |              |     |     |   |

## 7. Inflammatory and demyelinating diseases

|                                          |      |          |    |     |   |
|------------------------------------------|------|----------|----|-----|---|
| 7.1 Manages central pontine myelinolysis | 78.8 | <i>U</i> | 73 | 100 | c |
|------------------------------------------|------|----------|----|-----|---|

|                                            |   |          |    |     |   |
|--------------------------------------------|---|----------|----|-----|---|
| 7.2 Manages osmotic demyelination syndrome | - | <i>O</i> | 64 | 100 | c |
|--------------------------------------------|---|----------|----|-----|---|

## 8. Encephalopathies

|                                    |      |          |     |  |   |
|------------------------------------|------|----------|-----|--|---|
| 8.1 Manages hepatic encephalopathy | 91.9 | <i>U</i> | 100 |  | c |
|------------------------------------|------|----------|-----|--|---|

|                                             |      |          |     |  |   |
|---------------------------------------------|------|----------|-----|--|---|
| 8.2 Manages hypoxic-ischemic encephalopathy | 97.8 | <i>U</i> | 100 |  | c |
|---------------------------------------------|------|----------|-----|--|---|

|                                      |   |          |     |  |   |
|--------------------------------------|---|----------|-----|--|---|
| 8.3 Manages metabolic encephalopathy | - | <i>O</i> | 100 |  | c |
|--------------------------------------|---|----------|-----|--|---|

|                                                                                          |      |          |    |     |   |
|------------------------------------------------------------------------------------------|------|----------|----|-----|---|
| 8.4 Manages hypertensive encephalopathy and posterior reversible encephalopathy syndrome | 95.3 | <i>U</i> | 91 | 100 | c |
|------------------------------------------------------------------------------------------|------|----------|----|-----|---|

## 9. Neuroendocrine disorders

|                                |      |          |     |  |   |
|--------------------------------|------|----------|-----|--|---|
| 9.1 Manages pituitary apoplexy | 94.6 | <i>U</i> | 100 |  | c |
|--------------------------------|------|----------|-----|--|---|

|                                |      |          |     |  |   |
|--------------------------------|------|----------|-----|--|---|
| 9.2 Manages diabetes insipidus | 95.5 | <i>U</i> | 100 |  | c |
|--------------------------------|------|----------|-----|--|---|

|                                                                   |      |          |     |  |   |
|-------------------------------------------------------------------|------|----------|-----|--|---|
| 10. Manages movement disorders (severe dystonia and opisthotonos) | 91.6 | <i>U</i> | 100 |  | c |
|-------------------------------------------------------------------|------|----------|-----|--|---|

## 11. Clinical syndromes

|                                                       |      |              |     |  |   |
|-------------------------------------------------------|------|--------------|-----|--|---|
| 11.1 Teaches or supervises others in the Manages coma | 98.5 | <i>U/A/C</i> | 100 |  | d |
|-------------------------------------------------------|------|--------------|-----|--|---|

|    |                                              |      |              |     |     |   |
|----|----------------------------------------------|------|--------------|-----|-----|---|
| 1  |                                              |      |              |     |     |   |
| 2  |                                              |      |              |     |     |   |
| 3  |                                              |      |              |     |     |   |
| 4  |                                              |      |              |     |     |   |
| 5  | 11.2 Manages herniation syndromes            | 98.2 | <i>U/A</i>   | 100 |     | c |
| 6  |                                              |      |              |     |     |   |
| 7  | 11.3 Manages elevated intracranial pressure  | 97.7 | <i>U/C</i>   | 100 |     | c |
| 8  |                                              |      |              |     |     |   |
| 9  | 11.4 Manages intracranial                    |      |              |     |     |   |
| 10 | hypotension/hypovolemia                      | 95.9 | <i>U</i>     | 100 |     | c |
| 11 |                                              |      |              |     |     |   |
| 12 |                                              |      |              |     |     |   |
| 13 | 11.5 Manages hydrocephalus                   | 95.4 | <i>U/A</i>   | 100 |     | c |
| 14 |                                              |      |              |     |     |   |
| 15 | 11.6 Manages delirium                        | 98.1 | <i>U/A</i>   | 100 |     | c |
| 16 |                                              |      |              |     |     |   |
| 17 | 12. Manages perioperative neurosurgical care |      |              |     |     |   |
| 18 |                                              |      |              |     |     |   |
| 19 | 12.1 Manages postcraniotomy hypertension     | 96.1 | <i>U</i>     | 100 |     | c |
| 20 |                                              |      |              |     |     |   |
| 21 | 12.2 Manages postcraniotomy pain             | 93.3 | <i>U</i>     | 100 |     | c |
| 22 |                                              |      |              |     |     |   |
| 23 | 12.3 Manages wound cerebrospinal fluid leaks | 94.8 | <i>U</i>     | 91  | 100 | c |
| 24 |                                              |      |              |     |     |   |
| 25 | 12.4 Manages wound infections                | 95.6 | <i>U</i>     | 100 |     | c |
| 26 |                                              |      |              |     |     |   |
| 27 | 12.5 Manages postoperative brain edema       | 96.8 | <i>U/A</i>   | 100 |     | c |
| 28 |                                              |      |              |     |     |   |
| 29 | 12.6 Manages postcraniotomy intracranial     |      |              |     |     |   |
| 30 | hemorrhage                                   | 96.3 | <i>U</i>     | 100 |     | c |
| 31 |                                              |      |              |     |     |   |
| 32 |                                              |      |              |     |     |   |
| 33 | 12.7 Assesses and manages postcervical spine |      |              |     |     |   |
| 34 | surgery airway                               | 92.1 | <i>U</i>     | 100 |     | c |
| 35 |                                              |      |              |     |     |   |
| 36 |                                              |      |              |     |     |   |
| 37 | 12.8 Assesses and manages high-risk          | 96.8 | <i>U/C/E</i> | 100 |     | c |
| 38 |                                              |      |              |     |     |   |
| 39 |                                              |      |              |     |     |   |
| 40 |                                              |      |              |     |     |   |
| 41 |                                              |      |              |     |     |   |
| 42 |                                              |      |              |     |     |   |
| 43 |                                              |      |              |     |     |   |
| 44 |                                              |      |              |     |     |   |
| 45 |                                              |      |              |     |     |   |
| 46 |                                              |      |              |     |     |   |

1  
2  
3  
4  
5 neurosurgical patient postoperative

6  
7 13. Conducts neurorehabilitation 88.0 *U* 73 100 c

8  
9 B. General medical disease states

10  
11 1. Cardiovascular

12  
13 1.1 Recognizes and manages different types of  
14 shock 96.7 *U/C/E* 100 c

15  
16 1.2 Recognizes and manages myocardial  
17 infarction and unstable coronary syndromes 93.3 *U/C* 100

18  
19 1.3 Recognizes and manages neurogenic cardiac  
20 disturbances (electrocardiographic changes,  
21 stunned myocardium) 93.6 *U* 100 c

22  
23 1.4 Assesses and manages life-threatening  
24 arrhythmia 94.7 *U/C/E* 100 c

25  
26 1.5. Recognizes and manages left ventricular  
27 failure and/or acute pulmonary edema 95.0 *U/C* 100 c

28  
29 1.6. Recognizes and manages neurogenic  
30 pulmonary edema 94.7 *U* 100 c

31  
32 1.7 Recognizes and manages hypertension crisis 96.2 *U/C* 100 c

|    |                                                   |      |                |     |     |     |
|----|---------------------------------------------------|------|----------------|-----|-----|-----|
| 1  |                                                   |      |                |     |     |     |
| 2  |                                                   |      |                |     |     |     |
| 3  |                                                   |      |                |     |     |     |
| 4  |                                                   |      |                |     |     |     |
| 5  | 1.8 Performs and interprets cardiac output and    | 92.3 | <i>U/A/C/E</i> | 100 |     | c   |
| 6  | hemodynamic monitor                               |      |                |     |     |     |
| 7  |                                                   |      |                |     |     |     |
| 8  | 1.9 Performs electrocardiography and interprets   | 94.1 | <i>C/E</i>     | 91  | 100 | c   |
| 9  | the results                                       |      |                |     |     |     |
| 10 |                                                   |      |                |     |     |     |
| 11 | 2. Respiratory                                    |      |                |     |     |     |
| 12 |                                                   |      |                |     |     |     |
| 13 |                                                   |      |                |     |     |     |
| 14 | 2.1 Assesses and manages acute and chronic        | 97.8 | <i>U/C</i>     | 100 |     | c   |
| 15 | respiratory failure (type I and type II)          |      |                |     |     |     |
| 16 |                                                   |      |                |     |     |     |
| 17 | 2.2 Manages chronic obstructive pulmonary         | 94.2 | <i>U/C</i>     | 91  | 91  | 100 |
| 18 | disease and status asthmaticus under supervision  |      |                |     |     | b   |
| 19 |                                                   |      |                |     |     |     |
| 20 |                                                   |      |                |     |     |     |
| 21 | 2.3 Recognizes (diagnosis and grading) and        | 96.7 | <i>U/C/E</i>   | 100 |     | c   |
| 22 | manages acute respiratory distress syndrome       |      |                |     |     |     |
| 23 |                                                   |      |                |     |     |     |
| 24 | 2.4 Manages aspiration                            | 96.1 | <i>U</i>       | 100 |     | c   |
| 25 |                                                   |      |                |     |     |     |
| 26 | 2.5 Recognizes and manages upper airway           | 96.5 | <i>U/C</i>     | 100 |     | c   |
| 27 | obstruction                                       |      |                |     |     |     |
| 28 |                                                   |      |                |     |     |     |
| 29 |                                                   |      |                |     |     |     |
| 30 | 2.6 Recognizes and manages bronchopulmonary       | 97.4 | <i>U</i>       | 100 |     | c   |
| 31 | infections                                        |      |                |     |     |     |
| 32 |                                                   |      |                |     |     |     |
| 33 | 2.7 Recognizes and manages pleural diseases       | 92.4 | <i>U/C</i>     | 91  | 100 | c   |
| 34 | (empyema, effusion, pneumothorax)                 |      |                |     |     |     |
| 35 |                                                   |      |                |     |     |     |
| 36 | 2.8 Recognizes and manages neurogenic breathing   | 95.9 | <i>U</i>       | 91  | 100 | c   |
| 37 | patterns (central hyperventilation, Cheyne-Stokes |      |                |     |     |     |
| 38 |                                                   |      |                |     |     |     |
| 39 |                                                   |      |                |     |     |     |
| 40 |                                                   |      |                |     |     |     |
| 41 |                                                   |      |                |     |     |     |
| 42 |                                                   |      |                |     |     |     |
| 43 |                                                   |      |                |     |     |     |
| 44 |                                                   |      |                |     |     |     |
| 45 |                                                   |      |                |     |     |     |
| 46 |                                                   |      |                |     |     |     |

1  
2  
3  
4  
5 respirations, etc)

6  
7 2.9 Assesses and manages thromboembolic  
8 disease (including pulmonary embolism) under  
9 supervision

95.4

*C*

100

b

10  
11 2.10 Interprets chest radiographs

95.0

*U/C/E*

100

c

12  
13 2.11 Interprets chest CT image

96.1

*C*

100

c

14  
15 2.12 Performs and interprets end tidal CO<sub>2</sub>  
16 monitoring

92.0

*U*

100

c

17  
18 2.13 Performs and interprets arterial blood gas  
19 analysis

98.2

*C/E*

100

c

20  
21 2.14 Manages noninvasive and invasive  
22 mechanical ventilation: indication, rationale,  
23 complication, and weaning

97.8

*U/A/C/E*

100

c

24  
25 3. Renal

26  
27 3.1 Assesses and manages fluid, electrolytes  
28 disorders

98.2

*U/C/E*

100

c

29  
30 3.2 Recognizes (diagnosis and grading) and  
31 manages acute kidney injury

95.8

*U/C/E*

100

c

32  
33 3.3 Recognizes and manages derangements  
34 secondary to alterations in osmolality and

96.3

*U*

100

c



1  
2  
3  
4  
5 electrolytes

|    |                                                        |      |                |     |     |   |
|----|--------------------------------------------------------|------|----------------|-----|-----|---|
| 6  |                                                        |      |                |     |     |   |
| 7  | 3.4 Manages acid–base disorders                        | 97.9 | <i>U/A/C</i>   | 100 |     | c |
| 8  |                                                        |      |                |     |     |   |
| 9  | 3.5 Manages oliguria and polyuria                      | 97.0 | <i>U</i>       | 100 |     | c |
| 10 |                                                        |      |                |     |     |   |
| 11 | 3.6 Manages rhabdomyolysis under supervision           | 96.5 | <i>U</i>       | 91  | 100 | b |
| 12 |                                                        |      |                |     |     |   |
| 13 | 3.7 Conducts drug dose adjustment in renal failure     | 93.9 | <i>U/C</i>     | 91  | 100 | c |
| 14 |                                                        |      |                |     |     |   |
| 15 | 3.8 Manages cerebral salt wasting                      | 96.3 | <i>U</i>       | 100 |     | c |
| 16 |                                                        |      |                |     |     |   |
| 17 | 3.9 Manages syndrome of inappropriate                  |      |                |     |     |   |
| 18 | antidiuretic hormone                                   | 98.2 | <i>U</i>       | 91  | 100 | c |
| 19 |                                                        |      |                |     |     |   |
| 20 |                                                        |      |                |     |     |   |
| 21 | 4. Metabolic and endocrine effects of critical illness |      |                |     |     |   |
| 22 |                                                        |      |                |     |     |   |
| 23 | 4.1 Manages diabetes mellitus (ketotic and             |      |                |     |     |   |
| 24 | hyperglycemic hyperosmolar coma, hypoglycemia)         | 97.7 | <i>U/C</i>     | 100 |     | c |
| 25 |                                                        |      |                |     |     |   |
| 26 | 4.2 Manages systemic inflammatory response             |      |                |     |     |   |
| 27 | syndrome                                               | 93.5 | <i>U</i>       | 100 |     | c |
| 28 |                                                        |      |                |     |     |   |
| 29 |                                                        |      |                |     |     |   |
| 30 | 4.3 Performs enteral/parenteral nutritional support    | 97.7 | <i>U/A/C/E</i> | 100 |     | c |
| 31 |                                                        |      |                |     |     |   |
| 32 | 4.4 Manages pituitary crisis under supervision         | -    | <i>O</i>       | 73  | 100 | b |
| 33 |                                                        |      |                |     |     |   |
| 34 | 5. Infectious disease                                  |      |                |     |     |   |
| 35 |                                                        |      |                |     |     |   |
| 36 | 5.1 Complies with infection control measures           | 97.0 | <i>U/C/E</i>   | 100 |     | c |
| 37 |                                                        |      |                |     |     |   |
| 38 |                                                        |      |                |     |     |   |
| 39 |                                                        |      |                |     |     |   |
| 40 |                                                        |      |                |     |     |   |
| 41 |                                                        |      |                |     |     |   |
| 42 |                                                        |      |                |     |     |   |
| 43 |                                                        |      |                |     |     |   |
| 44 |                                                        |      |                |     |     |   |
| 45 |                                                        |      |                |     |     |   |
| 46 |                                                        |      |                |     |     |   |

|    |                                                   |      |              |     |     |
|----|---------------------------------------------------|------|--------------|-----|-----|
| 1  |                                                   |      |              |     |     |
| 2  |                                                   |      |              |     |     |
| 3  |                                                   |      |              |     |     |
| 4  |                                                   |      |              |     |     |
| 5  | 5.2 Performs antimicrobial agent selection and    | 97.1 | <i>U/C/E</i> | 100 | c   |
| 6  | determines dose in critically ill patients        |      |              |     |     |
| 7  |                                                   |      |              |     |     |
| 8  | 5.3 Manages hospital acquired and opportunistic   | 97.8 | <i>U/A/C</i> | 100 | c   |
| 9  | infections in the critically ill patient          |      |              |     |     |
| 10 |                                                   |      |              |     |     |
| 11 | 5.4 Assesses and manages fever in critically ill  | 97.2 | <i>U/C</i>   | 91  | 100 |
| 12 | patient                                           |      |              |     | c   |
| 13 |                                                   |      |              |     |     |
| 14 |                                                   |      |              |     |     |
| 15 | 5.5 Conducts interpretation of antibiotic         | 96.9 | <i>U/E</i>   | 100 | c   |
| 16 | concentrations and sensitivities                  |      |              |     |     |
| 17 |                                                   |      |              |     |     |
| 18 | 5.6 Recognizes and manages sepsis, severe sepsis, | 95.2 | <i>C/E</i>   | 100 | c   |
| 19 | and septic shock                                  |      |              |     |     |
| 20 |                                                   |      |              |     |     |
| 21 |                                                   |      |              |     |     |
| 22 | 5.7 Recognizes and manages multi-drug resistance  | -    | <i>O</i>     | 100 | c   |
| 23 | bacteria infection                                |      |              |     |     |
| 24 |                                                   |      |              |     |     |
| 25 | 5.8 Performs antimicrobial agent selection in     | -    | <i>O</i>     | 100 | c   |
| 26 | neurological infections                           |      |              |     |     |
| 27 |                                                   |      |              |     |     |
| 28 |                                                   |      |              |     |     |
| 29 | 6. Acute hematologic disorders                    |      |              |     |     |
| 30 |                                                   |      |              |     |     |
| 31 | 6.1 Manages disseminated intravascular            | 97.3 | <i>U/C</i>   | 100 | b   |
| 32 | coagulation under supervision                     |      |              |     |     |
| 33 |                                                   |      |              |     |     |
| 34 | 6.2 Conducts anticoagulation and fibrinolytic     | 96.8 | <i>U/A/C</i> | 100 | c   |
| 35 | therapy                                           |      |              |     |     |
| 36 |                                                   |      |              |     |     |
| 37 |                                                   |      |              |     |     |
| 38 |                                                   |      |              |     |     |
| 39 |                                                   |      |              |     |     |
| 40 |                                                   |      |              |     |     |
| 41 |                                                   |      |              |     |     |
| 42 |                                                   |      |              |     |     |
| 43 |                                                   |      |              |     |     |
| 44 |                                                   |      |              |     |     |
| 45 |                                                   |      |              |     |     |
| 46 |                                                   |      |              |     |     |

|    |                                                     |      |              |     |     |   |
|----|-----------------------------------------------------|------|--------------|-----|-----|---|
| 1  |                                                     |      |              |     |     |   |
| 2  |                                                     |      |              |     |     |   |
| 3  |                                                     |      |              |     |     |   |
| 4  |                                                     |      |              |     |     |   |
| 5  | 6.3 Conducts blood component therapy                | 96.4 | <i>U/CE</i>  | 91  | 100 | c |
| 6  |                                                     |      |              |     |     |   |
| 7  | 6.4 Conducts hemostatic therapy                     | 96.8 | <i>U</i>     | 100 |     | c |
| 8  |                                                     |      |              |     |     |   |
| 9  | 6.5 Recognizes and manages hypercoagulable          |      |              |     |     |   |
| 10 | states under supervision                            | 95.8 | <i>U</i>     | 82  | 100 | b |
| 11 |                                                     |      |              |     |     |   |
| 12 |                                                     |      |              |     |     |   |
| 13 | 6.6 Recognizes and manages traumatic                |      |              |     |     |   |
| 14 | coagulopathy                                        | 94.5 | <i>C</i>     | 91  | 100 | c |
| 15 |                                                     |      |              |     |     |   |
| 16 | 7. Acute gastrointestinal and genitourinary         |      |              |     |     |   |
| 17 | disorders                                           |      |              |     |     |   |
| 18 |                                                     |      |              |     |     |   |
| 19 | 7.1 Assesses and manages gastrointestinal           |      |              |     |     |   |
| 20 | bleeding                                            | 97.7 | <i>U/C</i>   | 91  | 100 | c |
| 21 |                                                     |      |              |     |     |   |
| 22 |                                                     |      |              |     |     |   |
| 23 | 7.2 Prescribes stress ulcer prophylaxis             | 96.4 | <i>C</i>     | 91  | 100 | c |
| 24 |                                                     |      |              |     |     |   |
| 25 | 7.3 Assesses and manages abdominal                  |      |              |     |     |   |
| 26 | compartment syndrome                                | 96.4 | <i>U/C</i>   | 82  | 100 | c |
| 27 |                                                     |      |              |     |     |   |
| 28 | 8. Immunology and transplantation                   |      |              |     |     |   |
| 29 |                                                     |      |              |     |     |   |
| 30 | 8.1 Interprets principles of transplantation (brain |      |              |     |     |   |
| 31 | death, organ donation, procurement, maintenance     | 85.5 | <i>U/A/E</i> | 73  | 100 | b |
| 32 | of organ donors, implantation) under supervision    |      |              |     |     |   |
| 33 |                                                     |      |              |     |     |   |
| 34 |                                                     |      |              |     |     |   |
| 35 | 9. General trauma and burns                         |      |              |     |     |   |
| 36 |                                                     |      |              |     |     |   |
| 37 |                                                     |      |              |     |     |   |
| 38 |                                                     |      |              |     |     |   |
| 39 |                                                     |      |              |     |     |   |
| 40 |                                                     |      |              |     |     |   |
| 41 |                                                     |      |              |     |     |   |
| 42 |                                                     |      |              |     |     |   |
| 43 |                                                     |      |              |     |     |   |
| 44 |                                                     |      |              |     |     |   |
| 45 |                                                     |      |              |     |     |   |
| 46 |                                                     |      |              |     |     |   |

|    |                                                 |      |              |     |     |     |
|----|-------------------------------------------------|------|--------------|-----|-----|-----|
| 1  |                                                 |      |              |     |     |     |
| 2  |                                                 |      |              |     |     |     |
| 3  |                                                 |      |              |     |     |     |
| 4  |                                                 |      |              |     |     |     |
| 5  | 9.1 Assesses and provides initial management of | 93.8 | <i>U/C/E</i> | 91  | 100 | c   |
| 6  | trauma patient                                  |      |              |     |     |     |
| 7  |                                                 |      |              |     |     |     |
| 8  | 9.2 Manages spine and pelvis trauma             | 91.0 | <i>U</i>     | 82  | 100 | c   |
| 9  |                                                 |      |              |     |     |     |
| 10 | 9.3 Manages chest and abdominal trauma          | 91.0 | <i>U</i>     | 91  | 100 | c   |
| 11 |                                                 |      |              |     |     |     |
| 12 | 9.4 Manages crush syndrome                      | -    | <i>O</i>     | 91  | 100 | c   |
| 13 |                                                 |      |              |     |     |     |
| 14 | 9.5 Describes burns and electrical injury       | 86.4 | <i>U/E</i>   | 64  | 82  | 100 |
| 15 |                                                 |      |              |     |     | a   |
| 16 |                                                 |      |              |     |     |     |
| 17 | 10. Transport                                   |      |              |     |     |     |
| 18 |                                                 |      |              |     |     |     |
| 19 | 10.1 Teaches or supervises patient assessment   | 97.4 | <i>C/E</i>   | 100 |     | d   |
| 20 | before transport                                |      |              |     |     |     |
| 21 |                                                 |      |              |     |     |     |
| 22 | 10.2 Prepares equipment for transport           | 95.9 | <i>C</i>     | 100 |     | c   |
| 23 |                                                 |      |              |     |     |     |
| 24 | 10.3 Performs intrahospital transport           | 96.8 | <i>C</i>     | 100 |     | c   |
| 25 |                                                 |      |              |     |     |     |
| 26 |                                                 |      |              |     |     |     |
| 27 | 11.Others                                       |      |              |     |     |     |
| 28 |                                                 |      |              |     |     |     |
| 29 | 11.1 Assesses and manages multiorgan            | 93.5 | <i>C</i>     | 100 |     | c   |
| 30 | dysfunction syndrome                            |      |              |     |     |     |
| 31 |                                                 |      |              |     |     |     |
| 32 | 11.2 Manages ICU acquired weakness under        | -    | <i>O</i>     | 82  | 100 | b   |
| 33 | supervision                                     |      |              |     |     |     |
| 34 |                                                 |      |              |     |     |     |

C. Critical care monitoring practical procedures

|    |                                                               |      |                |     |     |   |
|----|---------------------------------------------------------------|------|----------------|-----|-----|---|
| 1  |                                                               |      |                |     |     |   |
| 2  |                                                               |      |                |     |     |   |
| 3  |                                                               |      |                |     |     |   |
| 4  |                                                               |      |                |     |     |   |
| 5  | 1. Monitoring                                                 |      |                |     |     |   |
| 6  |                                                               |      |                |     |     |   |
| 7  | 1.1 Performs neuromonitoring                                  | 96.1 | <i>U</i>       | 100 |     | c |
| 8  |                                                               |      |                |     |     |   |
| 9  | 1.2 Interprets principles of ECG monitoring                   | 98.2 | <i>U</i>       | 100 |     | c |
| 10 |                                                               |      |                |     |     |   |
| 11 | 1.3 Performs and interprets invasive hemodynamic monitor      | 95.2 | <i>U/C</i>     | 100 |     | c |
| 12 |                                                               |      |                |     |     |   |
| 13 | 1.4 Performs and interprets noninvasive hemodynamic           |      |                |     |     |   |
| 14 | monitor                                                       | 95.4 | <i>U/C</i>     | 100 |     | c |
| 15 |                                                               |      |                |     |     |   |
| 16 | 1.5 Performs and interprets respiratory mechanics monitor     |      |                |     |     |   |
| 17 | under supervision                                             | 95.4 | <i>U/C</i>     | 100 |     | b |
| 18 |                                                               |      |                |     |     |   |
| 19 |                                                               |      |                |     |     |   |
| 20 | 1.6 Performs and interprets metabolic monitoring under        |      |                |     |     |   |
| 21 | supervision (oxygen consumption, carbon dioxide               |      |                |     |     |   |
| 22 | production, respiratory quotient)                             | 94.3 | <i>U</i>       | 100 |     | b |
| 23 |                                                               |      |                |     |     |   |
| 24 |                                                               |      |                |     |     |   |
| 25 | 1.7 Conducts multimodality monitoring in NICU                 | 95.2 | <i>U</i>       | 91  | 100 | c |
| 26 |                                                               |      |                |     |     |   |
| 27 | 2. General critical care practical procedures and therapeutic |      |                |     |     |   |
| 28 | interventions                                                 |      |                |     |     |   |
| 29 |                                                               |      |                |     |     |   |
| 30 |                                                               |      |                |     |     |   |
| 31 | 2.1 Performs arterial catheterization                         | 96.2 | <i>U/A/C/E</i> | 73  | 100 | c |
| 32 |                                                               |      |                |     |     |   |
| 33 | 2.2 Teaches or supervises others central venous catheter      |      |                |     |     |   |
| 34 | insertion                                                     | 96.4 | <i>U/A/C/E</i> | 100 |     | d |
| 35 |                                                               |      |                |     |     |   |
| 36 | 2.3 Conducts vasoactive/inotropic medication therapy          | 97.4 | <i>U/C/E</i>   | 100 |     | c |
| 37 |                                                               |      |                |     |     |   |
| 38 |                                                               |      |                |     |     |   |
| 39 |                                                               |      |                |     |     |   |
| 40 |                                                               |      |                |     |     |   |
| 41 |                                                               |      |                |     |     |   |
| 42 |                                                               |      |                |     |     |   |
| 43 |                                                               |      |                |     |     |   |
| 44 |                                                               |      |                |     |     |   |
| 45 |                                                               |      |                |     |     |   |
| 46 |                                                               |      |                |     |     |   |

|    |                                                            |      |                |     |     |   |
|----|------------------------------------------------------------|------|----------------|-----|-----|---|
| 1  |                                                            |      |                |     |     |   |
| 2  |                                                            |      |                |     |     |   |
| 3  |                                                            |      |                |     |     |   |
| 4  |                                                            |      |                |     |     |   |
| 5  | 2.4 Teaches or supervises others to perform                |      |                |     |     |   |
| 6  | cardiopulmonary resuscitation, postresuscitation brain     | 98.2 | <i>U/CE</i>    | 100 |     | d |
| 7  | protection, to provide advanced life support for           |      |                |     |     |   |
| 8  | postresuscitation patient                                  |      |                |     |     |   |
| 9  |                                                            |      |                |     |     |   |
| 10 |                                                            |      |                |     |     |   |
| 11 | 2.5 Teaches or supervises others to perform cardioversion  | 98.1 | <i>C/E</i>     | 100 |     | d |
| 12 | and defibrillation                                         |      |                |     |     |   |
| 13 |                                                            |      |                |     |     |   |
| 14 | 2.6 Performs airway maintenance and ventilation in         | 97.4 | <i>U/A/C/E</i> | 100 |     | c |
| 15 | nonintubated/unconscious patients                          |      |                |     |     |   |
| 16 |                                                            |      |                |     |     |   |
| 17 | 2.7 Performs tracheal intubation                           | 96.7 | <i>U/A/C</i>   | 100 |     | c |
| 18 |                                                            |      |                |     |     |   |
| 19 | 2.8 Performs difficult and failed airway management        | 90.7 | <i>E</i>       | 100 |     | c |
| 20 |                                                            |      |                |     |     |   |
| 21 | 2.9 Performs and interprets intra-abdominal pressure       | 88.6 | <i>C</i>       | 73  | 100 | c |
| 22 | monitor                                                    |      |                |     |     |   |
| 23 |                                                            |      |                |     |     |   |
| 24 | 2.10 Teaches or supervises others to perform tracheal      | 94.9 | <i>C/E</i>     | 82  | 100 | d |
| 25 | aspiration                                                 |      |                |     |     |   |
| 26 |                                                            |      |                |     |     |   |
| 27 | 2.11 Teaches or supervises others to perform oxygen        | 97.4 | <i>C/E</i>     | 100 |     | d |
| 28 | therapy                                                    |      |                |     |     |   |
| 29 |                                                            |      |                |     |     |   |
| 30 | 2.12 Performs fiberoptic bronchoscopy and bronchoalveolar  | 92.0 | <i>U/E</i>     | 91  | 100 | b |
| 31 | lavage in the intubated patient under supervision          |      |                |     |     |   |
| 32 |                                                            |      |                |     |     |   |
| 33 | 2.13 Explains and performs recruitment maneuver: principle | 93.4 | <i>C</i>       | 100 |     | b |
| 34 | and practice under supervision                             |      |                |     |     |   |
| 35 |                                                            |      |                |     |     |   |
| 36 |                                                            |      |                |     |     |   |
| 37 |                                                            |      |                |     |     |   |
| 38 |                                                            |      |                |     |     |   |
| 39 |                                                            |      |                |     |     |   |
| 40 |                                                            |      |                |     |     |   |
| 41 |                                                            |      |                |     |     |   |
| 42 |                                                            |      |                |     |     |   |
| 43 |                                                            |      |                |     |     |   |
| 44 |                                                            |      |                |     |     |   |
| 45 |                                                            |      |                |     |     |   |
| 46 |                                                            |      |                |     |     |   |

|    |                                                              |      |                |     |    |     |   |
|----|--------------------------------------------------------------|------|----------------|-----|----|-----|---|
| 1  |                                                              |      |                |     |    |     |   |
| 2  |                                                              |      |                |     |    |     |   |
| 3  |                                                              |      |                |     |    |     |   |
| 4  |                                                              |      |                |     |    |     |   |
| 5  | 2.14 Performs thoracocentesis via a chest drain              | 91.0 | <i>U/C/E</i>   | 100 |    |     | c |
| 6  |                                                              |      |                |     |    |     |   |
| 7  | 2.15 Performs percutaneous tracheostomy                      | 91.2 | <i>U/E</i>     | 100 |    |     | c |
| 8  |                                                              |      |                |     |    |     |   |
| 9  | 2.16 Performs bedside ultrasound to localize pleural         |      |                |     |    |     |   |
| 10 | effusion and ascites under supervision                       | 89.9 | <i>C</i>       | 73  | 82 | 100 | b |
| 11 |                                                              |      |                |     |    |     |   |
| 12 | 2.17 Assesses inferior caval vein by ultrasound under        |      |                |     |    |     |   |
| 13 | supervision                                                  | -    | <i>O</i>       | 82  | 91 | 100 | b |
| 14 |                                                              |      |                |     |    |     |   |
| 15 | 2.18 Performs ultrasound techniques for vascular             |      |                |     |    |     |   |
| 16 | localization                                                 | 89.9 | <i>E</i>       | 73  | 82 | 100 | c |
| 17 |                                                              |      |                |     |    |     |   |
| 18 | 2.19 Performs thyrocriocentesis under supervision            | -    | <i>O</i>       | 82  | 91 | 100 | b |
| 19 |                                                              |      |                |     |    |     |   |
| 20 |                                                              |      |                |     |    |     |   |
| 21 |                                                              |      |                |     |    |     |   |
| 22 | 3. Neurocritical care practical procedures and therapeutic   |      |                |     |    |     |   |
| 23 | interventions                                                |      |                |     |    |     |   |
| 24 |                                                              |      |                |     |    |     |   |
| 25 | 3.1 Performs lumbar puncture                                 | 93.8 | <i>U/A/C/E</i> | 100 |    |     | c |
| 26 |                                                              |      |                |     |    |     |   |
| 27 | 3.2 Performs shunt and ventricular drain tap for CSF         |      |                |     |    |     |   |
| 28 | sampling                                                     | 94.1 | <i>U</i>       | 100 |    |     | c |
| 29 |                                                              |      |                |     |    |     |   |
| 30 | 3.3 Manages external ventricular drains                      | 93.8 | <i>U</i>       | 100 |    |     | c |
| 31 |                                                              |      |                |     |    |     |   |
| 32 | 3.4 Assesses and manages pain of neurocritical care patients | 96.2 | <i>U/A/C/E</i> | 100 |    |     | c |
| 33 |                                                              |      |                |     |    |     |   |
| 34 | 3.5 Assesses sedation and describes principle                | 97.0 | <i>U/A/C</i>   | 100 |    |     | c |
| 35 |                                                              |      |                |     |    |     |   |
| 36 | 3.6 Interprets and manages of ICP and cerebral perfusion     | 94.5 | <i>U/A</i>     | 100 |    |     | c |
| 37 |                                                              |      |                |     |    |     |   |
| 38 |                                                              |      |                |     |    |     |   |
| 39 |                                                              |      |                |     |    |     |   |
| 40 |                                                              |      |                |     |    |     |   |
| 41 |                                                              |      |                |     |    |     |   |
| 42 |                                                              |      |                |     |    |     |   |
| 43 |                                                              |      |                |     |    |     |   |
| 44 |                                                              |      |                |     |    |     |   |
| 45 |                                                              |      |                |     |    |     |   |
| 46 |                                                              |      |                |     |    |     |   |

1  
2  
3  
4  
5 pressure data  
6

7 3.7 Interprets of saturation of jugular venous oxygenation  
8 and brain tissue oxygen data under supervision 86.9 *U* 73 100 b  
9

10 3.8 Performs systemic moderate hypothermia under  
11 supervision 95.4 *U* 100 b  
12

13 3.9 Manages fluid and conducts osmotic dehydration  
14 treatment 96.3 *O* 100 c  
15

16 3.10 Performs and interprets cerebral multimodality  
17 monitoring (pH, partial pressure of carbon dioxide, laser  
18 Doppler, microdialysis) under supervision 89.9 *U/A* 82 100 b  
19

20 3.11 Performs lumbar drain insertion 84.2 *U* 82 100 c  
21

22 3.12 Manages and inserts ICP monitoring 87.4 *U/A* 82 100 c  
23

24 3.13 Manages cerebral oximetric or perfusion monitoring  
25 under supervision 90.1 *U/A* 91 100 b  
26

27 3.14 Performs brain ventricle puncture under supervision - *O* 91 100 b  
28

29 3.15 Interprets CT/MRI of nervous system under  
30 supervision 94.8 *U* 73 82 100 b  
31

32 3.16 Chooses neuromuscular blockade and describes  
33 indication of it under supervision 88.6 *C/E* 82 82 100 b  
34  
35  
36  
37  
38  
39  
40  
41  
42  
43  
44  
45  
46



## D. Professionalism and system management

|                                                                                                                                                                          |      |                |     |     |   |
|--------------------------------------------------------------------------------------------------------------------------------------------------------------------------|------|----------------|-----|-----|---|
| 1. Gather accurate, essential information from all sources, including medical interviews, physical examinations, medical records and Laboratory and radiological results | 96.7 | <i>U/C/E</i>   | 100 |     | c |
| 2. Integrates clinical findings with laboratory investigations to form a differential diagnosis                                                                          | 97.1 | <i>U/C/E</i>   | 100 |     | c |
| 3. Involves patients (or their surrogates if applicable) in decisions about care and treatment (including informed consent and end-of-life care)                         | 96.9 | <i>U/A/C/E</i> | 100 |     | c |
| 4. Promotes collaborative practice principles, including multidisciplinary cooperation and effective team working                                                        | 97.0 | <i>U/E</i>     | 100 |     | c |
| 5. Ensures continuity of care through effective handover of clinical information                                                                                         | 97.7 | <i>C/E</i>     | 100 |     | c |
| 6. Describes implications of chronic and comorbid disease in the acutely ill patient                                                                                     | 93.5 | <i>C/E</i>     | 91  | 100 | c |
| 7. Seeks learning opportunities and integrates new knowledge into clinical practice                                                                                      | 98.2 | <i>U/C/E</i>   | 100 |     | c |
| 8. Applies knowledge to clinical problem solving, clinical decision making, and critical thinking.                                                                       | 98.3 | <i>U/E</i>     | 100 |     | c |
| 9. Develops a clinically applicable knowledge of the basic                                                                                                               | 98.1 | <i>U</i>       | 100 |     | c |

and clinical sciences that underlie the practice of  
neurointensive care

|                                                                                                                                     |      |              |     |     |   |
|-------------------------------------------------------------------------------------------------------------------------------------|------|--------------|-----|-----|---|
| 10. Provides effective and professional consultation to physicians and health care professionals of other specialty                 | 97.5 | <i>U</i>     | 100 |     | c |
| 11. Maintains accurate medical records and documentation                                                                            | 97.5 | <i>U/C/E</i> | 100 |     | c |
| 12. Communicates the continuing care requirements of patients at ICU discharge to health care professionals, patients and relatives | 96.9 | <i>E</i>     | 100 |     | b |
| 13. Manages the safe and timely discharge of patients from ICU                                                                      | 93.5 | <i>C/E</i>   | 100 |     | c |
| 14. Identifies and minimizes risk of critical incidents and adverse events                                                          | 97.5 | <i>C/E</i>   | 100 |     | c |
| 15. Recognizes and identifies deficiencies in peer performance                                                                      | 96.9 | <i>U</i>     | 91  | 100 | c |
| 16. Identifies environmental hazards and promotes safety for patients and staff                                                     | 97.3 | <i>C/E</i>   | 82  | 100 | c |
| 17. Communicates effectively with patients, relatives and members of the healthcare team                                            | 98.6 | <i>U/C/E</i> | 100 |     | c |
| 18. Respects privacy, dignity, confidentiality, and legal constraints on the use of patient data                                    | 98.3 | <i>U/C/E</i> | 100 |     | c |

|                                                                                                                                                                                                    |      |              |     |   |
|----------------------------------------------------------------------------------------------------------------------------------------------------------------------------------------------------|------|--------------|-----|---|
| 19. Demonstrates sensitivity and responsiveness to gender, age, culture, religion, sexual preference, socioeconomic status, beliefs, behaviors and an awareness of their impact on decision making | 97.5 | <i>U/E</i>   | 100 | c |
| 20. Demonstrates respect, compassion, integrity, and altruism in relationships with patients, families, and colleagues.                                                                            | 97.9 | <i>U</i>     | 100 | c |
| E. Ethical and legal aspects of critical care medicine                                                                                                                                             |      |              |     |   |
| 1. Evaluates death and dying, performs brainstem death testing under supervision                                                                                                                   | 98.0 | <i>U/A/E</i> | 100 | b |
| 2. Manages palliative care of the critically ill patient, forgos life-sustaining treatment and orders not to resuscitate under supervision                                                         | 96.7 | <i>U/E</i>   | 100 | b |
| 3. Applies and describes practice to minimize the physical and psychosocial consequences of critical illness for patients and families under supervision                                           | 96.4 | <i>C/E</i>   | 100 | b |
| 4. Formulates clinical decisions with respect for ethical and legal principles                                                                                                                     | 96.7 | <i>U/C/E</i> | 100 | c |
| 5. Adheres to principles of confidentiality, scientific/academic integrity, and informed consent.                                                                                                  | 96.8 | <i>U</i>     | 100 | c |
| F. Principles of research and certification                                                                                                                                                        |      |              |     |   |

|    |                                                                              |      |          |     |     |   |
|----|------------------------------------------------------------------------------|------|----------|-----|-----|---|
| 1  |                                                                              |      |          |     |     |   |
| 2  |                                                                              |      |          |     |     |   |
| 3  |                                                                              |      |          |     |     |   |
| 4  |                                                                              |      |          |     |     |   |
| 5  | 1. Presentation preparation and skills                                       | 90.7 | <i>U</i> | 73  | 100 | c |
| 6  |                                                                              |      |          |     |     |   |
| 7  | 2. Certification                                                             |      |          |     |     |   |
| 8  |                                                                              |      |          |     |     |   |
| 9  | 2.1 Basic life support                                                       | 96.2 | <i>C</i> | 100 |     | d |
| 10 |                                                                              |      |          |     |     |   |
| 11 | 2.2 Advanced cardiac life support                                            | 97.0 | <i>C</i> | 100 |     | c |
| 12 |                                                                              |      |          |     |     |   |
| 13 | G. Scoring systems                                                           |      |          |     |     |   |
| 14 |                                                                              |      |          |     |     |   |
| 15 | 1. General status scoring                                                    |      |          |     |     |   |
| 16 |                                                                              |      |          |     |     |   |
| 17 | 1.1 Acute physiology and chronic health evaluation II                        | 95.1 | <i>C</i> | 100 |     | c |
| 18 |                                                                              |      |          |     |     |   |
| 19 | 1.2 Simplified acute physiology score II                                     | 89.2 | <i>C</i> | 73  | 100 | c |
| 20 |                                                                              |      |          |     |     |   |
| 21 | 2. Organs scoring:                                                           |      |          |     |     |   |
| 22 |                                                                              |      |          |     |     |   |
| 23 | 2.1 Acute kidney injury scoring (KDIGO)                                      | 90.6 | -        | 73  | 100 | c |
| 24 |                                                                              |      |          |     |     |   |
| 25 | 2.2 Sequential organ failure assessment                                      | 89.5 | <i>C</i> | 91  | 100 | c |
| 26 |                                                                              |      |          |     |     |   |
| 27 | 3. Sedation, pain and delirium scoring:                                      |      |          |     |     |   |
| 28 |                                                                              |      |          |     |     |   |
| 29 | 3.1 Critical care pain observation tool                                      | 91.3 | -        | 100 |     | d |
| 30 |                                                                              |      |          |     |     |   |
| 31 | 3.2 Richmond agitation-sedation scale                                        | 94.9 | -        | 100 |     | c |
| 32 |                                                                              |      |          |     |     |   |
| 33 | 3.3 The confusion assessment method for the diagnosis of delirium in the ICU | 92.8 | -        | 100 |     | c |
| 34 |                                                                              |      |          |     |     |   |
| 35 |                                                                              |      |          |     |     |   |
| 36 |                                                                              |      |          |     |     |   |
| 37 |                                                                              |      |          |     |     |   |
| 38 |                                                                              |      |          |     |     |   |
| 39 |                                                                              |      |          |     |     |   |
| 40 |                                                                              |      |          |     |     |   |
| 41 |                                                                              |      |          |     |     |   |
| 42 |                                                                              |      |          |     |     |   |
| 43 |                                                                              |      |          |     |     |   |
| 44 |                                                                              |      |          |     |     |   |
| 45 |                                                                              |      |          |     |     |   |
| 46 |                                                                              |      |          |     |     |   |

|                                               |      |          |     |     |   |
|-----------------------------------------------|------|----------|-----|-----|---|
| 3.4 Self-rating anxiety scale                 | 94.6 | <i>O</i> | 100 |     | c |
| 4. Neural system scoring                      |      |          |     |     |   |
| 4.1 Glasgow coma scale                        | 97.0 | -        | 100 |     | d |
| 4.2 National institute of health stroke scale | 89.8 | <i>O</i> | 82  | 100 | c |

\* Source of list: *U*: United Council for Neurologic Subspecialties, *A*: American Academy of Neurology, *C*: Chinese College of Intensive and Critical Care Medicine, *E*: Competency-based Training Programme in ICM for Europe, *O*: Online Delphi, -: during generation and rearrangement of competencies list before the first round of Delphi.

‡ Minimum level of expertise identified during the fifth round nominal group (NG) meeting:

Level a: Has knowledge of (describes) ...

Level b: Performs (manages, conducts, demonstrates, assesses, interprets) ... under supervision

Level c: Performs (manages, conducts, demonstrates, assesses, interprets) ... independently

Level d: Teaches or supervises others to perform (manages) ...

1  
2  
3  
4  
5  
6  
7  
8  
9  
10  
11  
12  
13  
14  
15  
16  
17  
18  
19  
20  
21  
22  
23  
24  
25  
26  
27  
28  
29  
30  
31  
32  
33  
34  
35  
36  
37  
38  
39  
40  
41  
42  
43  
44  
45  
46

**Table S4. Eliminated items during nominal group meeting**

| Domain                         | Eliminated items                                     | Median (IQR) in the fourth round NG rating |
|--------------------------------|------------------------------------------------------|--------------------------------------------|
| A. Neurological disease states |                                                      |                                            |
|                                | 1. Cerebrovascular diseases                          |                                            |
|                                | 1.1 Infarction and ischemia                          |                                            |
|                                | a. Transient ischemic attacks aggravate              | 4 (4, 5)                                   |
|                                | b. Occlusive vasculopathies (Moya-Moya, sickle cell) | 4 (4, 5)                                   |
|                                | c. Spinal cord infarction                            | 4 (2, 4)                                   |
|                                | 1.2. Vascular malformations                          |                                            |
|                                | a. AV fistulas                                       | 5 (4, 5)                                   |
|                                | b. Cavernous angiomas                                | 4 (4,5)                                    |
|                                | c. Venous angiomas                                   | 4 (4, 5)                                   |
|                                | 1.3 Dural sinus thrombosis                           | 5 (4, 5)                                   |
|                                | 1.4 Cerebral amyloid angiopathy                      | 5 (4, 5)                                   |
|                                | 1.5 Stroke mimics                                    | 3 (2, 4)                                   |
|                                | 1.6 Traumatic aneurysm                               | 5 (4, 5)                                   |

---

|    |                                                           |          |
|----|-----------------------------------------------------------|----------|
| 1  |                                                           |          |
| 2  |                                                           |          |
| 3  |                                                           |          |
| 4  |                                                           |          |
| 5  | 2. Neurotrauma                                            |          |
| 6  |                                                           |          |
| 7  | 2.1 Traumatic brain injury                                |          |
| 8  |                                                           |          |
| 9  | a. Skull fracture                                         | 5 (5, 5) |
| 10 |                                                           |          |
| 11 | b. Fat emboli                                             | 5 (3, 5) |
| 12 |                                                           |          |
| 13 | 3. Neuromuscular diseases                                 |          |
| 14 |                                                           |          |
| 15 | 3.1 Amyotrophic lateral sclerosis                         | 4 (3, 4) |
| 16 |                                                           |          |
| 17 | 3.2 Rhabdomyolysis and toxic myopathies                   | 5 (4, 5) |
| 18 |                                                           |          |
| 19 | 3.3 Critical illness myopathy and neuropathy              | 5 (4, 5) |
| 20 |                                                           |          |
| 21 | 3.4 Multiple sclerosis                                    | 4 (2, 4) |
| 22 |                                                           |          |
| 23 | 3.5 Mitochondrial encephalomyopathy                       | 2 (1, 4) |
| 24 |                                                           |          |
| 25 | 3.6 Hypokalemic periodic paralysis                        | 4 (2, 4) |
| 26 |                                                           |          |
| 27 | 4. Infections                                             |          |
| 28 |                                                           |          |
| 29 | 4.1 Tetanus                                               | 4 (4, 5) |
| 30 |                                                           |          |
| 31 | 4.2 Botulism                                              | 3 (3, 4) |
| 32 |                                                           |          |
| 33 | 5. Toxic-metabolic disorders                              |          |
| 34 |                                                           |          |
| 35 | 5.1 Neuroleptic malignant syndrome/malignant hyperthermia | 5 (4, 5) |
| 36 |                                                           |          |
| 37 |                                                           |          |
| 38 |                                                           |          |
| 39 |                                                           |          |
| 40 |                                                           |          |
| 41 |                                                           |          |
| 42 |                                                           |          |
| 43 |                                                           |          |
| 44 |                                                           |          |
| 45 |                                                           |          |
| 46 |                                                           |          |

---

|                                                                                                                 |          |
|-----------------------------------------------------------------------------------------------------------------|----------|
| 5.2 Serotonin syndrome                                                                                          | 2 (2, 3) |
| 5.3 Wernicke's encephalopathy                                                                                   | 3 (2, 4) |
| 6. Inflammatory and demyelinating diseases                                                                      |          |
| 6.1 Multiple sclerosis                                                                                          | 4 (3, 4) |
| 6.2 Neurosarcoidosis                                                                                            | 4 (2, 5) |
| 6.3 Acute disseminated encephalomyelitis                                                                        | 4 (3, 5) |
| 6.4 Central nervous system vasculitis                                                                           | 4 (2, 5) |
| 6.5 Chemical or sterile meningitis (i.e., posterior fossa syndrome, nonsteroidal antiinflammatory drug-induced) | 4 (2, 5) |
| 6.6 Autoimmune encephalitis                                                                                     | 4 (4, 5) |
| 7. Encephalopathies                                                                                             |          |
| 7.1 Eclampsia, including hemolysis, elevated liver enzymes, low platelet count syndrome                         | 5 (5, 5) |
| 7.2 Uremic encephalopathy                                                                                       | 5 (4, 5) |
| 7.3 Mitochondrial encephalopathy, lactic acidosis, and stroke like (episodes) and related disorders             | 4 (2, 5) |
| 7.4 Creutzfeldt-jakob encephalopathy                                                                            | 3 (2, 4) |
| 8. Neuroendocrine disorders                                                                                     |          |
| 8.1 Panhypopituitarism                                                                                          | 4 (4, 5) |



---

|                                                          |          |
|----------------------------------------------------------|----------|
| 8.2 Multinle endocrine neoplasia                         | 3 (2, 4) |
| 9. Movement disorders                                    |          |
| 9.1 Hemiballismus                                        | 2 (1, 4) |
| 9.2 Acute dystonic reactions                             | 3 (1, 4) |
| 9.3 Amyotrophic lateral sclerosis                        | 4 (2, 4) |
| 10. Clinical Syndromes                                   |          |
| 10.1 Vegetative state                                    | 5 (5, 5) |
| 10.2 Abulia                                              | 5 (5, 5) |
| 10.3 Dysautonomia (central fever, hyperventilation, etc) | 5 (5, 5) |
| 10.4 Psychiatric emergencies                             | 5 (4, 5) |
| 10.5 Locked-in syndrome                                  | 4 (3, 5) |
| 10.6 Cord compression                                    | 5 (4, 5) |
| 10.7 Brain death                                         | 5 (4, 5) |
| 11. Perioperative neurosurgical care                     |          |
| 11.1 Intracranial pneumatosis                            | 5 (4, 5) |
| 11.2 Postcraniotomy CSF hypovolemia                      | 5 (5, 5) |

---

|                                                                                       |          |
|---------------------------------------------------------------------------------------|----------|
| 11.3 Postcarotid endarterectomy/stenting hyperperfusion syndrome                      | 5 (4, 5) |
| 12. Neuro-Oncology                                                                    |          |
| 12.1 Brain tumors and metastases                                                      | 5 (5, 5) |
| 12.2 Spinal cord tumors and metastases                                                | 4 (4, 5) |
| 12.3 Carcinomatous meningitis                                                         | 3 (2, 4) |
| 12.4 Paraneoplastic syndromes                                                         | 4 (2, 4) |
| 13. Pharmacotherapeutics                                                              | 5 (4, 5) |
| B. General medical disease states                                                     |          |
| 1. Cardiovascular                                                                     |          |
| 1.1 Acute aortic and peripheral vascular disorders (i.e., dissection, pseudoaneurysm) | 5 (4, 5) |
| 1.2 Rupture of aneurysm (bleeding and cardiac tamponade)                              | 5 (4, 5) |
| 1.3 Acute myocarditis                                                                 | 4 (2, 5) |
| 1.4 Cardiac-cerebralsyndrome                                                          | 4 (4, 5) |
| 1.5 Right heart failure                                                               | 5 (4, 5) |
| 2. Respiratory                                                                        |          |
| 2.1 Pulmonary hemorrhage and massive hemoptysis                                       | 5 (5, 5) |

---

|                                                                                     |          |
|-------------------------------------------------------------------------------------|----------|
| 2.2 Sleep apnea                                                                     | 4 (2, 5) |
| 2.3 Obesity-hypoventilation syndrome                                                | 4 (2, 4) |
| 2.4 Smoke inhalation, airway burns                                                  | 4 (2, 5) |
| 3. Renal                                                                            |          |
| 3.1 Critically ill patients with chronic renal failure                              | 4 (4, 5) |
| 3.2 Continuous renal replacement therapy                                            | 5 (3, 5) |
| 4. Metabolic and endocrine effects of critical illness                              |          |
| 4.1 Thyroid storm                                                                   | 5 (4, 5) |
| 4.2 Adrenal crisis                                                                  | 5 (4, 5) |
| 4.3 Pheochromocytoma                                                                | 4 (4, 5) |
| 4.4 Disorders of calcium and magnesium balance                                      | 5 (3, 5) |
| 4.5 Hypothyroidism                                                                  | 4 (4, 5) |
| 4.6 Low serum T3 syndrome                                                           | 3 (2, 5) |
| 5. Infectious disease                                                               |          |
| 5.1 Severe community acquired infection (e.g., severe community-acquired pneumonia) | 4 (4, 5) |
| 5.2 HIV/AIDS                                                                        | 4 (3, 5) |

---

|    |                                                                                |          |
|----|--------------------------------------------------------------------------------|----------|
| 1  |                                                                                |          |
| 2  |                                                                                |          |
| 3  |                                                                                |          |
| 4  |                                                                                |          |
| 5  | 5.3 Atypical pathogens and viral infections                                    | 4 (4, 5) |
| 6  |                                                                                |          |
| 7  | 5.4 Fever in critically ill patient                                            | 5 (4, 5) |
| 8  |                                                                                |          |
| 9  | 6. Acute hematologic disorders                                                 |          |
| 10 |                                                                                |          |
| 11 | 6.1 Acute hemolytic disorders including thrombotic microangiopathies           | 5 (4, 5) |
| 12 |                                                                                |          |
| 13 | 7. Acute GI and genitourinary disorders                                        |          |
| 14 |                                                                                |          |
| 15 | 7.1 Acute and fulminant hepatic failure (including drug dosing)                | 5 (4, 5) |
| 16 |                                                                                |          |
| 17 | 7.2 Ileus and toxic megacolon                                                  | 4 (3, 5) |
| 18 |                                                                                |          |
| 19 | 7.3 Acute perforations of the gastrointestinal tract                           | 4 (4, 5) |
| 20 |                                                                                |          |
| 21 | 7.4 Acute vascular disorders of the intestine, including mesenteric infarction | 4 (3, 5) |
| 22 |                                                                                |          |
| 23 | 7.5 Acute intestinal obstruction, volvulus                                     | 4 (3, 5) |
| 24 |                                                                                |          |
| 25 | 7.6 Pancreatitis                                                               | 4 (4, 5) |
| 26 |                                                                                |          |
| 27 | 7.7 Urinary tract bleeding                                                     | 4 (3, 5) |
| 28 |                                                                                |          |
| 29 | 7.8 Obstructive uropathy, acute urinary retention                              | 4 (3, 5) |
| 30 |                                                                                |          |
| 31 | 7.9 Intra-abdominal infection and gastrointestinal leakage                     | 5 (4, 5) |
| 32 |                                                                                |          |
| 33 | 8. Immunology and transplantation                                              |          |
| 34 |                                                                                |          |
| 35 | 8.1 Immunosuppression, especially the neurotoxicity of these agents            | 3 (2, 5) |
| 36 |                                                                                |          |
| 37 |                                                                                |          |
| 38 |                                                                                |          |
| 39 |                                                                                |          |
| 40 |                                                                                |          |
| 41 |                                                                                |          |
| 42 |                                                                                |          |
| 43 |                                                                                |          |
| 44 |                                                                                |          |
| 45 |                                                                                |          |
| 46 |                                                                                |          |

---

|    |                                                                               |          |
|----|-------------------------------------------------------------------------------|----------|
| 1  |                                                                               |          |
| 2  |                                                                               |          |
| 3  |                                                                               |          |
| 4  |                                                                               |          |
| 5  | 9.Others                                                                      |          |
| 6  |                                                                               |          |
| 7  | 9.1 Acute illness in pregnancy                                                | 5 (4, 5) |
| 8  |                                                                               |          |
| 9  | 9.2 Acute illness in pediatric                                                | 4 (3, 5) |
| 10 |                                                                               |          |
| 11 | 9.3 Initial approach to the manages multisystem trauma                        | 5 (4, 5) |
| 12 |                                                                               |          |
| 13 | 9.4.ICU sleep disorders                                                       | 5 (4, 5) |
| 14 |                                                                               |          |
| 15 |                                                                               |          |
| 16 | C. Critical care monitoring practical procedures                              |          |
| 17 |                                                                               |          |
| 18 | 1. General critical care practical procedures and therapeutic interventions   |          |
| 19 |                                                                               |          |
| 20 | 1.1 Peripheral venous line placement                                          | 5 (4, 5) |
| 21 |                                                                               |          |
| 22 | 1.2 Nasogastric tube placement                                                | 4 (3, 5) |
| 23 |                                                                               |          |
| 24 | 1.3 Urinary catheterization                                                   | 4 (3, 5) |
| 25 |                                                                               |          |
| 26 | 1.4 Administration of nitric oxide or prostacyclin                            | 3 (2, 4) |
| 27 |                                                                               |          |
| 28 | 1.5 Fiberoptic laryngoscopy                                                   | 4 (4, 5) |
| 29 |                                                                               |          |
| 30 | 1.6 Echocardiography                                                          | 4 (4, 5) |
| 31 |                                                                               |          |
| 32 | 1.7 Pulmonary ultrasonography                                                 | 4 (4, 5) |
| 33 |                                                                               |          |
| 34 | 1.8 Percutaneous gastrostomy                                                  | 2 (1, 4) |
| 35 |                                                                               |          |
| 36 | 1.9 Extracorporeal membrane oxygenation and other circulatory support systems | 3 (2, 5) |
| 37 |                                                                               |          |
| 38 |                                                                               |          |
| 39 |                                                                               |          |
| 40 |                                                                               |          |
| 41 |                                                                               |          |
| 42 |                                                                               |          |
| 43 |                                                                               |          |
| 44 |                                                                               |          |
| 45 |                                                                               |          |
| 46 |                                                                               |          |

---

|      |                                                                                                                                                      |          |
|------|------------------------------------------------------------------------------------------------------------------------------------------------------|----------|
| 1.10 | Enteral nutrition nasogastric tube placement                                                                                                         | 5 (4, 5) |
| 1.11 | Pericardiocentesis                                                                                                                                   | 4 (3, 5) |
| 1.12 | Sengstaken tube (or equivalent) placement                                                                                                            | 3 (3, 5) |
| 1.13 | Indications for gastroscopy                                                                                                                          | 4 (4, 5) |
| 2.   | Neurocritical care practical procedures and therapeutic interventions                                                                                |          |
| 2.1  | Interpretation of continuous electroencephalogram monitoring                                                                                         | 5 (4, 5) |
| 2.2  | Jugular venous bulb catheterization                                                                                                                  | 4 (3, 5) |
| 2.3  | Plasmapheresis and intravenous immunoglobulin                                                                                                        | 4 (4, 5) |
| 2.4  | Administration of intravenous and intraventricular thrombolysis                                                                                      | 4 (3, 5) |
| 2.5  | Intrathecal administration of chemotherapy, and radiographic agents                                                                                  | 5 (4, 5) |
| 2.6  | Nervous system ultrasound                                                                                                                            | 4 (3, 5) |
| 2.7  | Interpretation of single photon emission-CT and positron emission tomography                                                                         | 3 (2, 3) |
| 2.8  | Positron emission tomography                                                                                                                         | 3 (2, 3) |
| 2.9  | Endovascular neurosurgical training (e.g., Guglielmi detachable coil placement, arterial stenting, cerebral angioplasty, intraarterial thrombolysis) | 3 (2, 4) |

D. Professionalism and system management

---

|    |                                                                                                    |          |
|----|----------------------------------------------------------------------------------------------------|----------|
| 1  |                                                                                                    |          |
| 2  |                                                                                                    |          |
| 3  |                                                                                                    |          |
| 4  |                                                                                                    |          |
| 5  | 1. Describes and explains the managerial and administrative responsibilities of the ICM specialist | 5 (4, 5) |
| 6  |                                                                                                    |          |
| 7  | 2. Medical economics: health care reimbursement, budget development                                | 4 (4, 5) |
| 8  |                                                                                                    |          |
| 9  | F. Principles of research and certification                                                        |          |
| 10 |                                                                                                    |          |
| 11 | 1. Study design                                                                                    | 4 (4, 5) |
| 12 |                                                                                                    |          |
| 13 | 2. Biostatistics                                                                                   | 4 (4, 5) |
| 14 |                                                                                                    |          |
| 15 | 3. Grant funding and protocol writing                                                              | 4 (4, 4) |
| 16 |                                                                                                    |          |
| 17 | 4. Manuscript preparation                                                                          | 4 (4, 5) |
| 18 |                                                                                                    |          |
| 19 | 5. Institutional review boards and health insurance portability and accountability act             | 4 (3, 5) |
| 20 |                                                                                                    |          |
| 21 |                                                                                                    |          |
| 22 | G. Scoring systems                                                                                 |          |
| 23 |                                                                                                    |          |
| 24 | 1.General status scoring:                                                                          |          |
| 25 |                                                                                                    |          |
| 26 | 1.1 Therapeutic Intervention Scoring System                                                        | 4 (4, 4) |
| 27 |                                                                                                    |          |
| 28 | 1.2 Multiple organ dysfunction score                                                               | 4 (3, 5) |
| 29 |                                                                                                    |          |
| 30 | 2. Organs scoring:                                                                                 |          |
| 31 |                                                                                                    |          |
| 32 | 2.1 Killip class                                                                                   | 4 (4, 5) |
| 33 |                                                                                                    |          |
| 34 | 2.2 NYHA class                                                                                     | 5 (4, 5) |
| 35 |                                                                                                    |          |
| 36 | 2.3 Acute lung injury scoring                                                                      | 4 (4, 5) |
| 37 |                                                                                                    |          |
| 38 |                                                                                                    |          |
| 39 |                                                                                                    |          |
| 40 |                                                                                                    |          |
| 41 |                                                                                                    |          |
| 42 |                                                                                                    |          |
| 43 |                                                                                                    |          |
| 44 |                                                                                                    |          |
| 45 |                                                                                                    |          |
| 46 |                                                                                                    |          |

1  
2  
3  
4  
5  
6  
7  
8  
9  
10  
11  
12  
13  
14  
15  
16  
17  
18  
19  
20  
21  
22  
23  
24  
25  
26  
27  
28  
29  
30  
31  
32  
33  
34  
35  
36  
37  
38  
39  
40  
41  
42  
43  
44  
45  
46

|                                                        |          |
|--------------------------------------------------------|----------|
| 2.4 The Child-Pugh score                               | 4 (4, 4) |
| 2.5 Acute kidney injury scoring (AKIN, RIFLE)          | 4 (3, 5) |
| 2.6 Acute pancreatitis scoring                         | 4 (4, 5) |
| 3. Sedation, pain and delirium scoring:                |          |
| 3.1 Ramsay sedation score                              | 4 (2, 5) |
| 3.2 CHADS-2 risk scores in chronic atrial fibrillation | 4 (3, 5) |
| 4. Trauma scoring                                      |          |
| 4.1 Injury severity score                              | 4 (4, 5) |
| 4.2 Abbreviated injury scale                           | 4 (4, 5) |

---



1  
2  
3  
4  
5 **Core competencies in neurocritical care training in China: consensus developed by a national Delphi consensus survey combined with**  
6  
7 **nominal group technique**  
8

9  
10 Zhen Cui, MD, Liang Gao, MD, Qi-Bing Huang, MD, Li-Hong Li, MD, Bing-Hui Qiu, MD, Guang-Zhi Shi, MD, PhD, Xiang-You Yu, MD, Yan Wang, BS, Li Zhang, RN, Yu-Mei Wang, MD, Linlin Zhang, MD,  
11 PhD, Jian-Xin Zhou, MD, PhD, on behalf of the Working Group from Neuro-Critical Care Committee affiliated to the Chinese Association of Critical Care Physicians and the National Center for Healthcare Quality  
12 Management in Neurological Diseases.  
13

14  
15 **Online Supplementary Appendix 2**  
16  
17  
18  
19

20 **Comparison of core competencies established in the present study with those from other international bodies**  
21  
22

| Items in our core competencies                                                                                             | Overlap with other sources |     |           |        |
|----------------------------------------------------------------------------------------------------------------------------|----------------------------|-----|-----------|--------|
|                                                                                                                            | UCNS                       | AAN | CoBaTrICE | CCICCM |
| <b>A. Neurological disease states</b>                                                                                      |                            |     |           |        |
| <b>1. Cerebrovascular diseases</b>                                                                                         |                            |     |           |        |
| 1.1. By the end of neurocritical care training, the trainee should be able to manage infarction and ischemia independently |                            |     |           |        |
| 1.1.1. Massive hemispheric infarction                                                                                      | √                          | √   |           |        |
| 1.1.2. Basilar artery occlusion and stenosis                                                                               | √                          | √   |           |        |

1  
2  
3  
4  
5  
6  
7  
8  
9  
10  
11  
12  
13  
14  
15  
16  
17  
18  
19  
20  
21  
22  
23  
24  
25  
26  
27  
28  
29  
30  
31  
32  
33  
34  
35  
36  
37  
38  
39  
40  
41  
42  
43  
44  
45  
46

|                                                                                                                                                   |   |   |  |  |
|---------------------------------------------------------------------------------------------------------------------------------------------------|---|---|--|--|
| 1.1.3. Carotid artery occlusion and stenosis                                                                                                      | √ | √ |  |  |
| 1.1.4. Delayed cerebral ischemia                                                                                                                  |   |   |  |  |
| 1.2. By the end of neurocritical care training, the trainee should be able to manage intracerebral hemorrhage independently                       |   |   |  |  |
| 1.2.1. Supratentorial                                                                                                                             | √ | √ |  |  |
| 1.2.2. Cerebellar                                                                                                                                 | √ | √ |  |  |
| 1.2.3. Brainstem                                                                                                                                  | √ | √ |  |  |
| 1.2.4. Intraventricular                                                                                                                           | √ | √ |  |  |
| 1.2.5 Subarachnoid hemorrhage aneurysmal and others                                                                                               | √ | √ |  |  |
| 1.3. By the end of neurocritical care training, the trainee should be able to manage arteriovenous malformations independently                    | √ |   |  |  |
| 1.4. By the end of neurocritical care training, the trainee should be able to manage carotidcavernous fistulae independently                      | √ |   |  |  |
| 1.5. By the end of neurocritical care training, the trainee should be able to manage cervical and cerebral arterial dissections under supervision | √ |   |  |  |
| <b>2. Neurotrauma</b>                                                                                                                             |   |   |  |  |
| 2.1. By the end of neurocritical care training, the trainee should be able to manage                                                              |   |   |  |  |

|    |                                                                                      |   |   |  |   |
|----|--------------------------------------------------------------------------------------|---|---|--|---|
| 1  | traumatic brain injury independently                                                 |   |   |  |   |
| 2  |                                                                                      |   |   |  |   |
| 3  |                                                                                      |   |   |  |   |
| 4  |                                                                                      |   |   |  |   |
| 5  | 2.1.1. Axonal shearing injury                                                        | √ | √ |  |   |
| 6  |                                                                                      |   |   |  |   |
| 7  | 2.1.2. Epidural hematoma                                                             | √ | √ |  |   |
| 8  |                                                                                      |   |   |  |   |
| 9  | 2.1.3. Subdural hematoma                                                             | √ | √ |  |   |
| 10 |                                                                                      |   |   |  |   |
| 11 | 2.1.4. Contusions and lacerations                                                    | √ | √ |  |   |
| 12 |                                                                                      |   |   |  |   |
| 13 | 2.1.5. Penetrating craniocerebral injuries                                           | √ | √ |  |   |
| 14 |                                                                                      |   |   |  |   |
| 15 | 2.1.6. Traumatic SAH                                                                 | √ | √ |  |   |
| 16 |                                                                                      |   |   |  |   |
| 17 | 2.2 By the end of neurocritical care training, the trainee should be able to manage  |   |   |  |   |
| 18 | spinal cord injury independently                                                     | √ | √ |  | √ |
| 19 |                                                                                      |   |   |  |   |
| 20 | <b>3. Status epilepticus</b>                                                         |   |   |  |   |
| 21 |                                                                                      |   |   |  |   |
| 22 | 3.1. By the end of neurocritical care training, the trainee should be able to manage |   |   |  |   |
| 23 | convulsive status epilepticus independently                                          | √ | √ |  | √ |
| 24 |                                                                                      |   |   |  |   |
| 25 | 3.2. By the end of neurocritical care training, the trainee should be able to manage |   |   |  |   |
| 26 | nonconvulsive status epilepticus independently                                       | √ | √ |  | √ |
| 27 |                                                                                      |   |   |  |   |
| 28 | 3.3. By the end of neurocritical care training, the trainee should be able to manage |   |   |  |   |
| 29 | myoclonic epilepsy independently                                                     | √ | √ |  | √ |
| 30 |                                                                                      |   |   |  |   |
| 31 | <b>4. Neuromuscular diseases</b>                                                     |   |   |  |   |
| 32 |                                                                                      |   |   |  |   |
| 33 |                                                                                      |   |   |  |   |
| 34 |                                                                                      |   |   |  |   |
| 35 |                                                                                      |   |   |  |   |
| 36 |                                                                                      |   |   |  |   |
| 37 |                                                                                      |   |   |  |   |
| 38 |                                                                                      |   |   |  |   |
| 39 |                                                                                      |   |   |  |   |
| 40 |                                                                                      |   |   |  |   |
| 41 |                                                                                      |   |   |  |   |
| 42 |                                                                                      |   |   |  |   |
| 43 |                                                                                      |   |   |  |   |
| 44 |                                                                                      |   |   |  |   |
| 45 |                                                                                      |   |   |  |   |
| 46 |                                                                                      |   |   |  |   |

|                                                                                                                                               |   |   |   |   |
|-----------------------------------------------------------------------------------------------------------------------------------------------|---|---|---|---|
| 4.1. By the end of neurocritical care training, the trainee should be able to manage myasthenia gravis independently                          | √ | √ |   |   |
| 4.2. By the end of neurocritical care training, the trainee should be able to manage GuillainBarré syndrome independently                     | √ | √ |   |   |
| <b>5. Infections</b>                                                                                                                          |   |   |   |   |
| 5.1. By the end of neurocritical care training, the trainee should be able to manage encephalitis (viral, bacterial, parasitic) independently | √ | √ |   | √ |
| 5.2. By the end of neurocritical care training, the trainee should be able to manage meningitis (viral, bacterial, parasitic) independently   | √ | √ |   | √ |
| 5.3. By the end of neurocritical care training, the trainee should be able to manage brain and spinal epidural abscess under supervision      | √ |   |   | √ |
| <b>6. Toxicometabolic disorders</b>                                                                                                           |   |   |   |   |
| 6.1. By the end of neurocritical care training, the trainee should be able to manage drug overdose and withdrawal independently               | √ |   | √ | √ |
| 6.2. By the end of neurocritical care training, the trainee should be able to manage temperaturerelated injuries independently                | √ |   |   |   |
| 6.3. By the end of neurocritical care training, the trainee should be able to manage                                                          |   |   |   |   |

|                                                                                                                                                                                        |   |  |  |  |
|----------------------------------------------------------------------------------------------------------------------------------------------------------------------------------------|---|--|--|--|
| carbon monoxide poisoning and delayed encephalopathy independently                                                                                                                     |   |  |  |  |
| <b>7. Inflammatory and demyelinating diseases</b>                                                                                                                                      |   |  |  |  |
| 7.1. By the end of neurocritical care training, the trainee should be able to manage central pontine myelinolysis independently                                                        | √ |  |  |  |
| 7.2. By the end of neurocritical care training, the trainee should be able to manage osmotic demyelination syndrome independently                                                      |   |  |  |  |
| <b>8. Encephalopathies</b>                                                                                                                                                             |   |  |  |  |
| 8.1. By the end of neurocritical care training, the trainee should be able to manage hepatic encephalopathy independently                                                              | √ |  |  |  |
| 8.2. By the end of neurocritical care training, the trainee should be able to manage hypoxicischemic encephalopathy independently                                                      | √ |  |  |  |
| 8.3. By the end of neurocritical care training, the trainee should be able to manage metabolic encephalopathy independently                                                            |   |  |  |  |
| 8.4. By the end of neurocritical care training, the trainee should be able to manage hypertensive encephalopathy and posterior reversible encephalopathy syndrome (PRES) independently | √ |  |  |  |
| <b>9. Neuroendocrine disorders</b>                                                                                                                                                     |   |  |  |  |

|                                                                                                                                                           |   |   |   |   |
|-----------------------------------------------------------------------------------------------------------------------------------------------------------|---|---|---|---|
| 9.1. By the end of neurocritical care training, the trainee should be able to manage pituitary apoplexy independently                                     | √ |   |   |   |
| 9.2. By the end of neurocritical care training, the trainee should be able to manage diabetes insipidus independently                                     | √ |   |   |   |
| <b>10. Movement disorders</b>                                                                                                                             |   |   |   |   |
| 10.1. By the end of neurocritical care training, the trainee should be able to manage movement disorders (severe dystonia and opisthotonos) independently | √ |   |   |   |
| <b>11. Clinical syndromes</b>                                                                                                                             |   |   |   |   |
| 11.1. By the end of neurocritical care training, the trainee should be able to teach or supervise others to manages coma                                  | √ | √ |   | √ |
| 11.2. By the end of neurocritical care training, the trainee should be able to manage herniation syndromes independentl                                   | √ |   | √ | √ |
| 11.3. By the end of neurocritical care training, the trainee should be able to manage elevated intracranial pressure independently                        | √ |   | √ | √ |
| 11.4. By the end of neurocritical care training, the trainee should be able to manage intracranial hypotension/ hypovolemia independently                 | √ |   | √ |   |
| 11.5. By the end of neurocritical care training, the trainee should be able to manage                                                                     | √ | √ | √ |   |

|                                                                                                                                            |   |   |  |  |
|--------------------------------------------------------------------------------------------------------------------------------------------|---|---|--|--|
| hydrocephalus independently                                                                                                                |   |   |  |  |
| 11.6. By the end of neurocritical care training, the trainee should be able to manage delirium independently                               | √ | √ |  |  |
| <b>12. Perioperative neurosurgical care</b>                                                                                                |   |   |  |  |
| 12.1. By the end of neurocritical care training, the trainee should be able to manage postcraniotomy hypertension independently            | √ |   |  |  |
| 12.2. By the end of neurocritical care training, the trainee should be able to manage postcraniotomy pain independently                    | √ |   |  |  |
| 12.3. By the end of neurocritical care training, the trainee should be able to manage wound cerebrospinal fluid (CSF) leaks independently  | √ |   |  |  |
| 12.4. By the end of neurocritical care training, the trainee should be able to manage wound infections independently                       | √ |   |  |  |
| 12.5. By the end of neurocritical care training, the trainee should be able to manage postoperative brain edema independently              | √ | √ |  |  |
| 12.6. By the end of neurocritical care training, the trainee should be able to manage postcraniotomy intracranial hemorrhage independently | √ |   |  |  |
| 12.7. By the end of neurocritical care training, the trainee should be able to assess                                                      | √ |   |  |  |

1  
2  
3  
4  
5  
6  
7  
8  
9  
10  
11  
12  
13  
14  
15  
16  
17  
18  
19  
20  
21  
22  
23  
24  
25  
26  
27  
28  
29  
30  
31  
32  
33  
34  
35  
36  
37  
38  
39  
40  
41  
42  
43  
44  
45  
46

|                                                                                                                                                                                                     |   |  |   |   |
|-----------------------------------------------------------------------------------------------------------------------------------------------------------------------------------------------------|---|--|---|---|
| and manage postcervical spine surgery airway independently                                                                                                                                          |   |  |   |   |
| 12.8. By the end of neurocritical care training, the trainee should be able to assess and manage highrisk postoperative neurosurgical patient independently                                         | √ |  | √ | √ |
| 13. By the end of neurocritical care training, the trainee should be able to conduct neurorehabilitation independently                                                                              | √ |  |   |   |
| <b>B. General medical disease states</b>                                                                                                                                                            |   |  |   |   |
| <b>1. Cardiovascular</b>                                                                                                                                                                            |   |  |   |   |
| 1.1. By the end of neurocritical care training, the trainee should be able to recognize and manage different types of shock independently                                                           | √ |  | √ | √ |
| 1.2. By the end of neurocritical care training, the trainee should be able to recognize and manage myocardial infarction and unstable coronary syndromes independently                              | √ |  |   | √ |
| 1.3. By the end of neurocritical care training, the trainee should be able to recognize and manage neurogenic cardiac disturbances (electrocardiographic changes, stunned myocardium) independently | √ |  |   |   |
| 1.4. By the end of neurocritical care training, the trainee should be able to assess and manage lifethreatening arrhythmia independently                                                            | √ |  | √ | √ |
| 1.5. By the end of neurocritical care training, the trainee should be able to recognize                                                                                                             | √ |  |   | √ |



|                                                                                                                                                                            |   |   |   |   |
|----------------------------------------------------------------------------------------------------------------------------------------------------------------------------|---|---|---|---|
| and manage left ventricular failure and/or acute pulmonary edema independently                                                                                             |   |   |   |   |
| 1.6. By the end of neurocritical care training, the trainee should be able to recognize and manage neurogenic pulmonary edema independently                                | √ |   |   |   |
| 1.7. By the end of neurocritical care training, the trainee should be able to manage hypertension crisis independently                                                     | √ |   |   | √ |
| 1.8. By the end of neurocritical care training, the trainee should be able to perform and interpret cardiac output and hemodynamic monitor independently                   | √ | √ | √ | √ |
| 1.9. By the end of neurocritical care training, the trainee should be able to perform electrocardiography and interpret the results independently                          |   |   | √ | √ |
| <b>2. Respiratory</b>                                                                                                                                                      |   |   |   |   |
| 2.1. By the end of neurocritical care training, the trainee should be able to assess and manage acute and chronic respiratory failure (type I and type II) independently   | √ |   |   | √ |
| 2.2. By the end of neurocritical care training, the trainee should be able to manage chronic obstructive pulmonary disease (COPD) and status asthmaticus under supervision | √ |   |   | √ |
| 2.3. By the end of neurocritical care training, the trainee should be able to recognize (diagnosis and grading) and manage acute respiratory distress syndrome (ARDS)      | √ |   | √ | √ |

1  
2  
3  
4  
5  
6  
7  
8  
9  
10  
11  
12  
13  
14  
15  
16  
17  
18  
19  
20  
21  
22  
23  
24  
25  
26  
27  
28  
29  
30  
31  
32  
33  
34  
35  
36  
37  
38  
39  
40  
41  
42  
43  
44  
45  
46

|                                                                                                                                                                                                                 |   |  |   |   |
|-----------------------------------------------------------------------------------------------------------------------------------------------------------------------------------------------------------------|---|--|---|---|
| independently                                                                                                                                                                                                   |   |  |   |   |
| 2.4. By the end of neurocritical care training, the trainee should be able to manage aspiration independently                                                                                                   | √ |  |   |   |
| 2.5. By the end of neurocritical care training, the trainee should be able to recognize and manage upper airway obstruction independently                                                                       | √ |  |   | √ |
| 2.6. By the end of neurocritical care training, the trainee should be able to recognize and manage bronchopulmonary infections independently                                                                    | √ |  |   |   |
| 2.7. By the end of neurocritical care training, the trainee should be able to recognize and manage pleural diseases (empyema, effusion, pneumothorax) independently                                             | √ |  |   | √ |
| 2.8. By the end of neurocritical care training, the trainee should be able to recognize and manage neurogenic breathing patterns (central hyperventilation, CheyneStokes respirations, et cetera) independently | √ |  |   |   |
| 2.9. By the end of neurocritical care training, the trainee should be able to assess and manage thromboembolic disease (including pulmonary embolism) under supervision independently                           |   |  |   | √ |
| 2.10. By the end of neurocritical care training, the trainee should be able to interpret chest radiographs independently                                                                                        | √ |  | √ | √ |

|                                                                                                                                                                                                       |   |   |   |   |
|-------------------------------------------------------------------------------------------------------------------------------------------------------------------------------------------------------|---|---|---|---|
| 2.11. By the end of neurocritical care training, the trainee should be able to interpret chest CT image independently                                                                                 |   |   |   | √ |
| 2.12. By the end of neurocritical care training, the trainee should be able to perform and interpret end tidal CO <sub>2</sub> monitoring independently                                               | √ |   |   |   |
| 2.13. By the end of neurocritical care training, the trainee should be able to perform and interpret arterial blood gas analysis independently                                                        |   |   | √ | √ |
| 2.14. By the end of neurocritical care training, the trainee should be able to manage noninvasive and invasive mechanical ventilation independently (indication, rational, complication, and weaning) | √ | √ | √ | √ |
| <b>3. Renal</b>                                                                                                                                                                                       |   |   |   |   |
| 3.1. By the end of neurocritical care training, the trainee should be able to assess and manage fluid, electrolytes disorders independently                                                           | √ |   | √ | √ |
| 3.2. By the end of neurocritical care training, the trainee should be able to recognize (diagnosis and grading) and manage acute kidney injury independently                                          | √ |   | √ | √ |
| 3.3. By the end of neurocritical care training, the trainee should be able to recognize and manage derangements secondary to alterations in osmolality and electrolytes independently                 | √ |   |   |   |

|                                                                                                                                                                                  |   |   |  |   |
|----------------------------------------------------------------------------------------------------------------------------------------------------------------------------------|---|---|--|---|
| 3.4. By the end of neurocritical care training, the trainee should be able to manage acidbase disorders independently                                                            | √ | √ |  | √ |
| 3.5. By the end of neurocritical care training, the trainee should be able to manage oliguria and polyuria independently                                                         | √ |   |  |   |
| 3.6. By the end of neurocritical care training, the trainee should be able to manage rhabdomyolysis under supervision                                                            | √ |   |  |   |
| 3.7. By the end of neurocritical care training, the trainee should be able to conduct drug dose adjustment in renal failure independently                                        | √ |   |  | √ |
| 3.8. By the end of neurocritical care training, the trainee should be able to manage cerebral salt wasting independently                                                         | √ |   |  |   |
| 3.9. By the end of neurocritical care training, the trainee should be able to manage syndrome of inappropriate antidiuretic hormone (SAIDH) independently                        | √ |   |  |   |
| <b>4. Metabolic and endocrine effects of critical illness</b>                                                                                                                    |   |   |  |   |
| 4.1. By the end of neurocritical care training, the trainee should be able to manage diabetes mellitus (ketotic and hyperglycemic hyperosmolar coma, hypoglycemia) independently | √ |   |  | √ |
| 4.2. By the end of neurocritical care training, the trainee should be able to manage                                                                                             | √ |   |  |   |

|                                                                                                                                                                                 |   |   |   |   |
|---------------------------------------------------------------------------------------------------------------------------------------------------------------------------------|---|---|---|---|
| systemic inflammatory response syndrome (SIRS) independently                                                                                                                    |   |   |   |   |
| 4.3. By the end of neurocritical care training, the trainee should be able to perform enteral/ parenteral nutritional support independently                                     | √ | √ | √ | √ |
| 4.4. By the end of neurocritical care training, the trainee should be able to manage pituitary crisis under supervision                                                         |   |   |   |   |
| <b>5. Infectious Disease</b>                                                                                                                                                    |   |   |   |   |
| 5.1. By the end of neurocritical care training, the trainee should be able to comply with infection control measures independently                                              | √ |   | √ | √ |
| 5.2. By the end of neurocritical care training, the trainee should be able to perform antimicrobial agent selection and determine dose in critically ill patients independently | √ |   | √ | √ |
| 5.3. By the end of neurocritical care training, the trainee should be able to manage hospital acquired and opportunistic infections in the critically ill patient independently | √ | √ |   | √ |
| 5.4. By the end of neurocritical care training, the trainee should be able to assess and manage fever in critically ill patient independently                                   | √ |   |   | √ |
| 5.5. By the end of neurocritical care training, the trainee should be able to conduct                                                                                           | √ |   |   | √ |

|    |                                                                                         |   |   |   |   |
|----|-----------------------------------------------------------------------------------------|---|---|---|---|
| 1  | interpretation of antibiotic concentrations and sensitivities independently             |   |   |   |   |
| 2  |                                                                                         |   |   |   |   |
| 3  |                                                                                         |   |   |   |   |
| 4  |                                                                                         |   |   |   |   |
| 5  | 5.6. By the end of neurocritical care training, the trainee should be able to recognize |   |   |   |   |
| 6  | and manage sepsis, severe sepsis, and septic shock independently                        |   |   | √ | √ |
| 7  |                                                                                         |   |   |   |   |
| 8  | 5.7. By the end of neurocritical care training, the trainee should be able to recognize |   |   |   |   |
| 9  | and manage multidrug resistance bacteria infection independently                        |   |   |   |   |
| 10 |                                                                                         |   |   |   |   |
| 11 | 5.8. By the end of neurocritical care training, the trainee should be able to perform   |   |   |   |   |
| 12 | antimicrobial agent selection in neurological infections independently                  |   |   |   |   |
| 13 |                                                                                         |   |   |   |   |
| 14 |                                                                                         |   |   |   |   |
| 15 |                                                                                         |   |   |   |   |
| 16 |                                                                                         |   |   |   |   |
| 17 |                                                                                         |   |   |   |   |
| 18 | <b>6. Acute hematologic disorders</b>                                                   |   |   |   |   |
| 19 |                                                                                         |   |   |   |   |
| 20 | 6.1. By the end of neurocritical care training, the trainee should be able to manage    |   |   |   |   |
| 21 | disseminated intravascular coagulation under supervision                                | √ |   |   | √ |
| 22 |                                                                                         |   |   |   |   |
| 23 | 6.2. By the end of neurocritical care training, the trainee should be able to conduct   |   |   |   |   |
| 24 | anticoagulation and fibrinolytic therapy independently                                  | √ | √ |   | √ |
| 25 |                                                                                         |   |   |   |   |
| 26 | 6.3. By the end of neurocritical care training, the trainee should be able to conduct   |   |   |   |   |
| 27 | blood component therapy independently                                                   | √ |   | √ | √ |
| 28 |                                                                                         |   |   |   |   |
| 29 | 6.4. By the end of neurocritical care training, the trainee should be able to conduct   |   |   |   |   |
| 30 | hemostatic therapy independently                                                        | √ |   |   |   |
| 31 |                                                                                         |   |   |   |   |
| 32 | 6.5. By the end of neurocritical care training, the trainee should be able to recognize |   |   |   |   |
| 33 |                                                                                         | √ |   |   |   |
| 34 |                                                                                         |   |   |   |   |
| 35 |                                                                                         |   |   |   |   |
| 36 |                                                                                         |   |   |   |   |
| 37 |                                                                                         |   |   |   |   |
| 38 |                                                                                         |   |   |   |   |
| 39 |                                                                                         |   |   |   |   |
| 40 |                                                                                         |   |   |   |   |
| 41 |                                                                                         |   |   |   |   |
| 42 |                                                                                         |   |   |   |   |
| 43 |                                                                                         |   |   |   |   |
| 44 |                                                                                         |   |   |   |   |
| 45 |                                                                                         |   |   |   |   |
| 46 |                                                                                         |   |   |   |   |

|                                                                                                                                                                                                                               |   |   |   |   |
|-------------------------------------------------------------------------------------------------------------------------------------------------------------------------------------------------------------------------------|---|---|---|---|
| and manage hypercoagulable states under supervision                                                                                                                                                                           |   |   |   |   |
| 6.6. By the end of neurocritical care training, the trainee should be able to recognize and manage traumatic coagulopathy independently                                                                                       |   |   |   | √ |
| <b>7. Acute gastrointestinal and genitourinary disorders</b>                                                                                                                                                                  |   |   |   |   |
| 7.1. By the end of neurocritical care training, the trainee should be able to assess and manage gastrointestinal bleeding independently                                                                                       | √ |   |   | √ |
| 7.2. By the end of neurocritical care training, the trainee should be able to prescribe stress ulcer prophylaxis independently                                                                                                |   |   |   | √ |
| 7.3. By the end of neurocritical care training, the trainee should be able to assess and manage abdominal compartment syndrome independently                                                                                  | √ |   |   | √ |
| <b>8. Immunology and transplantation</b>                                                                                                                                                                                      |   |   |   |   |
| 8.1. By the end of neurocritical care training, the trainee should be able to interpret principles of transplantation (brain death, organ donation, procurement, maintenance of organ donors, implantation) under supervision | √ | √ | √ |   |
| <b>9. General trauma and burns</b>                                                                                                                                                                                            |   |   |   |   |
| 9.1. By the end of neurocritical care training, the trainee should be able to assess and provide initial management of the trauma patient independently                                                                       | √ |   | √ | √ |

|                                                                                                                                       |   |  |   |   |
|---------------------------------------------------------------------------------------------------------------------------------------|---|--|---|---|
| 9.2. By the end of neurocritical care training, the trainee should be able to manage spine and pelvis trauma independently            | √ |  |   |   |
| 9.3. By the end of neurocritical care training, the trainee should be able to manage chest and abdominal trauma independently         | √ |  |   |   |
| 9.4. By the end of neurocritical care training, the trainee should be able to manage crush syndrome independently                     |   |  |   |   |
| 9.5. By the end of neurocritical care training, the trainee should be able to describe burns and electrical injury independently      | √ |  | √ |   |
| <b>10. Transport</b>                                                                                                                  |   |  |   |   |
| 10.1 By the end of neurocritical care training, the trainee should be able to teach of supervises patient assessment before transport |   |  | √ | √ |
| 10.2. By the end of neurocritical care training, the trainee should be able to prepare equipment for transport independently          |   |  |   | √ |
| 10.3. By the end of neurocritical care training, the trainee should be able to perform intrahospital transport independently          |   |  |   | √ |
| <b>11. Others</b>                                                                                                                     |   |  |   |   |
| 11.1. By the end of neurocritical care training, the trainee should be able to assess                                                 |   |  |   | √ |



|                                                                                                                                                                        |   |  |  |   |
|------------------------------------------------------------------------------------------------------------------------------------------------------------------------|---|--|--|---|
| and manage multiorgan dysfunction syndrome independently                                                                                                               |   |  |  |   |
| 11.2. By the end of neurocritical care training, the trainee should be able to manage ICU acquired weakness under supervision                                          |   |  |  |   |
| <b>C. Critical care monitoring practical procedures</b>                                                                                                                |   |  |  |   |
| <b>1. Monitoring</b>                                                                                                                                                   |   |  |  |   |
| 1.1. By the end of neurocritical care training, the trainee should be able to perform neuromonitoring independently                                                    | √ |  |  |   |
| 1.2. By the end of neurocritical care training, the trainee should be able to interpret principles of ECG monitoring independently                                     | √ |  |  |   |
| 1.3. By the end of neurocritical care training, the trainee should be able to perform and interpret invasive hemodynamic monitor independently                         | √ |  |  | √ |
| 1.4. By the end of neurocritical care training, the trainee should be able to perform and interpret noninvasive hemodynamic monitor independently                      | √ |  |  | √ |
| 1.5. By the end of neurocritical care training, the trainee should be able to perform and interpret respiratory mechanics monitor under supervision                    | √ |  |  | √ |
| 1.6. By the end of neurocritical care training, the trainee should be able to perform and interpret metabolic monitoring under supervision (oxygen consumption, carbon | √ |  |  |   |

1  
2  
3  
4  
5  
6  
7  
8  
9  
10  
11  
12  
13  
14  
15  
16  
17  
18  
19  
20  
21  
22  
23  
24  
25  
26  
27  
28  
29  
30  
31  
32  
33  
34  
35  
36  
37  
38  
39  
40  
41  
42  
43  
44  
45  
46

|                                                                                                                                                                                                                                                      |   |   |   |   |
|------------------------------------------------------------------------------------------------------------------------------------------------------------------------------------------------------------------------------------------------------|---|---|---|---|
| dioxide production, respiratory quotient)                                                                                                                                                                                                            |   |   |   |   |
| 1.7. By the end of neurocritical care training, the trainee should be able to conduct multimodality monitoring in NICU independently                                                                                                                 | √ |   |   |   |
| <b>2. General critical care practical procedures and therapeutic interventions</b>                                                                                                                                                                   |   |   |   |   |
| 2.1. By the end of neurocritical care training, the trainee should be able to perform arterial catheterisation independently                                                                                                                         | √ | √ | √ | √ |
| 2.2. By the end of neurocritical care training, the trainee should be able to teach or supervise others central venous catheter insertion                                                                                                            | √ | √ | √ | √ |
| 2.3. By the end of neurocritical care training, the trainee should be able to conduct vasoactive/inotropic medication therapy independently                                                                                                          | √ |   | √ | √ |
| 2.4. By the end of neurocritical care training, the trainee should be able to teach or supervise others to perform cardiopulmonary resuscitation, postresuscitation brain protection, to provide advanced life support for postresuscitation patient | √ |   | √ | √ |
| 2.5. By the end of neurocritical care training, the trainee should be able to teach or supervise others to perform cardioversion and defibrillation                                                                                                  |   |   | √ | √ |
| 2.6. By the end of neurocritical care training, the trainee should be able to perform airway maintenance and ventilation in nonintubated/unconscious patients                                                                                        | √ | √ | √ | √ |

|                                                                                                                                                                                      |   |   |   |   |
|--------------------------------------------------------------------------------------------------------------------------------------------------------------------------------------|---|---|---|---|
| independently                                                                                                                                                                        |   |   |   |   |
| 2.7. By the end of neurocritical care training, the trainee should be able to perform tracheal intubation independently                                                              | √ | √ |   | √ |
| 2.8. By the end of neurocritical care training, the trainee should be able to perform difficult and failed airway management independently                                           |   |   | √ |   |
| 2.9. By the end of neurocritical care training, the trainee should be able to perform and interpret intraabdominal pressure monitor independently                                    |   |   |   | √ |
| 2.10. By the end of neurocritical care training, the trainee should be able to teach or supervise others to perform tracheal aspiration                                              |   |   | √ | √ |
| 2.11. By the end of neurocritical care training, the trainee should be able to teach or supervise others to perform oxygen therapy                                                   |   |   | √ | √ |
| 2.12. By the end of neurocritical care training, the trainee should be able to perform fiberoptic bronchoscopy and bronchoalveolar lavage in the intubated patient under supervision | √ |   | √ |   |
| 2.13. By the end of neurocritical care training, the trainee should be able to explain and perform recruitment maneuver: principle and practice under supervision                    |   |   |   | √ |
| 2.14. By the end of neurocritical care training, the trainee should be able to perform                                                                                               | √ |   | √ | √ |

|                                                                                                                                                                      |   |   |   |   |
|----------------------------------------------------------------------------------------------------------------------------------------------------------------------|---|---|---|---|
| thoracocentesis via a chest drain independently                                                                                                                      |   |   |   |   |
| 2.15. By the end of neurocritical care training, the trainee should be able to perform percutaneous tracheostomy independently                                       | √ |   | √ |   |
| 2.16. By the end of neurocritical care training, the trainee should be able to perform bedside ultrasound to localize pleural effusion and ascites under supervision |   |   |   | √ |
| 2.17. By the end of neurocritical care training, the trainee should be able to assess inferior caval vein by ultrasound under supervision                            |   |   |   |   |
| 2.18. By the end of neurocritical care training, the trainee should be able to perform ultrasound techniques for vascular localisation independently                 |   |   | √ |   |
| 2.19. By the end of neurocritical care training, the trainee should be able to perform thyrocricocentesis under supervision                                          |   |   |   |   |
| <b>3. Neurocritical care practical procedures and therapeutic interventions</b>                                                                                      |   |   |   |   |
| 3.1. By the end of neurocritical care training, the trainee should be able to perform lumbar puncture independently                                                  | √ | √ | √ | √ |
| 3.2. By the end of neurocritical care training, the trainee should be able to perform shunt and ventricular drain tap for CSF sampling independently                 | √ |   |   |   |
| 3.3. By the end of neurocritical care training, the trainee should be able to manage                                                                                 | √ |   |   |   |

|                                                                                                                                                                                                                                                     |   |   |   |   |
|-----------------------------------------------------------------------------------------------------------------------------------------------------------------------------------------------------------------------------------------------------|---|---|---|---|
| external ventricular drains independently                                                                                                                                                                                                           |   |   |   |   |
| 3.4. By the end of neurocritical care training, the trainee should be able to assess and manage pain of neurocritical care patients independently                                                                                                   | √ | √ | √ | √ |
| 3.5. By the end of neurocritical care training, the trainee should be able to assess sedation and describe principle it independently                                                                                                               | √ | √ |   | √ |
| 3.6. By the end of neurocritical care training, the trainee should be able to interpret and manage of ICP and cerebral perfusion pressure data independently                                                                                        | √ | √ |   |   |
| 3.7. By the end of neurocritical care training, the trainee should be able to interpret saturation and jugular venous oxygenation and brain tissue oxygen data under supervision                                                                    | √ |   |   |   |
| 3.8. By the end of neurocritical care training, the trainee should be able to perform systemic moderate hypothermia under supervision                                                                                                               | √ |   |   |   |
| 3.9. By the end of neurocritical care training, the trainee should be able to manage fluid and conduct osmotic dehydration treatment independently                                                                                                  |   |   |   |   |
| 3.10. By the end of neurocritical care training, the trainee should be able to perform and interpret cerebral multimodality monitoring (pH, partial pressure of carbon dioxide [pCO <sub>2</sub> ], laser Doppler, microdialysis) under supervision | √ | √ |   |   |

|                                                                                                                                                                                                                                                                 |   |   |   |   |
|-----------------------------------------------------------------------------------------------------------------------------------------------------------------------------------------------------------------------------------------------------------------|---|---|---|---|
| 3.11. By the end of neurocritical care training, the trainee should be able to perform lumbar drain insertion independently                                                                                                                                     | √ |   |   |   |
| 3.12. By the end of neurocritical care training, the trainee should be able to manage and insert ICP monitoring independently                                                                                                                                   | √ | √ |   |   |
| 3.13. By the end of neurocritical care training, the trainee should be able to manage cerebral oximetric or perfusion monitoring under supervision                                                                                                              | √ | √ |   |   |
| 3.14. By the end of neurocritical care training, the trainee should be able to perform brain ventricle puncture under supervision                                                                                                                               |   |   |   |   |
| 3.15. By the end of neurocritical care training, the trainee should be able to interpret CT/MRI of nervous system under supervision                                                                                                                             | √ |   |   |   |
| 3.16. By the end of neurocritical care training, the trainee should be able to choose neuromuscular blockade and describe indication of it under supervision                                                                                                    |   |   | √ | √ |
| <b>D. Professionalism and system management</b>                                                                                                                                                                                                                 |   |   |   |   |
| 1. By the end of neurocritical care training, the trainee should be able to gather accurate, essential information from all sources, including medical interviews, physical examinations, medical records and Laboratory and radiological results independently | √ |   | √ | √ |

|                                                                                                                                                                                                                                      |   |   |   |   |
|--------------------------------------------------------------------------------------------------------------------------------------------------------------------------------------------------------------------------------------|---|---|---|---|
| 2. By the end of neurocritical care training, the trainee should be able to integrate clinical findings with laboratory investigations to form a differential diagnosis independently                                                | √ |   | √ | √ |
| 3. By the end of neurocritical care training, the trainee should be able to involve patients (or their surrogates if applicable) in decisions about care and treatment (including informed consent and endoflife care) independently | √ | √ | √ | √ |
| 4. By the end of neurocritical care training, the trainee should be able to promote collaborative practice independently, including multidisciplinary cooperation and effective team working                                         | √ |   | √ |   |
| 5. By the end of neurocritical care training, the trainee should be able to ensure continuity of care through effective handover of clinical information independently                                                               |   |   | √ | √ |
| 6. By the end of neurocritical care training, the trainee should be able to describe implications of chronic and comorbid disease in the acutely ill patient independently                                                           |   |   | √ | √ |
| 7. By the end of neurocritical care training, the trainee should be able to seek learning opportunities and integrate new knowledge into clinical practice independently                                                             | √ |   | √ | √ |
| 8. By the end of neurocritical care training, the trainee should be able to apply knowledge to clinical problem solving, clinical decision making, and critical thinking                                                             | √ |   | √ |   |

1  
2  
3  
4  
5  
6  
7  
8  
9  
10  
11  
12  
13  
14  
15  
16  
17  
18  
19  
20  
21  
22  
23  
24  
25  
26  
27  
28  
29  
30  
31  
32  
33  
34  
35  
36  
37  
38  
39  
40  
41  
42  
43  
44  
45  
46

|                                                                                                                                                                                                                               |   |  |   |   |
|-------------------------------------------------------------------------------------------------------------------------------------------------------------------------------------------------------------------------------|---|--|---|---|
| independently.                                                                                                                                                                                                                |   |  |   |   |
| 9. By the end of neurocritical care training, the trainee should be able to develop a clinically applicable knowledge of the basic and clinical sciences that underlie the practice of neurointensive care                    | √ |  |   |   |
| 10. By the end of neurocritical care training, the trainee should be able to provide effective and professional consultation to physicians and health care professionals of other specialty independently                     | √ |  |   |   |
| 11. By the end of neurocritical care training, the trainee should be able to maintain accurate medical records and documentation independently                                                                                | √ |  | √ | √ |
| 12. By the end of neurocritical care training, the trainee should be able to communicate the continuing care requirements of patients at ICU discharge to health care professionals, patients and relatives under supervision |   |  | √ |   |
| 13. By the end of neurocritical care training, the trainee should be able to manage the safe and timely discharge of patients from ICU independently                                                                          |   |  | √ | √ |
| 14. By the end of neurocritical care training, the trainee should be able to identify and minimise risk of critical incidents and adverse events independently                                                                |   |  | √ | √ |
| 15. By the end of neurocritical care training, the trainee should be able to recognize                                                                                                                                        | √ |  |   |   |



|                                                                                                                                                                                                                                                                            |   |   |   |   |
|----------------------------------------------------------------------------------------------------------------------------------------------------------------------------------------------------------------------------------------------------------------------------|---|---|---|---|
| and identifies deficiencies in peer performance independently                                                                                                                                                                                                              |   |   |   |   |
| 16. By the end of neurocritical care training, the trainee should be able to identify environmental hazards and promote safety for patients and staff independently                                                                                                        |   |   | √ | √ |
| 17. By the end of neurocritical care training, the trainee should be able to communicate effectively with patients, relatives and members of the healthcare team independently                                                                                             | √ |   | √ | √ |
| 18. By the end of neurocritical care training, the trainee should be able to respect privacy, dignity, confidentiality, and legal constraints on the use of patient data                                                                                                   | √ |   | √ | √ |
| 19. By the end of neurocritical care training, the trainee should be able to demonstrate sensitivity and responsiveness to gender, age, culture, religion, sexual preference, socioeconomic status, beliefs, behaviors and an awareness of their impact on decision making | √ |   | √ |   |
| 20. By the end of neurocritical care training, the trainee should be able to demonstrate respect, compassion, integrity, and altruism in relationships with patients, families, and colleagues                                                                             | √ |   |   |   |
| <b>E. Ethical and legal aspects of critical care medicine</b>                                                                                                                                                                                                              |   |   |   |   |
| 1. By the end of neurocritical care training, the trainee should be able to evaluate                                                                                                                                                                                       | √ | √ | √ |   |

1  
2  
3  
4  
5  
6  
7  
8  
9  
10  
11  
12  
13  
14  
15  
16  
17  
18  
19  
20  
21  
22  
23  
24  
25  
26  
27  
28  
29  
30  
31  
32  
33  
34  
35  
36  
37  
38  
39  
40  
41  
42  
43  
44  
45  
46

|                                                                                                                                                                                                                                 |   |  |   |   |
|---------------------------------------------------------------------------------------------------------------------------------------------------------------------------------------------------------------------------------|---|--|---|---|
| death and dying, and perform brainstem death testing under supervision                                                                                                                                                          |   |  |   |   |
| 2. By the end of neurocritical care training, the trainee should be able to manage palliative care of the critically ill patient, forgo lifesustaining treatment and order not to resuscitate under supervision                 | √ |  | √ |   |
| 3. By the end of neurocritical care training, the trainee should be able to apply and describe practice to minimizes the physical and psychosocial consequences of critical illness for patients and families under supervision |   |  | √ | √ |
| 4. By the end of neurocritical care training, the trainee should be able to formulate clinical decisions with respect for ethical and legal principles independently                                                            | √ |  | √ | √ |
| 5. By the end of neurocritical care training, the trainee should be able to adhere to principles of confidentiality, scientific/academic integrity, and informed consent independently                                          | √ |  |   |   |
| <b>F. Principles of research and certification</b>                                                                                                                                                                              |   |  |   |   |
| 1. By the end of neurocritical care training, the trainee should be able to perform presentation independently                                                                                                                  | √ |  |   |   |
| 2. Certification                                                                                                                                                                                                                |   |  |   |   |
| 2.1 By the end of neurocritical care training, the trainee should acquire the                                                                                                                                                   |   |  |   | √ |

|                                                                                                                                                                                      |  |  |  |   |
|--------------------------------------------------------------------------------------------------------------------------------------------------------------------------------------|--|--|--|---|
| certification of basic life support                                                                                                                                                  |  |  |  |   |
| 2.2 By the end of neurocritical care training, the trainee should acquire the certification of advanced cardiac life support                                                         |  |  |  | √ |
| <b>G. Scoring systems</b>                                                                                                                                                            |  |  |  |   |
| 1. General status scoring                                                                                                                                                            |  |  |  |   |
| 1.1. By the end of neurocritical care training, the trainee should be able to describe and assess patient with acute physiology and chronic health evaluation II score independently |  |  |  | √ |
| 1.2. By the end of neurocritical care training, the trainee should be able to describe and assess patient with simplified acute physiology score II score independently              |  |  |  | √ |
| 2. Organs scoring                                                                                                                                                                    |  |  |  |   |
| 2.1. By the end of neurocritical care training, the trainee should be able to describe and assess patient with acute kidney injury scoring (KDIGO) independently                     |  |  |  |   |
| 2.2. By the end of neurocritical care training, the trainee should be able to describe and assess patient with sequential organ failure assessment score independently               |  |  |  | √ |
| 3. Sedation, pain and delirium scoring                                                                                                                                               |  |  |  |   |
| 3.1. By the end of neurocritical care training, the trainee should be able to teach and                                                                                              |  |  |  |   |

1  
2  
3  
4  
5  
6  
7  
8  
9  
10  
11  
12  
13  
14  
15  
16  
17  
18  
19  
20  
21  
22  
23  
24  
25  
26  
27  
28  
29  
30  
31  
32  
33  
34  
35  
36  
37  
38  
39  
40  
41  
42  
43  
44  
45  
46

|                                                                                                                                                                                                       |  |  |  |  |
|-------------------------------------------------------------------------------------------------------------------------------------------------------------------------------------------------------|--|--|--|--|
| supervise others to perform CriticalCare Pain Observation Tool independently                                                                                                                          |  |  |  |  |
| 3.2. By the end of neurocritical care training, the trainee should be able to describe and assess patient with Richmond AgitationSedation Scale independently                                         |  |  |  |  |
| 3.3. By the end of neurocritical care training, the trainee should be able to describe and assess patient with the confusion assessment method for the diagnosis of delirium in the ICU independently |  |  |  |  |
| 3.4. By the end of neurocritical care training, the trainee should be able to describe and assess patient with selfrating anxiety scale independently                                                 |  |  |  |  |
| 4. Neural system scoring                                                                                                                                                                              |  |  |  |  |
| 4.1 By the end of neurocritical care training, the trainee should be able to teach and supervise others to perform Glasgow Coma Scale                                                                 |  |  |  |  |
| 4.2 By the end of neurocritical care training, the trainee should be able to describe and assess patient with National Institute of Health Stroke Scale independently                                 |  |  |  |  |

**UCNS:** United Council for Neurologic Subspecialties, **AAN:** American Academy of Neurology, **CCICCM:** Chinese College of Intensive and Critical Care Medicine, **CoBaTrICE:** Competencybased Training Programme in ICM for Europe

STROBE Statement—Checklist of items that should be included in reports of *cross-sectional studies*

|                              | Item No | Recommendation                                                                                                                                                                                    | Page number       |
|------------------------------|---------|---------------------------------------------------------------------------------------------------------------------------------------------------------------------------------------------------|-------------------|
| <b>Title and abstract</b>    | 1       | (a) Indicate the study's design with a commonly used term in the title or the abstract                                                                                                            | 1-2               |
|                              |         | (b) Provide in the abstract an informative and balanced summary of what was done and what was found                                                                                               | 2                 |
| <b>Introduction</b>          |         |                                                                                                                                                                                                   |                   |
| Background/rationale         | 2       | Explain the scientific background and rationale for the investigation being reported                                                                                                              | 4                 |
| Objectives                   | 3       | State specific objectives, including any prespecified hypotheses                                                                                                                                  | 4                 |
| <b>Methods</b>               |         |                                                                                                                                                                                                   |                   |
| Study design                 | 4       | Present key elements of study design early in the paper                                                                                                                                           | 5                 |
| Setting                      | 5       | Describe the setting, locations, and relevant dates, including periods of recruitment, exposure, follow-up, and data collection                                                                   | 5&6               |
| Participants                 | 6       | (a) Give the eligibility criteria, and the sources and methods of selection of participants                                                                                                       | 5&6               |
| Variables                    | 7       | Clearly define all outcomes, exposures, predictors, potential confounders, and effect modifiers. Give diagnostic criteria, if applicable                                                          | Online appendix 1 |
| Data sources/<br>measurement | 8*      | For each variable of interest, give sources of data and details of methods of assessment (measurement). Describe comparability of assessment methods if there is more than one group              | 7-8               |
| Bias                         | 9       | Describe any efforts to address potential sources of bias                                                                                                                                         | 7                 |
| Study size                   | 10      | Explain how the study size was arrived at                                                                                                                                                         | 7                 |
| Quantitative<br>variables    | 11      | Explain how quantitative variables were handled in the analyses. If applicable, describe which groupings were chosen and why                                                                      | 8                 |
| Statistical methods          | 12      | (a) Describe all statistical methods, including those used to control for confounding                                                                                                             | 8                 |
|                              |         | (b) Describe any methods used to examine subgroups and interactions                                                                                                                               | 8                 |
|                              |         | (c) Explain how missing data were addressed                                                                                                                                                       | 8                 |
|                              |         | (d) If applicable, describe analytical methods taking account of sampling strategy                                                                                                                | 8                 |
|                              |         | (e) Describe any sensitivity analyses                                                                                                                                                             | 8                 |
| <b>Results</b>               |         |                                                                                                                                                                                                   |                   |
| Participants                 | 13*     | (a) Report numbers of individuals at each stage of study—eg numbers potentially eligible, examined for eligibility, confirmed eligible, included in the study, completing follow-up, and analysed | 9                 |
|                              |         | (b) Give reasons for non-participation at each stage                                                                                                                                              | 9                 |
|                              |         | (c) Consider use of a flow diagram                                                                                                                                                                | Figure 1          |

|    |                          |     |                                                                                                                                       |       |
|----|--------------------------|-----|---------------------------------------------------------------------------------------------------------------------------------------|-------|
| 1  |                          |     |                                                                                                                                       |       |
| 2  | Descriptive data         | 14* | (a) Give characteristics of study participants (eg demographic, clinical, social) and information on exposures and potential          |       |
| 3  |                          |     | confounders                                                                                                                           | 9     |
| 4  |                          |     | (b) Indicate number of participants with missing data for each variable of interest                                                   | 9     |
| 5  | Outcome data             | 15* | Report numbers of outcome events or summary measures                                                                                  | 9-10  |
| 6  | Main results             | 16  | (a) Give unadjusted estimates and, if applicable, confounder-adjusted estimates and their precision (eg, 95% confidence interval).    |       |
| 7  |                          |     | Make clear which confounders were adjusted for and why they were included                                                             | NA    |
| 8  |                          |     | (b) Report category boundaries when continuous variables were categorized                                                             | NA    |
| 9  |                          |     | (c) If relevant, consider translating estimates of relative risk into absolute risk for a meaningful time period                      | NA    |
| 10 | Other analyses           | 17  | Report other analyses done—eg analyses of subgroups and interactions, and sensitivity analyses                                        | 9-10  |
| 11 | <b>Discussion</b>        |     |                                                                                                                                       |       |
| 12 | Key results              | 18  | Summarise key results with reference to study objectives                                                                              | 11    |
| 13 | Limitations              | 19  | Discuss limitations of the study, taking into account sources of potential bias or imprecision. Discuss both direction and magnitude  |       |
| 14 |                          |     | of any potential bias                                                                                                                 | 13    |
| 15 | Interpretation           | 20  | Give a cautious overall interpretation of results considering objectives, limitations, multiplicity of analyses, results from similar |       |
| 16 |                          |     | studies, and other relevant evidence                                                                                                  | 11-13 |
| 17 | Generalisability         | 21  | Discuss the generalisability (external validity) of the study results                                                                 | 12    |
| 18 | <b>Other information</b> |     |                                                                                                                                       |       |
| 19 | Funding                  | 22  | Give the source of funding and the role of the funders for the present study and, if applicable, for the original study on which the  |       |
| 20 |                          |     | present article is based                                                                                                              | 17    |

\*Give information separately for exposed and unexposed groups.

**Note:** An Explanation and Elaboration article discusses each checklist item and gives methodological background and published examples of transparent reporting. The STROBE checklist is best used in conjunction with this article (freely available on the Web sites of PLoS Medicine at <http://www.plosmedicine.org/>, Annals of Internal Medicine at <http://www.annals.org/>, and Epidemiology at <http://www.epidem.com/>). Information on the STROBE Initiative is available at [www.strobe-statement.org](http://www.strobe-statement.org).
