# Supplementary material for: Core competencies in neurocritical care training in China: consensus developed by a national Delphi consensus survey combined with nominal group technique
Source: PubMed Central journal article supplement — BMJ Open. 2020 Jan 6;10(1):e033441. doi: 10.1136/bmjopen-2019-033441 (PMC6955523; doi:10.1136/bmjopen-2019-033441), 2020-01-06
Supplement: bmjopen-2019-033441supp001.pdf [file bmjopen-2019-033441supp001.pdf]

## **Core competencies in neurocritical care training in China: consensus developed by a national Delphi consensus survey combined with nominal group technique**

Zhen Cui, MD, Liang Gao, MD, Qi-Bing Huang, MD, Li-Hong Li, MD, Bing-Hui Qiu, MD, Guang-Zhi Shi, MD, PhD, Xiang-You Yu, MD, Yan Wang, BS, Li Zhang, RN, Yu-Mei Wang, MD, Linlin Zhang, MD, PhD, Jian-Xin Zhou, MD, PhD, on behalf of the Working Group from Neuro-Critical Care Committee affiliated to the Chinese Association of Critical Care Physicians and the National Center for Healthcare Quality Management in Neurological Diseases.

### **Online Supplementary Appendix 1**

#### Contents

Table S1. The minimum level of expertise at the end of neurocritical care specialist training

Table S2. Constructing a competence statement

Table S3. Accepted items in the core competencies required for neurocritical care specialists and the supporting rate for each item

Table S4. Eliminated items during nominal group meeting

**Table S1. The minimum level of expertise at the end of neurocritical care specialist training**

| Levels | Descriptions                                                                           |
|--------|----------------------------------------------------------------------------------------|
| a      | Has knowledge of (describes) ...                                                       |
| b      | Performs (manages, conducts, demonstrates, assesses, interprets) ... under supervision |
| c      | Performs (manages, conducts, demonstrates, assesses, interprets) ... independently     |
| d      | Teaches or supervises others to perform (manages) ...                                  |

**Table S2. Constructing a competence statement**

|                       |                                                                             |                                                                              |                         |                                                     |
|-----------------------|-----------------------------------------------------------------------------|------------------------------------------------------------------------------|-------------------------|-----------------------------------------------------|
| Context               | By the end of neurocritical care training, the trainee should be able to... |                                                                              |                         |                                                     |
| Level of expertise    | Level "a"                                                                   | Level "b"                                                                    | Level "c"               | Level "d"                                           |
|                       | Has knowledge of (describes)...                                             | Manages...under supervision                                                  | Manages...independently | Teaches or supervises others to perform (manage)... |
|                       | Describes...                                                                | Manages...<br>Conducts...<br>Demonstrates...<br>Assesses...<br>Interprets... |                         | Teaches...<br>Supervises...                         |
| Content of competence | ...different types of shock...                                              |                                                                              |                         |                                                     |

---

|         |                                                                                                                                       |
|---------|---------------------------------------------------------------------------------------------------------------------------------------|
| Example | By the end of neurocritical care training, the trainee should be able to recognize and manage different types of shock independently. |
|---------|---------------------------------------------------------------------------------------------------------------------------------------|

---

Table S3. Accepted items in the core competencies required for neurocritical care specialists and the supporting rate for each item

| Domain                                | Competency statement                     | Online survey (%) | Source*    | Agreement during round 1 to 4 NG rating (%) |         |         |         | Minimum level of expertise identified during round 5 NG meeting ‡ |
|---------------------------------------|------------------------------------------|-------------------|------------|---------------------------------------------|---------|---------|---------|-------------------------------------------------------------------|
|                                       |                                          |                   |            | Round 1                                     | Round 2 | Round 3 | Round 4 |                                                                   |
| A. Neurological disease states        |                                          |                   |            |                                             |         |         |         |                                                                   |
| 1. Cerebrovascular diseases           |                                          |                   |            |                                             |         |         |         |                                                                   |
| 1.1. Manages infarction and ischemia  |                                          |                   |            |                                             |         |         |         |                                                                   |
|                                       | a. Massive hemispheric infarction        | 97.5              | <i>U/A</i> | 100                                         |         |         |         | c                                                                 |
|                                       | b. Basilar artery occlusion and stenosis | 95.2              | <i>U/A</i> | 100                                         |         |         |         | c                                                                 |
|                                       | c. Carotid artery occlusion and stenosis | 95.2              | <i>U/A</i> | 100                                         |         |         |         | c                                                                 |
|                                       | d. Delayed cerebral ischemia             | -                 | <i>O</i>   | 100                                         |         |         |         | c                                                                 |
| 1.2. Manages intracerebral hemorrhage |                                          |                   |            |                                             |         |         |         |                                                                   |
|                                       | a. Supratentorial                        | 94.7              | <i>U/A</i> | 91                                          | 100     |         |         | c                                                                 |
|                                       | b. Cerebellar                            | 97.0              | <i>U/A</i> | 100                                         |         |         |         | c                                                                 |
|                                       | c. Brainstem                             | 97.5              | <i>U/A</i> | 100                                         |         |         |         | c                                                                 |
|                                       | d. Intraventricular                      | 97.0              | <i>U/A</i> | 100                                         |         |         |         | c                                                                 |

|                                                                          |      |              |     |     |   |
|--------------------------------------------------------------------------|------|--------------|-----|-----|---|
| e. Subarachnoid hemorrhage - aneurysmal and others                       | 97.0 | <i>U/A</i>   | 100 |     | c |
| 1.3 Manages arteriovenous malformations                                  | 95.6 | <i>U</i>     | 100 |     | c |
| 1.4 Manages carotid-cavernous fistulae                                   | 80.9 | <i>U</i>     | 100 |     | c |
| 1.5 Manages cervical and cerebral arterial dissections under supervision | 88.3 | <i>U</i>     | 100 |     | b |
| 2. Neurotrauma                                                           |      |              |     |     |   |
| 2.1 Manages traumatic brain injury                                       |      |              |     |     |   |
| a. Axonal shearing injury                                                | 85.8 | <i>U/A</i>   | 91  | 100 | c |
| b. Epidural hematoma                                                     | 96.1 | <i>U/A</i>   | 100 |     | c |
| c. Subdural hematoma                                                     | 96.3 | <i>U/A</i>   | 100 |     | c |
| d. Contusions and lacerations                                            | 95.7 | <i>U/A</i>   | 100 |     | c |
| e. Penetrating craniocerebral injuries                                   | 92.4 | <i>U/A</i>   | 100 |     | c |
| f. Traumatic SAH                                                         | 95.8 | <i>U/A</i>   | 100 |     | c |
| 2.2. Manages spinal cord injury                                          | 95.1 | <i>U/A/C</i> | 100 |     | c |
| 3. Status epilepticus                                                    |      |              |     |     |   |

|                                                                  |      |              |     |     |   |
|------------------------------------------------------------------|------|--------------|-----|-----|---|
| 3.1 Manages convulsive status epilepticus                        | 97.8 | <i>U/A/C</i> | 100 |     | c |
| 3.2 Manages nonconvulsive status epilepticus                     | 89.0 | <i>U/A/C</i> | 100 |     | c |
| 3.3 Manages myoclonic epilepsy                                   | 91.7 | <i>U/A/C</i> | 100 |     | c |
| 4. Neuromuscular diseases                                        |      |              |     |     |   |
| 4.1 Manages myasthenia gravis                                    | 94.5 | <i>U/A</i>   | 100 |     | c |
| 4.2 Manages Guillain-Barré syndrome                              | 88.3 | <i>U/A</i>   | 100 |     | c |
| 5. Infections                                                    |      |              |     |     |   |
| 5.1 Manages encephalitis (viral, bacterial, parasitic)           | 97.5 | <i>U/A/C</i> | 100 |     | c |
| 5.2 Manages meningitis (viral, bacterial, parasitic)             | 98.5 | <i>U/A/C</i> | 100 |     | c |
| 5.3 Manages brain and spinal epidural abscess under supervision  | 93.6 | <i>U/C</i>   | 100 |     | b |
| 6. Toxic-metabolic disorders                                     |      |              |     |     |   |
| 6.1 Manages drug overdose and withdrawal                         | 90.3 | <i>U/C/E</i> | 91  | 100 | c |
| 6.2 Manages temperature-related injuries                         | 93.6 | <i>U</i>     | 91  | 100 | c |
| 6.3 Manages carbon monoxide poisoning and delayed encephalopathy | -    | <i>O</i>     | 73  | 100 | c |

|                                                                                          |      |              |     |     |   |
|------------------------------------------------------------------------------------------|------|--------------|-----|-----|---|
| 7. Inflammatory and demyelinating diseases                                               |      |              |     |     |   |
| 7.1 Manages central pontine myelinolysis                                                 | 78.8 | <i>U</i>     | 73  | 100 | c |
| 7.2 Manages osmotic demyelination syndrome                                               | -    | <i>O</i>     | 64  | 100 | c |
| 8. Encephalopathies                                                                      |      |              |     |     |   |
| 8.1 Manages hepatic encephalopathy                                                       | 91.9 | <i>U</i>     | 100 |     | c |
| 8.2 Manages hypoxic-ischemic encephalopathy                                              | 97.8 | <i>U</i>     | 100 |     | c |
| 8.3 Manages metabolic encephalopathy                                                     | -    | <i>O</i>     | 100 |     | c |
| 8.4 Manages hypertensive encephalopathy and posterior reversible encephalopathy syndrome | 95.3 | <i>U</i>     | 91  | 100 | c |
| 9. Neuroendocrine disorders                                                              |      |              |     |     |   |
| 9.1 Manages pituitary apoplexy                                                           | 94.6 | <i>U</i>     | 100 |     | c |
| 9.2 Manages diabetes insipidus                                                           | 95.5 | <i>U</i>     | 100 |     | c |
| 10. Manages movement disorders (severe dystonia and opisthotonos)                        | 91.6 | <i>U</i>     | 100 |     | c |
| 11. Clinical syndromes                                                                   |      |              |     |     |   |
| 11.1 Teaches or supervises others in the Manages coma                                    | 98.5 | <i>U/A/C</i> | 100 |     | d |



|                                                             |      |              |     |     |   |
|-------------------------------------------------------------|------|--------------|-----|-----|---|
| 11.2 Manages herniation syndromes                           | 98.2 | <i>U/A</i>   | 100 |     | c |
| 11.3 Manages elevated intracranial pressure                 | 97.7 | <i>U/C</i>   | 100 |     | c |
| 11.4 Manages intracranial hypotension/hypovolemia           | 95.9 | <i>U</i>     | 100 |     | c |
| 11.5 Manages hydrocephalus                                  | 95.4 | <i>U/A</i>   | 100 |     | c |
| 11.6 Manages delirium                                       | 98.1 | <i>U/A</i>   | 100 |     | c |
| 12. Manages perioperative neurosurgical care                |      |              |     |     |   |
| 12.1 Manages postcraniotomy hypertension                    | 96.1 | <i>U</i>     | 100 |     | c |
| 12.2 Manages postcraniotomy pain                            | 93.3 | <i>U</i>     | 100 |     | c |
| 12.3 Manages wound cerebrospinal fluid leaks                | 94.8 | <i>U</i>     | 91  | 100 | c |
| 12.4 Manages wound infections                               | 95.6 | <i>U</i>     | 100 |     | c |
| 12.5 Manages postoperative brain edema                      | 96.8 | <i>U/A</i>   | 100 |     | c |
| 12.6 Manages postcraniotomy intracranial hemorrhage         | 96.3 | <i>U</i>     | 100 |     | c |
| 12.7 Assesses and manages postcervical spine surgery airway | 92.1 | <i>U</i>     | 100 |     | c |
| 12.8 Assesses and manages high-risk                         | 96.8 | <i>U/C/E</i> | 100 |     | c |

|                                                                                                               |      |              |     |     |   |
|---------------------------------------------------------------------------------------------------------------|------|--------------|-----|-----|---|
| neurosurgical patient postoperative                                                                           |      |              |     |     |   |
| 13. Conducts neurorehabilitation                                                                              | 88.0 | <i>U</i>     | 73  | 100 | c |
| B. General medical disease states                                                                             |      |              |     |     |   |
| 1. Cardiovascular                                                                                             |      |              |     |     |   |
| 1.1 Recognizes and manages different types of shock                                                           | 96.7 | <i>U/C/E</i> | 100 |     | c |
| 1.2 Recognizes and manages myocardial infarction and unstable coronary syndromes                              | 93.3 | <i>U/C</i>   | 100 |     |   |
| 1.3 Recognizes and manages neurogenic cardiac disturbances (electrocardiographic changes, stunned myocardium) | 93.6 | <i>U</i>     | 100 |     | c |
| 1.4 Assesses and manages life-threatening arrhythmia                                                          | 94.7 | <i>U/C/E</i> | 100 |     | c |
| 1.5. Recognizes and manages left ventricular failure and/or acute pulmonary edema                             | 95.0 | <i>U/C</i>   | 100 |     | c |
| 1.6. Recognizes and manages neurogenic pulmonary edema                                                        | 94.7 | <i>U</i>     | 100 |     | c |
| 1.7 Recognizes and manages hypertension crisis                                                                | 96.2 | <i>U/C</i>   | 100 |     | c |

|                                                                                                    |      |                |     |     |     |   |
|----------------------------------------------------------------------------------------------------|------|----------------|-----|-----|-----|---|
| 1.8 Performs and interprets cardiac output and hemodynamic monitor                                 | 92.3 | <i>U/A/C/E</i> | 100 |     |     | c |
| 1.9 Performs electrocardiography and interprets the results                                        | 94.1 | <i>C/E</i>     | 91  | 100 |     | c |
| 2. Respiratory                                                                                     |      |                |     |     |     |   |
| 2.1 Assesses and manages acute and chronic respiratory failure (type I and type II)                | 97.8 | <i>U/C</i>     | 100 |     |     | c |
| 2.2 Manages chronic obstructive pulmonary disease and status asthmaticus under supervision         | 94.2 | <i>U/C</i>     | 91  | 91  | 100 | b |
| 2.3 Recognizes (diagnosis and grading) and manages acute respiratory distress syndrome             | 96.7 | <i>U/C/E</i>   | 100 |     |     | c |
| 2.4 Manages aspiration                                                                             | 96.1 | <i>U</i>       | 100 |     |     | c |
| 2.5 Recognizes and manages upper airway obstruction                                                | 96.5 | <i>U/C</i>     | 100 |     |     | c |
| 2.6 Recognizes and manages bronchopulmonary infections                                             | 97.4 | <i>U</i>       | 100 |     |     | c |
| 2.7 Recognizes and manages pleural diseases (empyema, effusion, pneumothorax)                      | 92.4 | <i>U/C</i>     | 91  | 100 |     | c |
| 2.8 Recognizes and manages neurogenic breathing patterns (central hyperventilation, Cheyne-Stokes) | 95.9 | <i>U</i>       | 91  | 100 |     | c |

respirations, etc)

|                                                                                                                |      |                |     |   |
|----------------------------------------------------------------------------------------------------------------|------|----------------|-----|---|
| 2.9 Assesses and manages thromboembolic disease (including pulmonary embolism) under supervision               | 95.4 | <i>C</i>       | 100 | b |
| 2.10 Interprets chest radiographs                                                                              | 95.0 | <i>U/C/E</i>   | 100 | c |
| 2.11 Interprets chest CT image                                                                                 | 96.1 | <i>C</i>       | 100 | c |
| 2.12 Performs and interprets end tidal CO <sub>2</sub> monitoring                                              | 92.0 | <i>U</i>       | 100 | c |
| 2.13 Performs and interprets arterial blood gas analysis                                                       | 98.2 | <i>C/E</i>     | 100 | c |
| 2.14 Manages noninvasive and invasive mechanical ventilation: indication, rationale, complication, and weaning | 97.8 | <i>U/A/C/E</i> | 100 | c |
| 3. Renal                                                                                                       |      |                |     |   |
| 3.1 Assesses and manages fluid, electrolytes disorders                                                         | 98.2 | <i>U/C/E</i>   | 100 | c |
| 3.2 Recognizes (diagnosis and grading) and manages acute kidney injury                                         | 95.8 | <i>U/C/E</i>   | 100 | c |
| 3.3 Recognizes and manages derangements secondary to alterations in osmolality and                             | 96.3 | <i>U</i>       | 100 | c |

|                                                                                           |      |                |     |     |   |
|-------------------------------------------------------------------------------------------|------|----------------|-----|-----|---|
| electrolytes                                                                              |      |                |     |     |   |
| 3.4 Manages acid–base disorders                                                           | 97.9 | <i>U/A/C</i>   | 100 |     | c |
| 3.5 Manages oliguria and polyuria                                                         | 97.0 | <i>U</i>       | 100 |     | c |
| 3.6 Manages rhabdomyolysis under supervision                                              | 96.5 | <i>U</i>       | 91  | 100 | b |
| 3.7 Conducts drug dose adjustment in renal failure                                        | 93.9 | <i>U/C</i>     | 91  | 100 | c |
| 3.8 Manages cerebral salt wasting                                                         | 96.3 | <i>U</i>       | 100 |     | c |
| 3.9 Manages syndrome of inappropriate antidiuretic hormone                                | 98.2 | <i>U</i>       | 91  | 100 | c |
| 4. Metabolic and endocrine effects of critical illness                                    |      |                |     |     |   |
| 4.1 Manages diabetes mellitus (ketotic and hyperglycemic hyperosmolar coma, hypoglycemia) | 97.7 | <i>U/C</i>     | 100 |     | c |
| 4.2 Manages systemic inflammatory response syndrome                                       | 93.5 | <i>U</i>       | 100 |     | c |
| 4.3 Performs enteral/parenteral nutritional support                                       | 97.7 | <i>U/A/C/E</i> | 100 |     | c |
| 4.4 Manages pituitary crisis under supervision                                            | -    | <i>O</i>       | 73  | 100 | b |
| 5. Infectious disease                                                                     |      |                |     |     |   |
| 5.1 Complies with infection control measures                                              | 97.0 | <i>U/C/E</i>   | 100 |     | c |

|                                                                                           |      |              |     |     |   |
|-------------------------------------------------------------------------------------------|------|--------------|-----|-----|---|
| 5.2 Performs antimicrobial agent selection and determines dose in critically ill patients | 97.1 | <i>U/C/E</i> | 100 |     | c |
| 5.3 Manages hospital acquired and opportunistic infections in the critically ill patient  | 97.8 | <i>U/A/C</i> | 100 |     | c |
| 5.4 Assesses and manages fever in critically ill patient                                  | 97.2 | <i>U/C</i>   | 91  | 100 | c |
| 5.5 Conducts interpretation of antibiotic concentrations and sensitivities                | 96.9 | <i>U/E</i>   | 100 |     | c |
| 5.6 Recognizes and manages sepsis, severe sepsis, and septic shock                        | 95.2 | <i>C/E</i>   | 100 |     | c |
| 5.7 Recognizes and manages multi-drug resistance bacteria infection                       | -    | <i>O</i>     | 100 |     | c |
| 5.8 Performs antimicrobial agent selection in neurological infections                     | -    | <i>O</i>     | 100 |     | c |
| 6. Acute hematologic disorders                                                            |      |              |     |     |   |
| 6.1 Manages disseminated intravascular coagulation under supervision                      | 97.3 | <i>U/C</i>   | 100 |     | b |
| 6.2 Conducts anticoagulation and fibrinolytic therapy                                     | 96.8 | <i>U/A/C</i> | 100 |     | c |

|                                                                                                                                                      |      |             |     |     |   |
|------------------------------------------------------------------------------------------------------------------------------------------------------|------|-------------|-----|-----|---|
| 6.3 Conducts blood component therapy                                                                                                                 | 96.4 | <i>U/CE</i> | 91  | 100 | c |
| 6.4 Conducts hemostatic therapy                                                                                                                      | 96.8 | <i>U</i>    | 100 |     | c |
| 6.5 Recognizes and manages hypercoagulable states under supervision                                                                                  | 95.8 | <i>U</i>    | 82  | 100 | b |
| 6.6 Recognizes and manages traumatic coagulopathy                                                                                                    | 94.5 | <i>C</i>    | 91  | 100 | c |
| 7. Acute gastrointestinal and genitourinary disorders                                                                                                |      |             |     |     |   |
| 7.1 Assesses and manages gastrointestinal bleeding                                                                                                   | 97.7 | <i>U/C</i>  | 91  | 100 | c |
| 7.2 Prescribes stress ulcer prophylaxis                                                                                                              | 96.4 | <i>C</i>    | 91  | 100 | c |
| 7.3 Assesses and manages abdominal compartment syndrome                                                                                              | 96.4 | <i>U/C</i>  | 82  | 100 | c |
| 8. Immunology and transplantation                                                                                                                    |      |             |     |     |   |
| 8.1 Interprets principles of transplantation (brain death, organ donation, procurement, maintenance of organ donors, implantation) under supervision | 85.5 | <i>U/AE</i> | 73  | 100 | b |
| 9. General trauma and burns                                                                                                                          |      |             |     |     |   |

|                                                                |      |              |     |     |     |   |
|----------------------------------------------------------------|------|--------------|-----|-----|-----|---|
| 9.1 Assesses and provides initial management of trauma patient | 93.8 | <i>U/C/E</i> | 91  | 100 |     | c |
| 9.2 Manages spine and pelvis trauma                            | 91.0 | <i>U</i>     | 82  | 100 |     | c |
| 9.3 Manages chest and abdominal trauma                         | 91.0 | <i>U</i>     | 91  | 100 |     | c |
| 9.4 Manages crush syndrome                                     | -    | <i>O</i>     | 91  | 100 |     | c |
| 9.5 Describes burns and electrical injury                      | 86.4 | <i>U/E</i>   | 64  | 82  | 100 | a |
| 10. Transport                                                  |      |              |     |     |     |   |
| 10.1 Teaches or supervises patient assessment before transport | 97.4 | <i>C/E</i>   | 100 |     |     | d |
| 10.2 Prepares equipment for transport                          | 95.9 | <i>C</i>     | 100 |     |     | c |
| 10.3 Performs intrahospital transport                          | 96.8 | <i>C</i>     | 100 |     |     | c |
| 11.Others                                                      |      |              |     |     |     |   |
| 11.1 Assesses and manages multiorgan dysfunction syndrome      | 93.5 | <i>C</i>     | 100 |     |     | c |
| 11.2 Manages ICU acquired weakness under supervision           | -    | <i>O</i>     | 82  | 100 |     | b |

## C. Critical care monitoring practical procedures



|                                                                                                                                          |      |                |     |     |   |
|------------------------------------------------------------------------------------------------------------------------------------------|------|----------------|-----|-----|---|
| 1. Monitoring                                                                                                                            |      |                |     |     |   |
| 1.1 Performs neuromonitoring                                                                                                             | 96.1 | <i>U</i>       | 100 |     | c |
| 1.2 Interprets principles of ECG monitoring                                                                                              | 98.2 | <i>U</i>       | 100 |     | c |
| 1.3 Performs and interprets invasive hemodynamic monitor                                                                                 | 95.2 | <i>U/C</i>     | 100 |     | c |
| 1.4 Performs and interprets noninvasive hemodynamic monitor                                                                              | 95.4 | <i>U/C</i>     | 100 |     | c |
| 1.5 Performs and interprets respiratory mechanics monitor under supervision                                                              | 95.4 | <i>U/C</i>     | 100 |     | b |
| 1.6 Performs and interprets metabolic monitoring under supervision (oxygen consumption, carbon dioxide production, respiratory quotient) | 94.3 | <i>U</i>       | 100 |     | b |
| 1.7 Conducts multimodality monitoring in NICU                                                                                            | 95.2 | <i>U</i>       | 91  | 100 | c |
| 2. General critical care practical procedures and therapeutic interventions                                                              |      |                |     |     |   |
| 2.1 Performs arterial catheterization                                                                                                    | 96.2 | <i>U/A/C/E</i> | 73  | 100 | c |
| 2.2 Teaches or supervises others central venous catheter insertion                                                                       | 96.4 | <i>U/A/C/E</i> | 100 |     | d |
| 2.3 Conducts vasoactive/inotropic medication therapy                                                                                     | 97.4 | <i>U/C/E</i>   | 100 |     | c |

|                                                                                                                                                                               |      |                |     |     |   |
|-------------------------------------------------------------------------------------------------------------------------------------------------------------------------------|------|----------------|-----|-----|---|
| 2.4 Teaches or supervises others to perform cardiopulmonary resuscitation, postresuscitation brain protection, to provide advanced life support for postresuscitation patient | 98.2 | <i>U/C/E</i>   | 100 |     | d |
| 2.5 Teaches or supervises others to perform cardioversion and defibrillation                                                                                                  | 98.1 | <i>C/E</i>     | 100 |     | d |
| 2.6 Performs airway maintenance and ventilation in nonintubated/unconscious patients                                                                                          | 97.4 | <i>U/A/C/E</i> | 100 |     | c |
| 2.7 Performs tracheal intubation                                                                                                                                              | 96.7 | <i>U/A/C</i>   | 100 |     | c |
| 2.8 Performs difficult and failed airway management                                                                                                                           | 90.7 | <i>E</i>       | 100 |     | c |
| 2.9 Performs and interprets intra-abdominal pressure monitor                                                                                                                  | 88.6 | <i>C</i>       | 73  | 100 | c |
| 2.10 Teaches or supervises others to perform tracheal aspiration                                                                                                              | 94.9 | <i>C/E</i>     | 82  | 100 | d |
| 2.11 Teaches or supervises others to perform oxygen therapy                                                                                                                   | 97.4 | <i>C/E</i>     | 100 |     | d |
| 2.12 Performs fiberoptic bronchoscopy and bronchoalveolar lavage in the intubated patient under supervision                                                                   | 92.0 | <i>U/E</i>     | 91  | 100 | b |
| 2.13 Explains and performs recruitment maneuver: principle and practice under supervision                                                                                     | 93.4 | <i>C</i>       | 100 |     | b |

|                                                                                             |      |                |     |    |     |   |
|---------------------------------------------------------------------------------------------|------|----------------|-----|----|-----|---|
| 2.14 Performs thoracentesis via a chest drain                                               | 91.0 | <i>U/C/E</i>   | 100 |    |     | c |
| 2.15 Performs percutaneous tracheostomy                                                     | 91.2 | <i>U/E</i>     | 100 |    |     | c |
| 2.16 Performs bedside ultrasound to localize pleural effusion and ascites under supervision | 89.9 | <i>C</i>       | 73  | 82 | 100 | b |
| 2.17 Assesses inferior caval vein by ultrasound under supervision                           | -    | <i>O</i>       | 82  | 91 | 100 | b |
| 2.18 Performs ultrasound techniques for vascular localization                               | 89.9 | <i>E</i>       | 73  | 82 | 100 | c |
| 2.19 Performs thyrocricoentesis under supervision                                           | -    | <i>O</i>       | 82  | 91 | 100 | b |
| 3. Neurocritical care practical procedures and therapeutic interventions                    |      |                |     |    |     |   |
| 3.1 Performs lumbar puncture                                                                | 93.8 | <i>U/A/C/E</i> | 100 |    |     | c |
| 3.2 Performs shunt and ventricular drain tap for CSF sampling                               | 94.1 | <i>U</i>       | 100 |    |     | c |
| 3.3 Manages external ventricular drains                                                     | 93.8 | <i>U</i>       | 100 |    |     | c |
| 3.4 Assesses and manages pain of neurocritical care patients                                | 96.2 | <i>U/A/C/E</i> | 100 |    |     | c |
| 3.5 Assesses sedation and describes principle                                               | 97.0 | <i>U/A/C</i>   | 100 |    |     | c |
| 3.6 Interprets and manages of ICP and cerebral perfusion                                    | 94.5 | <i>U/A</i>     | 100 |    |     | c |

## pressure data

|                                                                                                                                                         |      |            |     |     |     |   |
|---------------------------------------------------------------------------------------------------------------------------------------------------------|------|------------|-----|-----|-----|---|
| 3.7 Interprets of saturation of jugular venous oxygenation and brain tissue oxygen data under supervision                                               | 86.9 | <i>U</i>   | 73  | 100 |     | b |
| 3.8 Performs systemic moderate hypothermia under supervision                                                                                            | 95.4 | <i>U</i>   | 100 |     |     | b |
| 3.9 Manages fluid and conducts osmotic dehydration treatment                                                                                            | 96.3 | <i>O</i>   | 100 |     |     | c |
| 3.10 Performs and interprets cerebral multimodality monitoring (pH, partial pressure of carbon dioxide, laser Doppler, microdialysis) under supervision | 89.9 | <i>U/A</i> | 82  | 100 |     | b |
| 3.11 Performs lumbar drain insertion                                                                                                                    | 84.2 | <i>U</i>   | 82  | 100 |     | c |
| 3.12 Manages and inserts ICP monitoring                                                                                                                 | 87.4 | <i>U/A</i> | 82  | 100 |     | c |
| 3.13 Manages cerebral oximetric or perfusion monitoring under supervision                                                                               | 90.1 | <i>U/A</i> | 91  | 100 |     | b |
| 3.14 Performs brain ventricle puncture under supervision                                                                                                | -    | <i>O</i>   | 91  | 100 |     | b |
| 3.15 Interprets CT/MRI of nervous system under supervision                                                                                              | 94.8 | <i>U</i>   | 73  | 82  | 100 | b |
| 3.16 Chooses neuromuscular blockade and describes indication of it under supervision                                                                    | 88.6 | <i>C/E</i> | 82  | 82  | 100 | b |

## D. Professionalism and system management

|                                                                                                                                                                          |      |                |     |     |   |
|--------------------------------------------------------------------------------------------------------------------------------------------------------------------------|------|----------------|-----|-----|---|
| 1. Gather accurate, essential information from all sources, including medical interviews, physical examinations, medical records and Laboratory and radiological results | 96.7 | <i>U/C/E</i>   | 100 |     | c |
| 2. Integrates clinical findings with laboratory investigations to form a differential diagnosis                                                                          | 97.1 | <i>U/C/E</i>   | 100 |     | c |
| 3. Involves patients (or their surrogates if applicable) in decisions about care and treatment (including informed consent and end-of-life care)                         | 96.9 | <i>U/A/C/E</i> | 100 |     | c |
| 4. Promotes collaborative practice principles, including multidisciplinary cooperation and effective team working                                                        | 97.0 | <i>U/E</i>     | 100 |     | c |
| 5. Ensures continuity of care through effective handover of clinical information                                                                                         | 97.7 | <i>C/E</i>     | 100 |     | c |
| 6. Describes implications of chronic and comorbid disease in the acutely ill patient                                                                                     | 93.5 | <i>C/E</i>     | 91  | 100 | c |
| 7. Seeks learning opportunities and integrates new knowledge into clinical practice                                                                                      | 98.2 | <i>U/C/E</i>   | 100 |     | c |
| 8. Applies knowledge to clinical problem solving, clinical decision making, and critical thinking.                                                                       | 98.3 | <i>U/E</i>     | 100 |     | c |
| 9. Develops a clinically applicable knowledge of the basic                                                                                                               | 98.1 | <i>U</i>       | 100 |     | c |

and clinical sciences that underlie the practice of neurointensive care

|                                                                                                                                     |      |              |     |     |   |
|-------------------------------------------------------------------------------------------------------------------------------------|------|--------------|-----|-----|---|
| 10. Provides effective and professional consultation to physicians and health care professionals of other specialty                 | 97.5 | <i>U</i>     | 100 |     | c |
| 11. Maintains accurate medical records and documentation                                                                            | 97.5 | <i>U/C/E</i> | 100 |     | c |
| 12. Communicates the continuing care requirements of patients at ICU discharge to health care professionals, patients and relatives | 96.9 | <i>E</i>     | 100 |     | b |
| 13. Manages the safe and timely discharge of patients from ICU                                                                      | 93.5 | <i>C/E</i>   | 100 |     | c |
| 14. Identifies and minimizes risk of critical incidents and adverse events                                                          | 97.5 | <i>C/E</i>   | 100 |     | c |
| 15. Recognizes and identifies deficiencies in peer performance                                                                      | 96.9 | <i>U</i>     | 91  | 100 | c |
| 16. Identifies environmental hazards and promotes safety for patients and staff                                                     | 97.3 | <i>C/E</i>   | 82  | 100 | c |
| 17. Communicates effectively with patients, relatives and members of the healthcare team                                            | 98.6 | <i>U/C/E</i> | 100 |     | c |
| 18. Respects privacy, dignity, confidentiality, and legal constraints on the use of patient data                                    | 98.3 | <i>U/C/E</i> | 100 |     | c |

|                                                                                                                                                                                                    |      |              |     |   |
|----------------------------------------------------------------------------------------------------------------------------------------------------------------------------------------------------|------|--------------|-----|---|
| 19. Demonstrates sensitivity and responsiveness to gender, age, culture, religion, sexual preference, socioeconomic status, beliefs, behaviors and an awareness of their impact on decision making | 97.5 | <i>U/E</i>   | 100 | c |
| 20. Demonstrates respect, compassion, integrity, and altruism in relationships with patients, families, and colleagues.                                                                            | 97.9 | <i>U</i>     | 100 | c |
| E. Ethical and legal aspects of critical care medicine                                                                                                                                             |      |              |     |   |
| 1. Evaluates death and dying, performs brainstem death testing under supervision                                                                                                                   | 98.0 | <i>U/A/E</i> | 100 | b |
| 2. Manages palliative care of the critically ill patient, forgos life-sustaining treatment and orders not to resuscitate under supervision                                                         | 96.7 | <i>U/E</i>   | 100 | b |
| 3. Applies and describes practice to minimize the physical and psychosocial consequences of critical illness for patients and families under supervision                                           | 96.4 | <i>C/E</i>   | 100 | b |
| 4. Formulates clinical decisions with respect for ethical and legal principles                                                                                                                     | 96.7 | <i>U/C/E</i> | 100 | c |
| 5. Adheres to principles of confidentiality, scientific/academic integrity, and informed consent.                                                                                                  | 96.8 | <i>U</i>     | 100 | c |
| F. Principles of research and certification                                                                                                                                                        |      |              |     |   |

|                                                                              |      |          |     |     |   |
|------------------------------------------------------------------------------|------|----------|-----|-----|---|
| 1. Presentation preparation and skills                                       | 90.7 | <i>U</i> | 73  | 100 | c |
| 2. Certification                                                             |      |          |     |     |   |
| 2.1 Basic life support                                                       | 96.2 | <i>C</i> | 100 |     | d |
| 2.2 Advanced cardiac life support                                            | 97.0 | <i>C</i> | 100 |     | c |
| G. Scoring systems                                                           |      |          |     |     |   |
| 1. General status scoring                                                    |      |          |     |     |   |
| 1.1 Acute physiology and chronic health evaluation II                        | 95.1 | <i>C</i> | 100 |     | c |
| 1.2 Simplified acute physiology score II                                     | 89.2 | <i>C</i> | 73  | 100 | c |
| 2. Organs scoring:                                                           |      |          |     |     |   |
| 2.1 Acute kidney injury scoring (KDIGO)                                      | 90.6 | -        | 73  | 100 | c |
| 2.2 Sequential organ failure assessment                                      | 89.5 | <i>C</i> | 91  | 100 | c |
| 3. Sedation, pain and delirium scoring:                                      |      |          |     |     |   |
| 3.1 Critical care pain observation tool                                      | 91.3 | -        | 100 |     | d |
| 3.2 Richmond agitation-sedation scale                                        | 94.9 | -        | 100 |     | c |
| 3.3 The confusion assessment method for the diagnosis of delirium in the ICU | 92.8 | -        | 100 |     | c |



|                                               |      |          |     |     |   |
|-----------------------------------------------|------|----------|-----|-----|---|
| 3.4 Self-rating anxiety scale                 | 94.6 | <i>O</i> | 100 |     | c |
| 4. Neural system scoring                      |      |          |     |     |   |
| 4.1 Glasgow coma scale                        | 97.0 | -        | 100 |     | d |
| 4.2 National institute of health stroke scale | 89.8 | <i>O</i> | 82  | 100 | c |

\* Source of list: *U*: United Council for Neurologic Subspecialties, *A*: American Academy of Neurology, *C*: Chinese College of Intensive and Critical Care Medicine, *E*: Competency-based Training Programme in ICM for Europe, *O*: Online Delphi, -: during generation and rearrangement of competencies list before the first round of Delphi.

‡ Minimum level of expertise identified during the fifth round nominal group (NG) meeting:

Level a: Has knowledge of (describes) ...

Level b: Performs (manages, conducts, demonstrates, assesses, interprets) ... under supervision

Level c: Performs (manages, conducts, demonstrates, assesses, interprets) ... independently

Level d: Teaches or supervises others to perform (manages) ...

**Table S4. Eliminated items during nominal group meeting**

| Domain                         | Eliminated items                                     | Median (IQR) in the fourth round NG rating |
|--------------------------------|------------------------------------------------------|--------------------------------------------|
| A. Neurological disease states |                                                      |                                            |
|                                | 1. Cerebrovascular diseases                          |                                            |
|                                | 1.1 Infarction and ischemia                          |                                            |
|                                | a. Transient ischemic attacks aggravate              | 4 (4, 5)                                   |
|                                | b. Occlusive vasculopathies (Moya-Moya, sickle cell) | 4 (4, 5)                                   |
|                                | c. Spinal cord infarction                            | 4 (2, 4)                                   |
|                                | 1.2. Vascular malformations                          |                                            |
|                                | a. AV fistulas                                       | 5 (4, 5)                                   |
|                                | b. Cavernous angiomas                                | 4 (4,5)                                    |
|                                | c. Venous angiomas                                   | 4 (4, 5)                                   |
|                                | 1.3 Dural sinus thrombosis                           | 5 (4, 5)                                   |
|                                | 1.4 Cerebral amyloid angiopathy                      | 5 (4, 5)                                   |
|                                | 1.5 Stroke mimics                                    | 3 (2, 4)                                   |
|                                | 1.6 Traumatic aneurysm                               | 5 (4, 5)                                   |

---

|                                                           |          |
|-----------------------------------------------------------|----------|
| 2. Neurotrauma                                            |          |
| 2.1 Traumatic brain injury                                |          |
| a. Skull fracture                                         | 5 (5, 5) |
| b. Fat emboli                                             | 5 (3, 5) |
| 3. Neuromuscular diseases                                 |          |
| 3.1 Amyotrophic lateral sclerosis                         | 4 (3, 4) |
| 3.2 Rhabdomyolysis and toxic myopathies                   | 5 (4, 5) |
| 3.3 Critical illness myopathy and neuropathy              | 5 (4, 5) |
| 3.4 Multiple sclerosis                                    | 4 (2, 4) |
| 3.5 Mitochondrial encephalomyopathy                       | 2 (1, 4) |
| 3.6 Hypokalemic periodic paralysis                        | 4 (2, 4) |
| 4. Infections                                             |          |
| 4.1 Tetanus                                               | 4 (4, 5) |
| 4.2 Botulism                                              | 3 (3, 4) |
| 5. Toxic-metabolic disorders                              |          |
| 5.1 Neuroleptic malignant syndrome/malignant hyperthermia | 5 (4, 5) |

---

|                                                                                                                 |          |
|-----------------------------------------------------------------------------------------------------------------|----------|
| 5.2 Serotonin syndrome                                                                                          | 2 (2, 3) |
| 5.3 Wernicke's encephalopathy                                                                                   | 3 (2, 4) |
| 6. Inflammatory and demyelinating diseases                                                                      |          |
| 6.1 Multiple sclerosis                                                                                          | 4 (3, 4) |
| 6.2 Neurosarcoidosis                                                                                            | 4 (2, 5) |
| 6.3 Acute disseminated encephalomyelitis                                                                        | 4 (3, 5) |
| 6.4 Central nervous system vasculitis                                                                           | 4 (2, 5) |
| 6.5 Chemical or sterile meningitis (i.e., posterior fossa syndrome, nonsteroidal antiinflammatory drug-induced) | 4 (2, 5) |
| 6.6 Autoimmune encephalitis                                                                                     | 4 (4, 5) |
| 7. Encephalopathies                                                                                             |          |
| 7.1 Eclampsia, including hemolysis, elevated liver enzymes, low platelet count syndrome                         | 5 (5, 5) |
| 7.2 Uremic encephalopathy                                                                                       | 5 (4, 5) |
| 7.3 Mitochondrial encephalopathy, lactic acidosis, and stroke like (episodes) and related disorders             | 4 (2, 5) |
| 7.4 Creutzfeldt-jakob encephalopathy                                                                            | 3 (2, 4) |
| 8. Neuroendocrine disorders                                                                                     |          |
| 8.1 Panhypopituitarism                                                                                          | 4 (4, 5) |

---

|                                                          |          |
|----------------------------------------------------------|----------|
| 8.2 Multinle endocrine neoplasia                         | 3 (2, 4) |
| 9. Movement disorders                                    |          |
| 9.1 Hemiballismus                                        | 2 (1, 4) |
| 9.2 Acute dystonic reactions                             | 3 (1, 4) |
| 9.3 Amyotrophic lateral sclerosis                        | 4 (2, 4) |
| 10. Clinical Syndromes                                   |          |
| 10.1 Vegetative state                                    | 5 (5, 5) |
| 10.2 Abulia                                              | 5 (5, 5) |
| 10.3 Dysautonomia (central fever, hyperventilation, etc) | 5 (5, 5) |
| 10.4 Psychiatric emergencies                             | 5 (4, 5) |
| 10.5 Locked-in syndrome                                  | 4 (3, 5) |
| 10.6 Cord compression                                    | 5 (4, 5) |
| 10.7 Brain death                                         | 5 (4, 5) |
| 11. Perioperative neurosurgical care                     |          |
| 11.1 Intracranial pneumatosis                            | 5 (4, 5) |
| 11.2 Postcraniotomy CSF hypovolemia                      | 5 (5, 5) |

---

|                                                                                       |          |
|---------------------------------------------------------------------------------------|----------|
| 11.3 Postcarotid endarterectomy/stenting hyperperfusion syndrome                      | 5 (4, 5) |
| 12. Neuro-Oncology                                                                    |          |
| 12.1 Brain tumors and metastases                                                      | 5 (5, 5) |
| 12.2 Spinal cord tumors and metastases                                                | 4 (4, 5) |
| 12.3 Carcinomatous meningitis                                                         | 3 (2, 4) |
| 12.4 Paraneoplastic syndromes                                                         | 4 (2, 4) |
| 13. Pharmacotherapeutics                                                              | 5 (4, 5) |
| B. General medical disease states                                                     |          |
| 1. Cardiovascular                                                                     |          |
| 1.1 Acute aortic and peripheral vascular disorders (i.e., dissection, pseudoaneurysm) | 5 (4, 5) |
| 1.2 Rupture of aneurysm (bleeding and cardiac tamponade)                              | 5 (4, 5) |
| 1.3 Acute myocarditis                                                                 | 4 (2, 5) |
| 1.4 Cardiac-cerebralsyndrome                                                          | 4 (4, 5) |
| 1.5 Right heart failure                                                               | 5 (4, 5) |
| 2. Respiratory                                                                        |          |
| 2.1 Pulmonary hemorrhage and massive hemoptysis                                       | 5 (5, 5) |

---

|                                                                                     |          |
|-------------------------------------------------------------------------------------|----------|
| 2.2 Sleep apnea                                                                     | 4 (2, 5) |
| 2.3 Obesity-hypoventilation syndrome                                                | 4 (2, 4) |
| 2.4 Smoke inhalation, airway burns                                                  | 4 (2, 5) |
| 3. Renal                                                                            |          |
| 3.1 Critically ill patients with chronic renal failure                              | 4 (4, 5) |
| 3.2 Continuous renal replacement therapy                                            | 5 (3, 5) |
| 4. Metabolic and endocrine effects of critical illness                              |          |
| 4.1 Thyroid storm                                                                   | 5 (4, 5) |
| 4.2 Adrenal crisis                                                                  | 5 (4, 5) |
| 4.3 Pheochromocytoma                                                                | 4 (4, 5) |
| 4.4 Disorders of calcium and magnesium balance                                      | 5 (3, 5) |
| 4.5 Hypothyroidism                                                                  | 4 (4, 5) |
| 4.6 Low serum T3 syndrome                                                           | 3 (2, 5) |
| 5. Infectious disease                                                               |          |
| 5.1 Severe community acquired infection (e.g., severe community-acquired pneumonia) | 4 (4, 5) |
| 5.2 HIV/AIDS                                                                        | 4 (3, 5) |

---

|                                                                                |          |
|--------------------------------------------------------------------------------|----------|
| 5.3 Atypical pathogens and viral infections                                    | 4 (4, 5) |
| 5.4 Fever in critically ill patient                                            | 5 (4, 5) |
| 6. Acute hematologic disorders                                                 |          |
| 6.1 Acute hemolytic disorders including thrombotic microangiopathies           | 5 (4, 5) |
| 7. Acute GI and genitourinary disorders                                        |          |
| 7.1 Acute and fulminant hepatic failure (including drug dosing)                | 5 (4, 5) |
| 7.2 Ileus and toxic megacolon                                                  | 4 (3, 5) |
| 7.3 Acute perforations of the gastrointestinal tract                           | 4 (4, 5) |
| 7.4 Acute vascular disorders of the intestine, including mesenteric infarction | 4 (3, 5) |
| 7.5 Acute intestinal obstruction, volvulus                                     | 4 (3, 5) |
| 7.6 Pancreatitis                                                               | 4 (4, 5) |
| 7.7 Urinary tract bleeding                                                     | 4 (3, 5) |
| 7.8 Obstructive uropathy, acute urinary retention                              | 4 (3, 5) |
| 7.9 Intra-abdominal infection and gastrointestinal leakage                     | 5 (4, 5) |
| 8. Immunology and transplantation                                              |          |
| 8.1 Immunosuppression, especially the neurotoxicity of these agents            | 3 (2, 5) |



---

|                                                                               |          |
|-------------------------------------------------------------------------------|----------|
| 9.Others                                                                      |          |
| 9.1 Acute illness in pregnancy                                                | 5 (4, 5) |
| 9.2 Acute illness in pediatric                                                | 4 (3, 5) |
| 9.3 Initial approach to the manages multisystem trauma                        | 5 (4, 5) |
| 9.4.ICU sleep disorders                                                       | 5 (4, 5) |
| C. Critical care monitoring practical procedures                              |          |
| 1. General critical care practical procedures and therapeutic interventions   |          |
| 1.1 Peripheral venous line placement                                          | 5 (4, 5) |
| 1.2 Nasogastric tube placement                                                | 4 (3, 5) |
| 1.3 Urinary catheterization                                                   | 4 (3, 5) |
| 1.4 Administration of nitric oxide or prostacyclin                            | 3 (2, 4) |
| 1.5 Fiberoptic laryngoscopy                                                   | 4 (4, 5) |
| 1.6 Echocardiography                                                          | 4 (4, 5) |
| 1.7 Pulmonary ultrasonography                                                 | 4 (4, 5) |
| 1.8 Percutaneous gastrostomy                                                  | 2 (1, 4) |
| 1.9 Extracorporeal membrane oxygenation and other circulatory support systems | 3 (2, 5) |

---

|                                                                                                                                                          |          |
|----------------------------------------------------------------------------------------------------------------------------------------------------------|----------|
| 1.10 Enteral nutrition nasogastric tube placement                                                                                                        | 5 (4, 5) |
| 1.11 Pericardiocentesis                                                                                                                                  | 4 (3, 5) |
| 1.12 Sengstaken tube (or equivalent) placement                                                                                                           | 3 (3, 5) |
| 1.13 Indications for gastroscopy                                                                                                                         | 4 (4, 5) |
| 2. Neurocritical care practical procedures and therapeutic interventions                                                                                 |          |
| 2.1 Interpretation of continuous electroencephalogram monitoring                                                                                         | 5 (4, 5) |
| 2.2 Jugular venous bulb catheterization                                                                                                                  | 4 (3, 5) |
| 2.3 Plasmapheresis and intravenous immunoglobulin                                                                                                        | 4 (4, 5) |
| 2.4 Administration of intravenous and intraventricular thrombolysis                                                                                      | 4 (3, 5) |
| 2.5 Intrathecal administration of chemotherapy, and radiographic agents                                                                                  | 5 (4, 5) |
| 2.6 Nervous system ultrasound                                                                                                                            | 4 (3, 5) |
| 2.7 Interpretation of single photon emission-CT and positron emission tomography                                                                         | 3 (2, 3) |
| 2.8 Positron emission tomography                                                                                                                         | 3 (2, 3) |
| 2.9 Endovascular neurosurgical training (e.g., Guglielmi detachable coil placement, arterial stenting, cerebral angioplasty, intraarterial thrombolysis) | 3 (2, 4) |

D. Professionalism and system management

---

|                                                                                                    |          |
|----------------------------------------------------------------------------------------------------|----------|
| 1. Describes and explains the managerial and administrative responsibilities of the ICM specialist | 5 (4, 5) |
| 2. Medical economics: health care reimbursement, budget development                                | 4 (4, 5) |
| F. Principles of research and certification                                                        |          |
| 1. Study design                                                                                    | 4 (4, 5) |
| 2. Biostatistics                                                                                   | 4 (4, 5) |
| 3. Grant funding and protocol writing                                                              | 4 (4, 4) |
| 4. Manuscript preparation                                                                          | 4 (4, 5) |
| 5. Institutional review boards and health insurance portability and accountability act             | 4 (3, 5) |
| G. Scoring systems                                                                                 |          |
| 1.General status scoring:                                                                          |          |
| 1.1 Therapeutic Intervention Scoring System                                                        | 4 (4, 4) |
| 1.2 Multiple organ dysfunction score                                                               | 4 (3, 5) |
| 2. Organs scoring:                                                                                 |          |
| 2.1 Killip class                                                                                   | 4 (4, 5) |
| 2.2 NYHA class                                                                                     | 5 (4, 5) |
| 2.3 Acute lung injury scoring                                                                      | 4 (4, 5) |

|                                                        |          |
|--------------------------------------------------------|----------|
| 2.4 The Child-Pugh score                               | 4 (4, 4) |
| 2.5 Acute kidney injury scoring (AKIN, RIFLE)          | 4 (3, 5) |
| 2.6 Acute pancreatitis scoring                         | 4 (4, 5) |
| 3. Sedation, pain and delirium scoring:                |          |
| 3.1.Ramsay sedation score                              | 4 (2, 5) |
| 3.2 CHADS-2 risk scores in chronic atrial fibrillation | 4 (3, 5) |
| 4. Trauma scoring                                      |          |
| 4.1 Injury severity score                              | 4 (4, 5) |
| 4.2 Abbreviated injury scale                           | 4 (4, 5) |

---
